# Supplementary material for: Brain morphological analysis in mice with hyperactivation of the hedgehog signaling pathway
Source: Frontiers journal article supplement (doi:10.3389/fnins.2024.1449673), 2024-09-03

Supplementary figure 1

WT\_1

n1x\_t2.nii  
n1ANO.nii

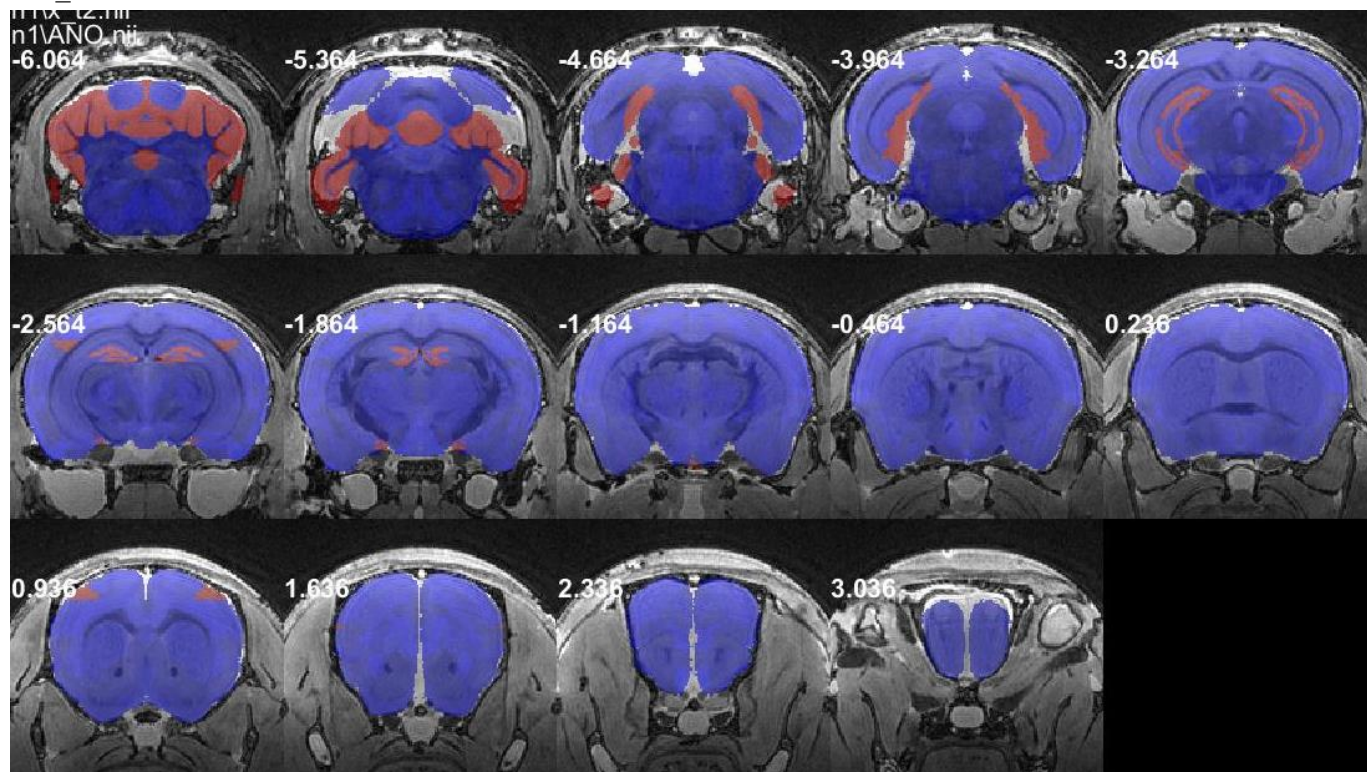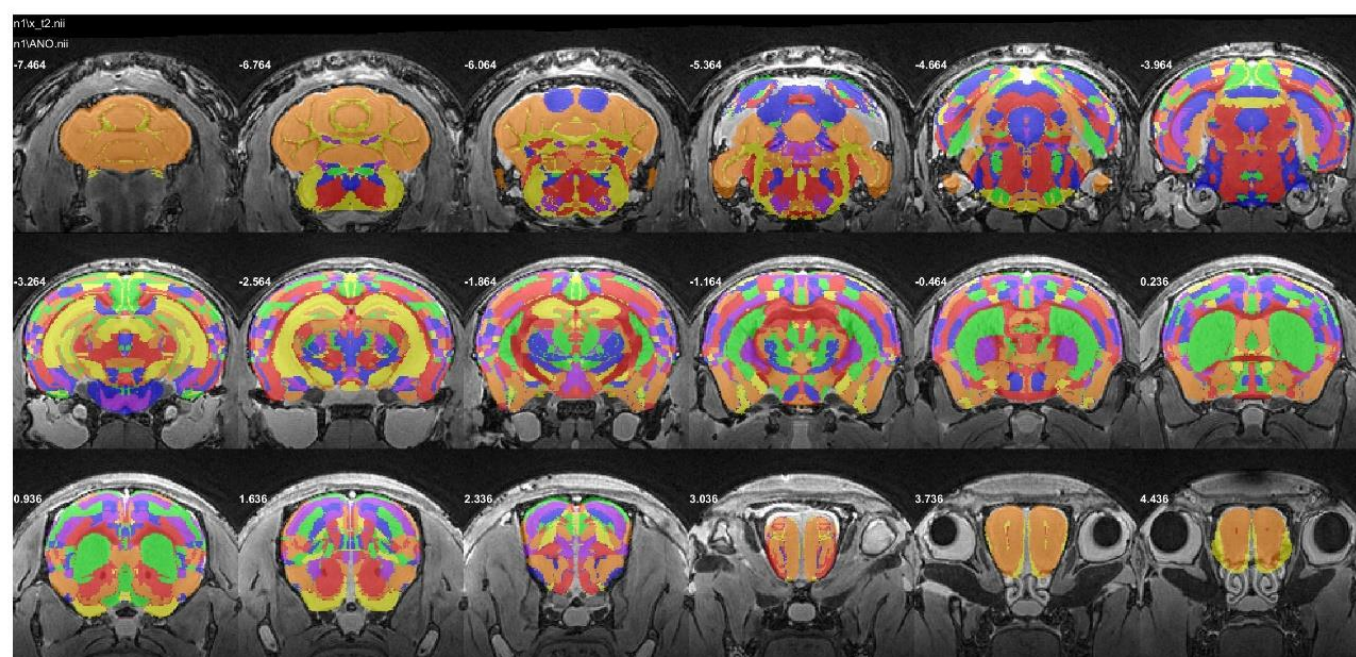



WT\_2

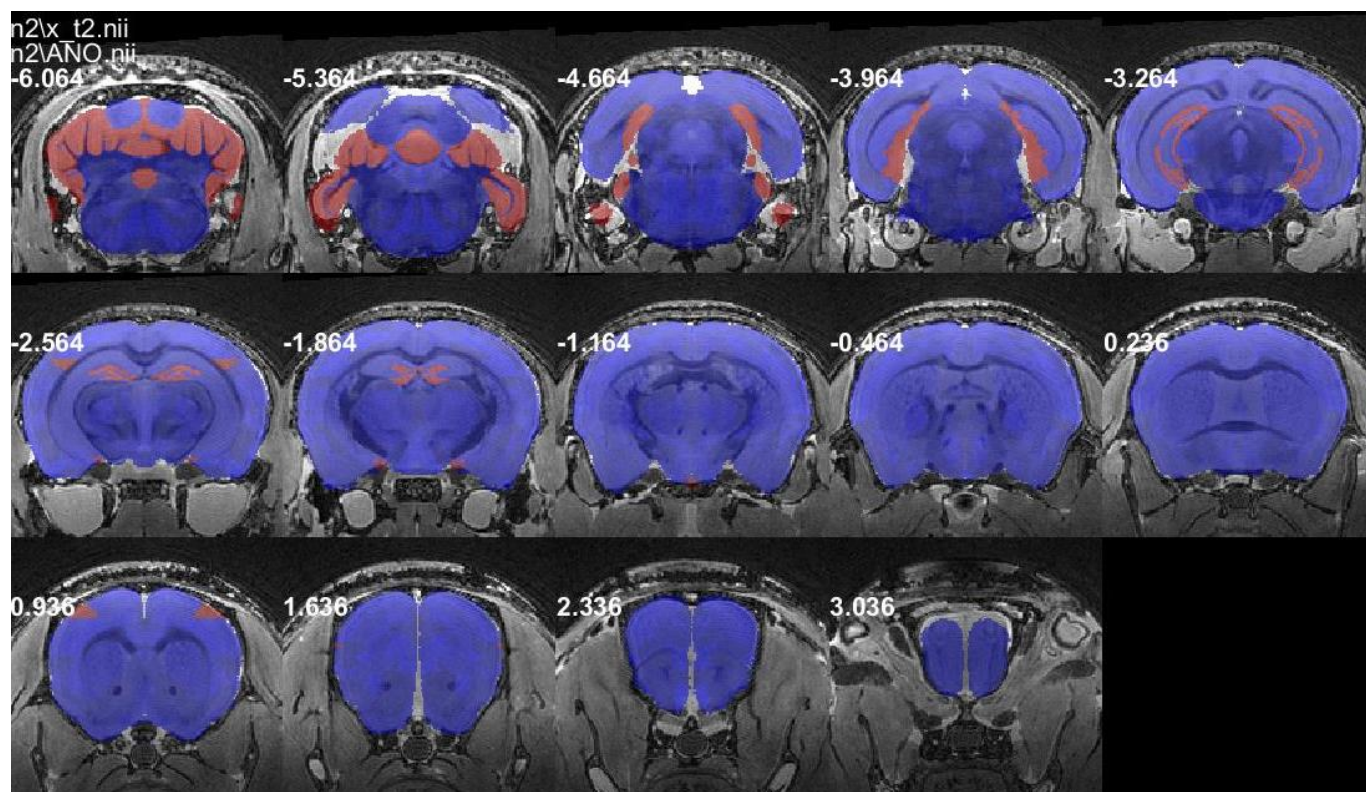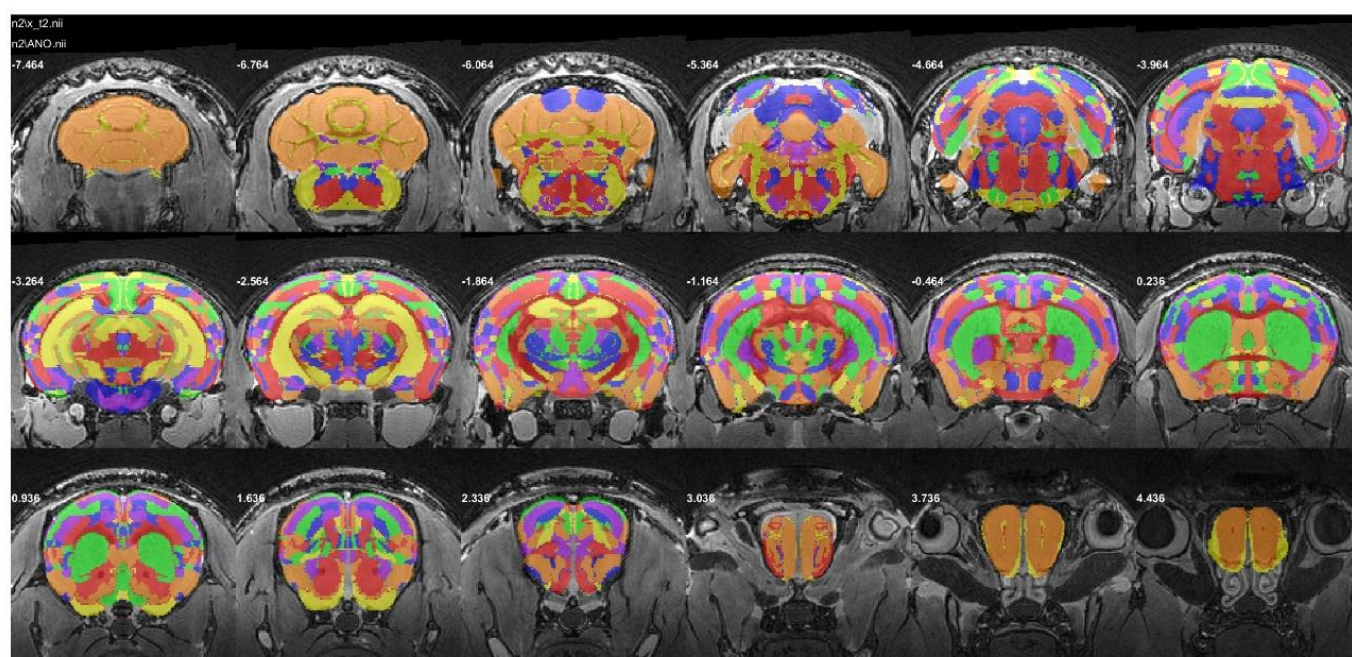



WT\_3

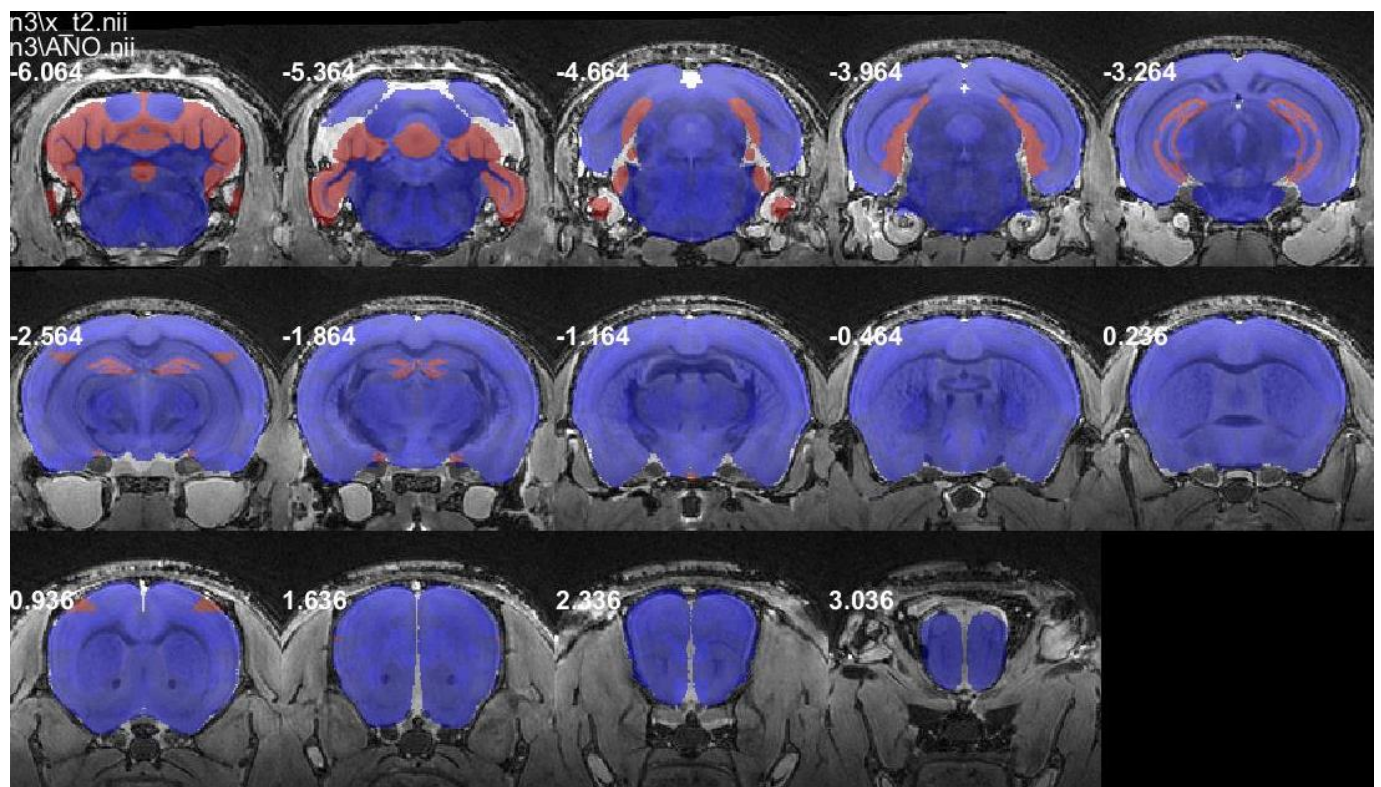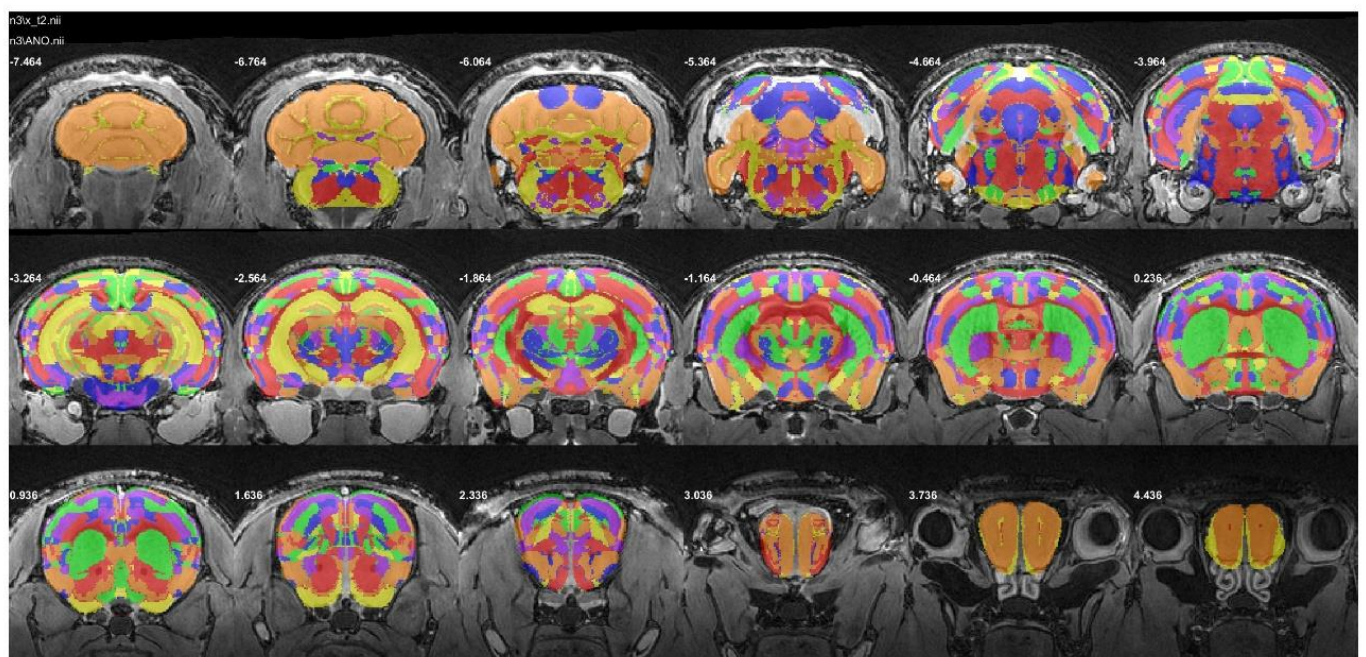



WT\_4

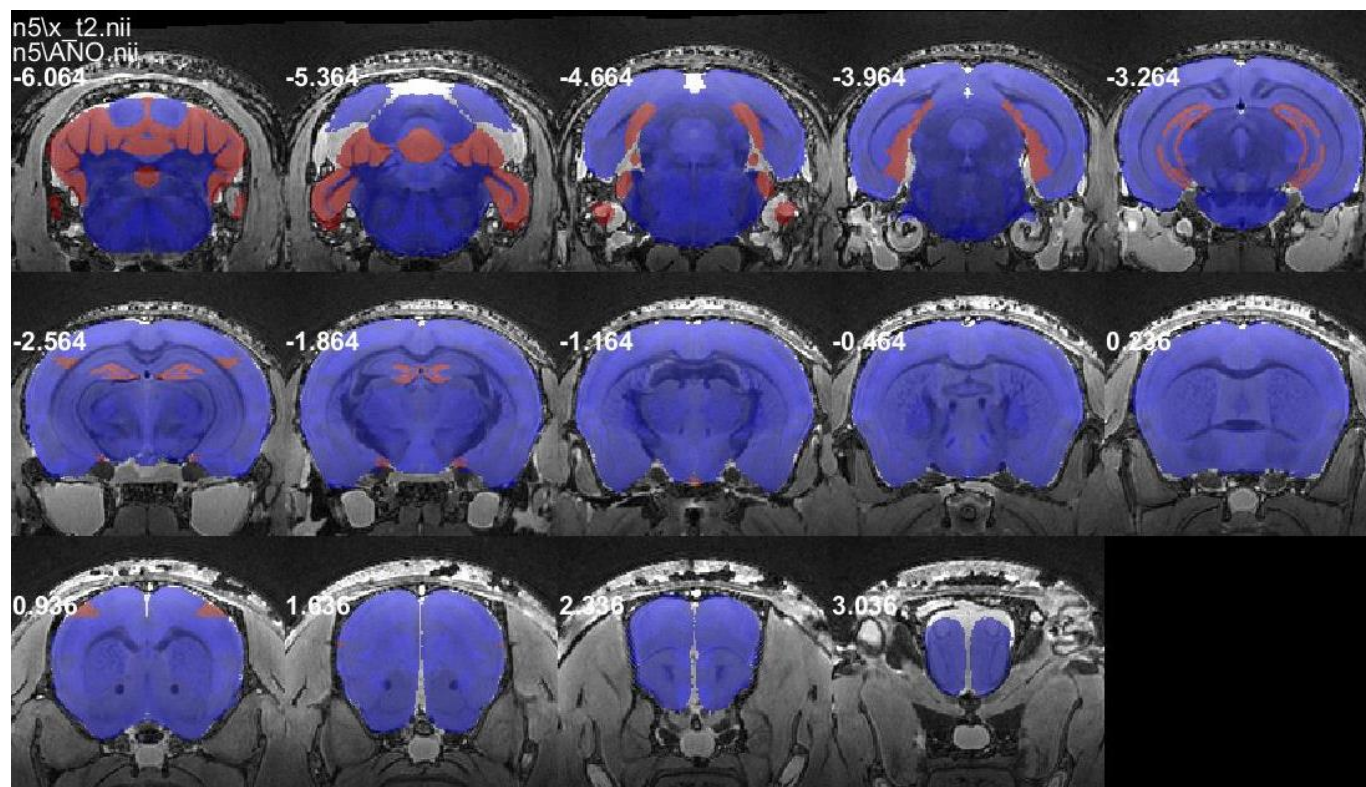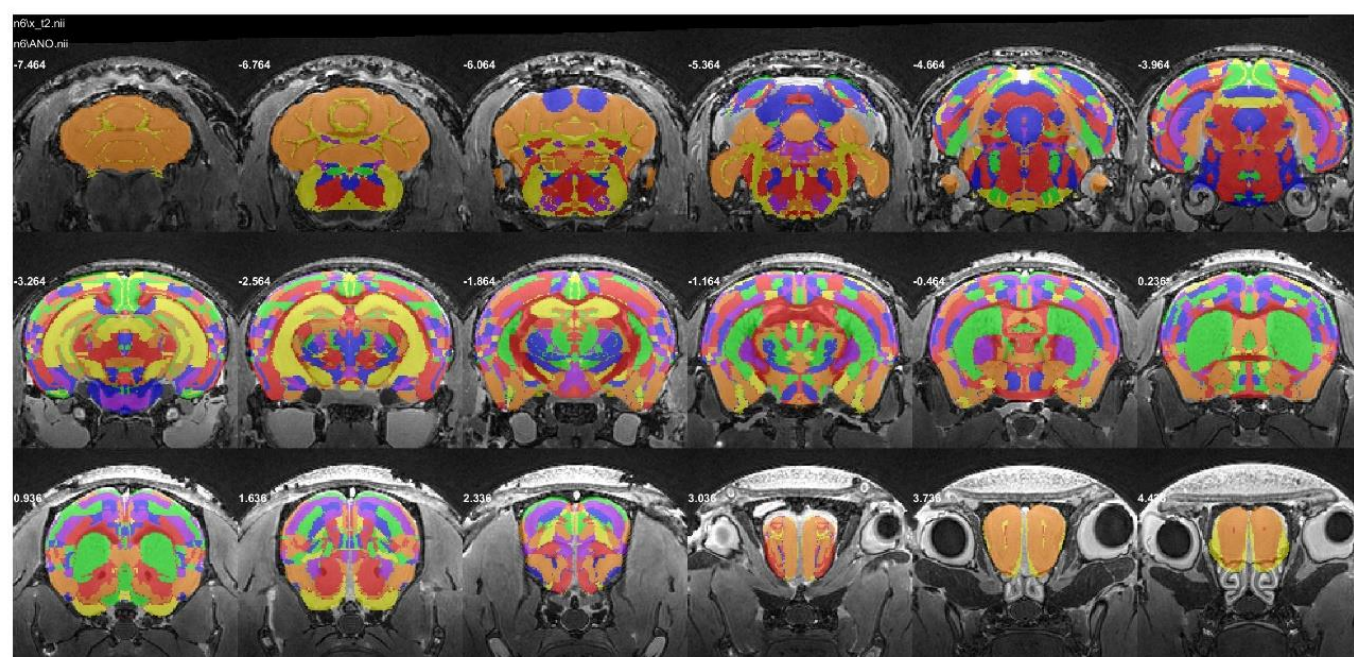



WT\_5

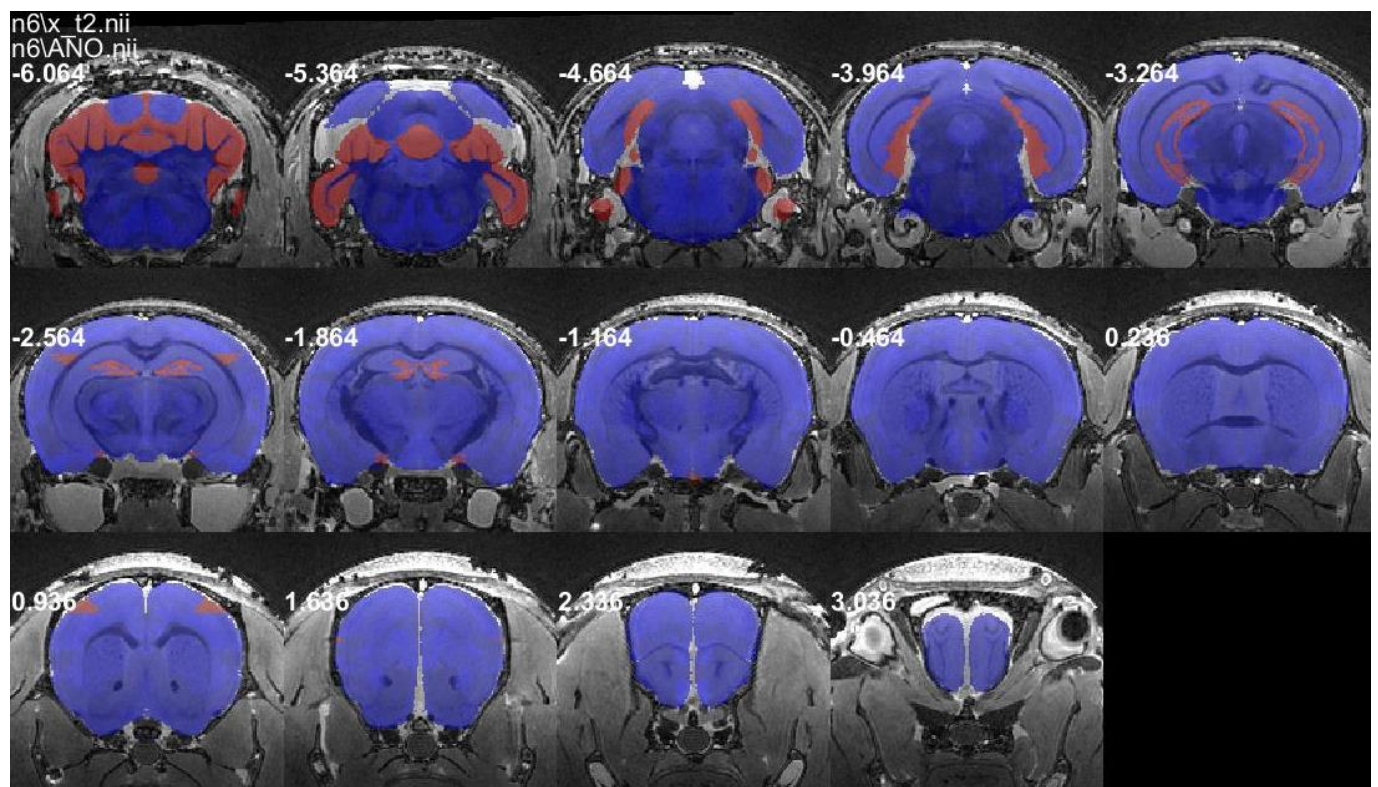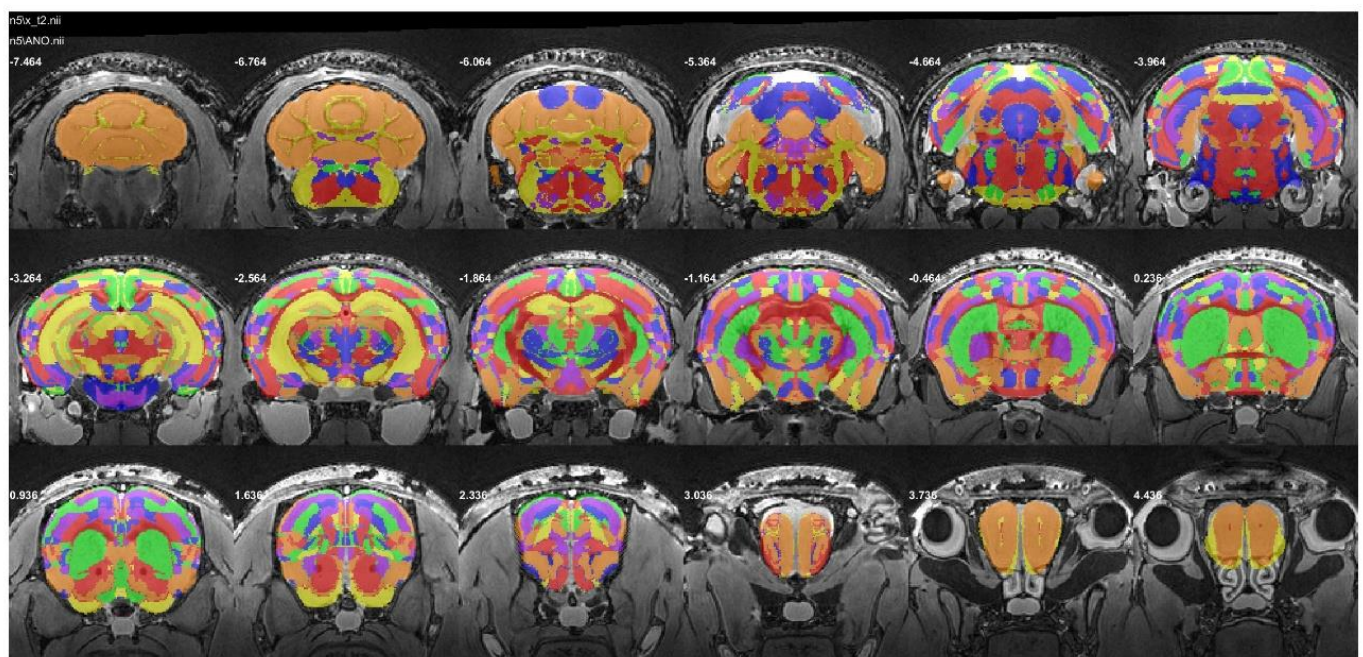



PTCH+/-\_1

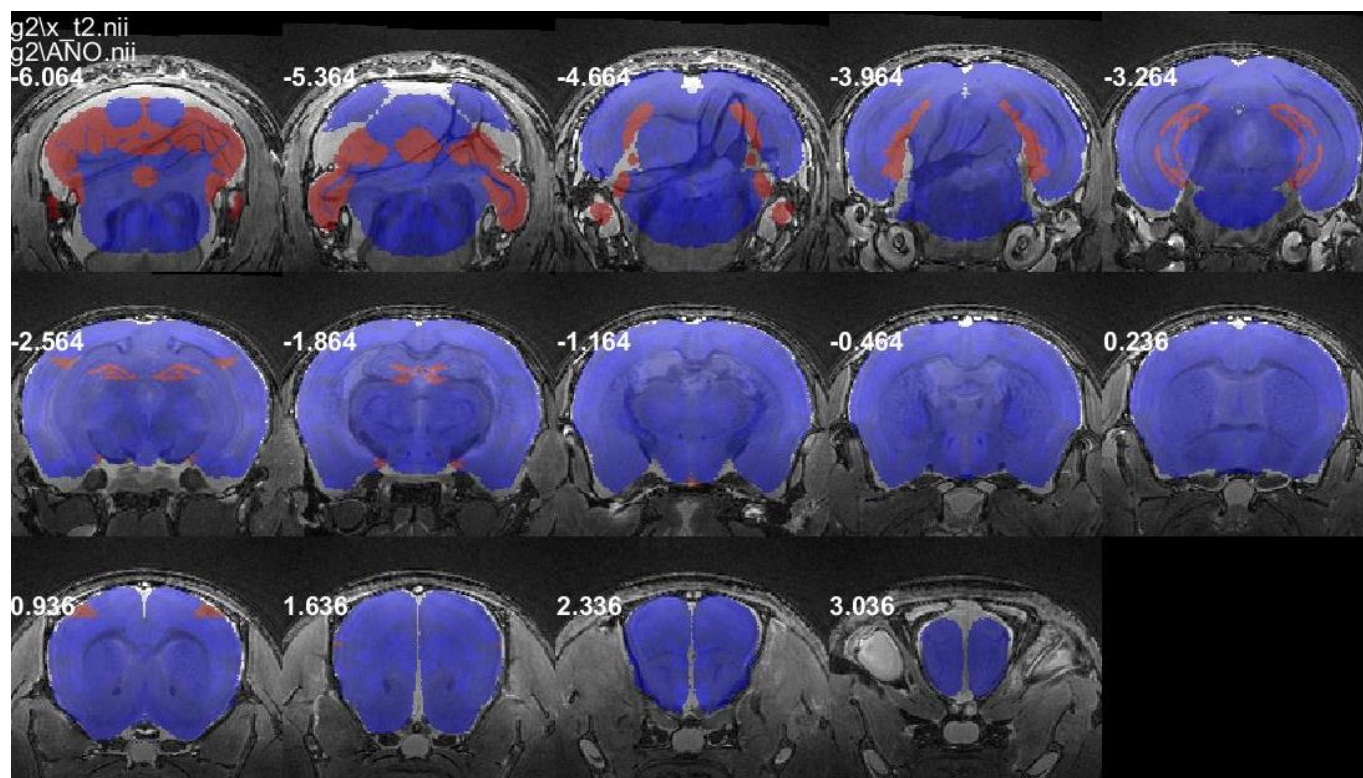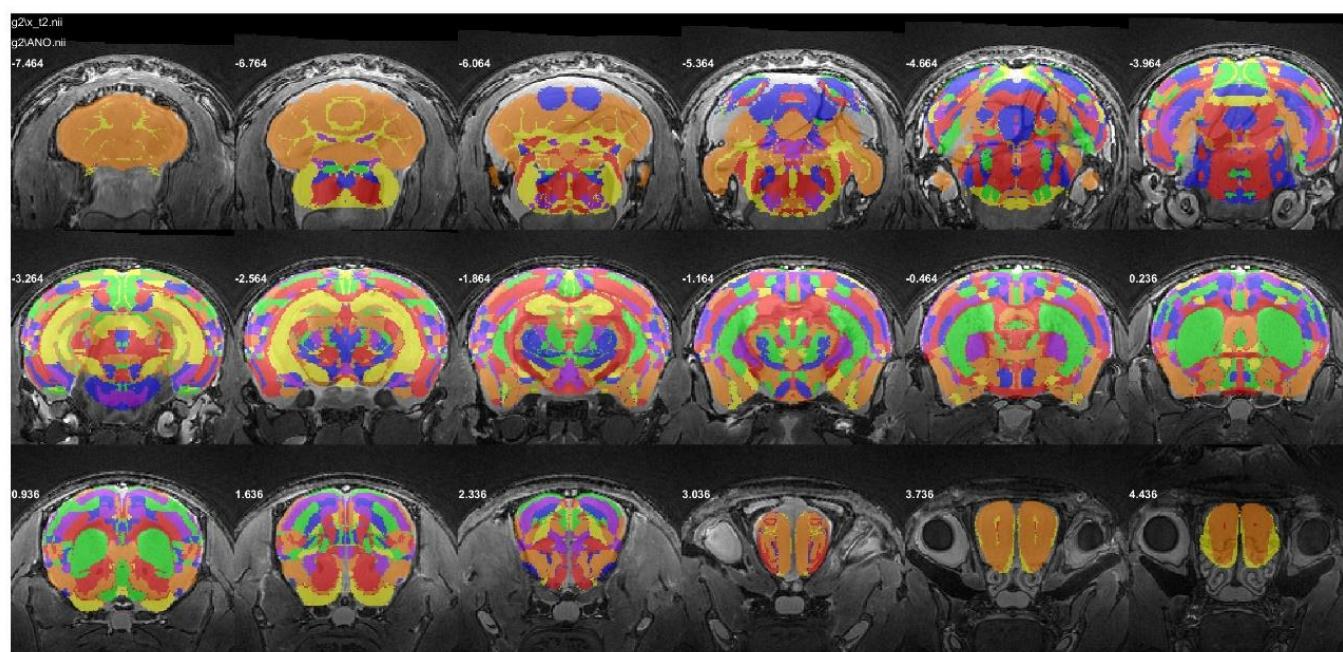



PTCH+/-\_2

g3x\_12.nii  
g3\ANO.nii

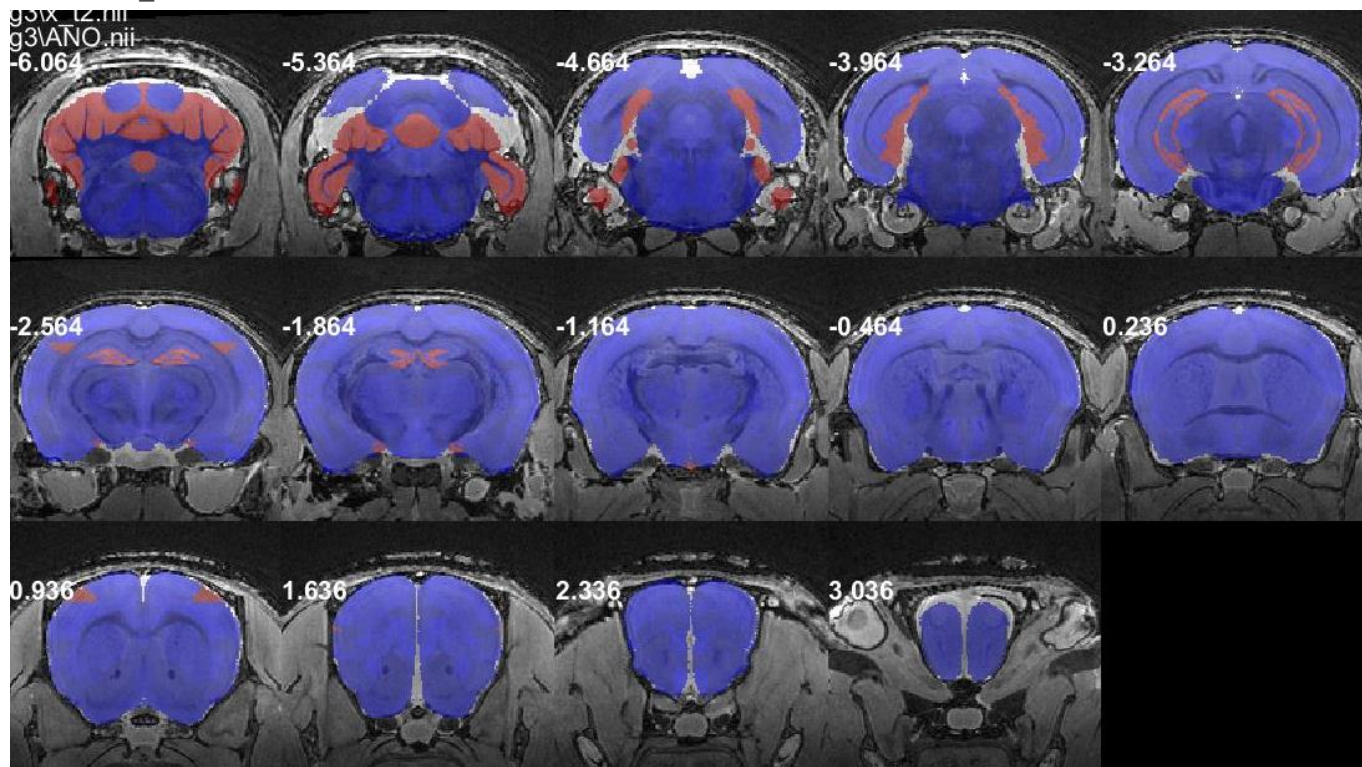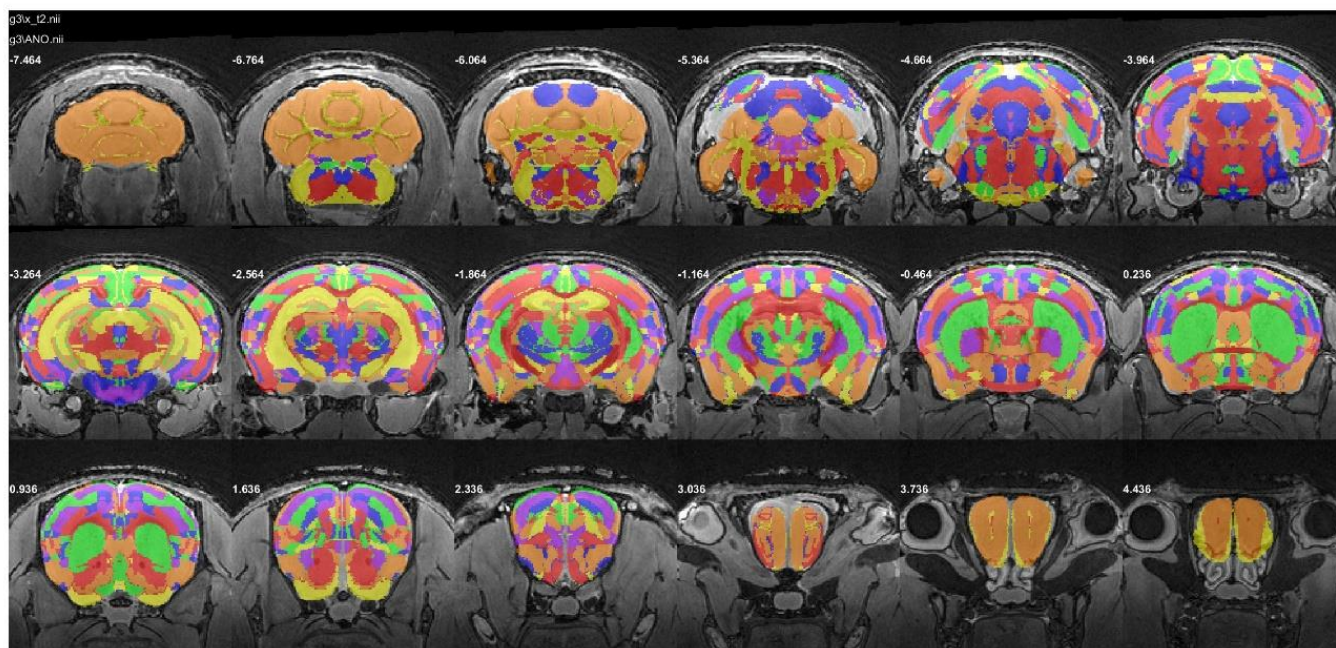



PTCH+/-\_3

g4\\*\_t2.nii  
g4\\*\_ANO.nii

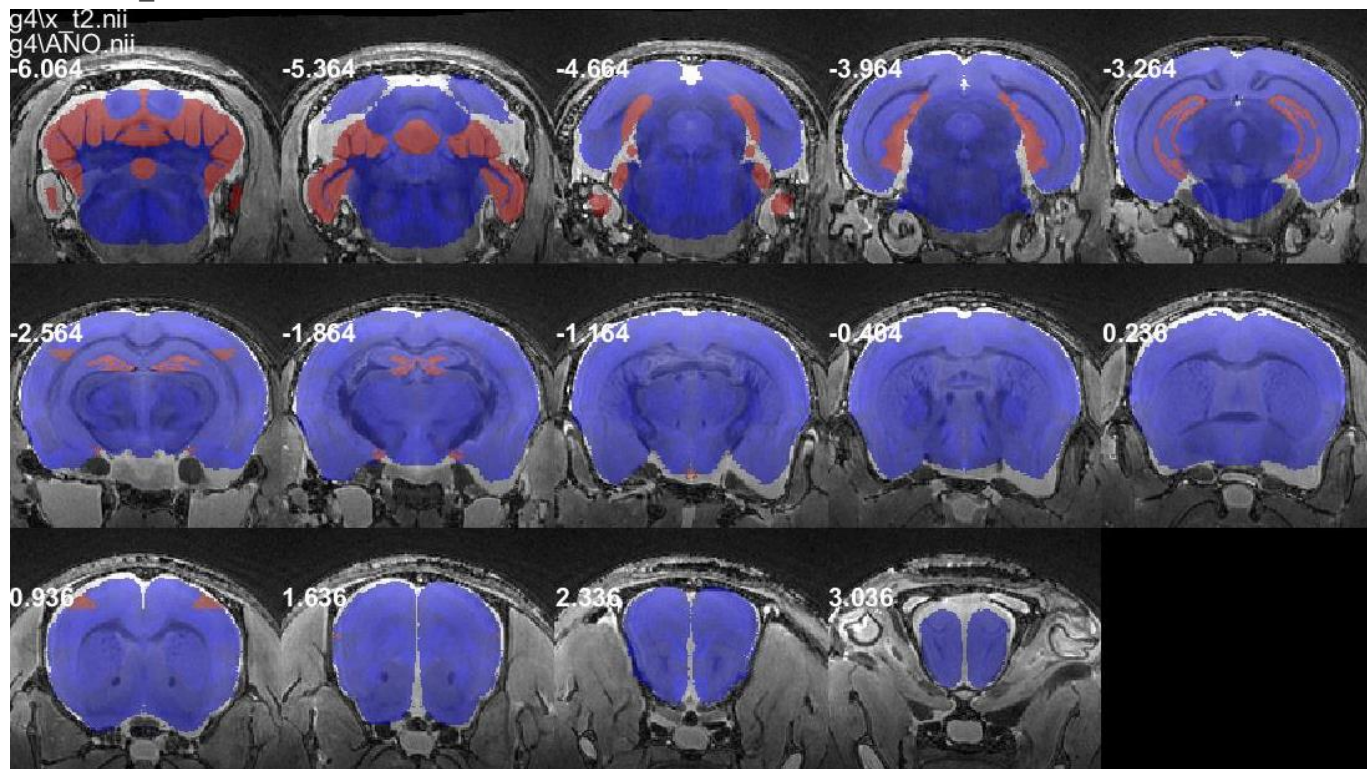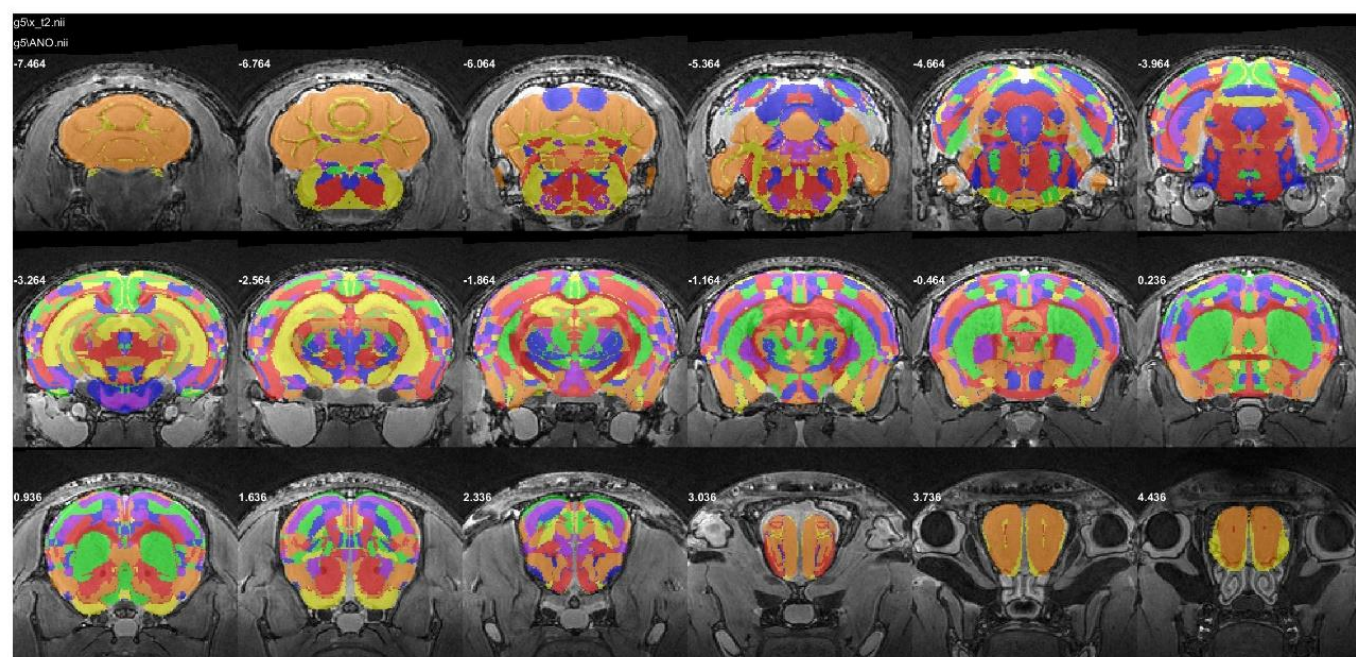



PTCH+/-\_4

g5x\_t2.nii  
g5\ANO.nii  
-6.064

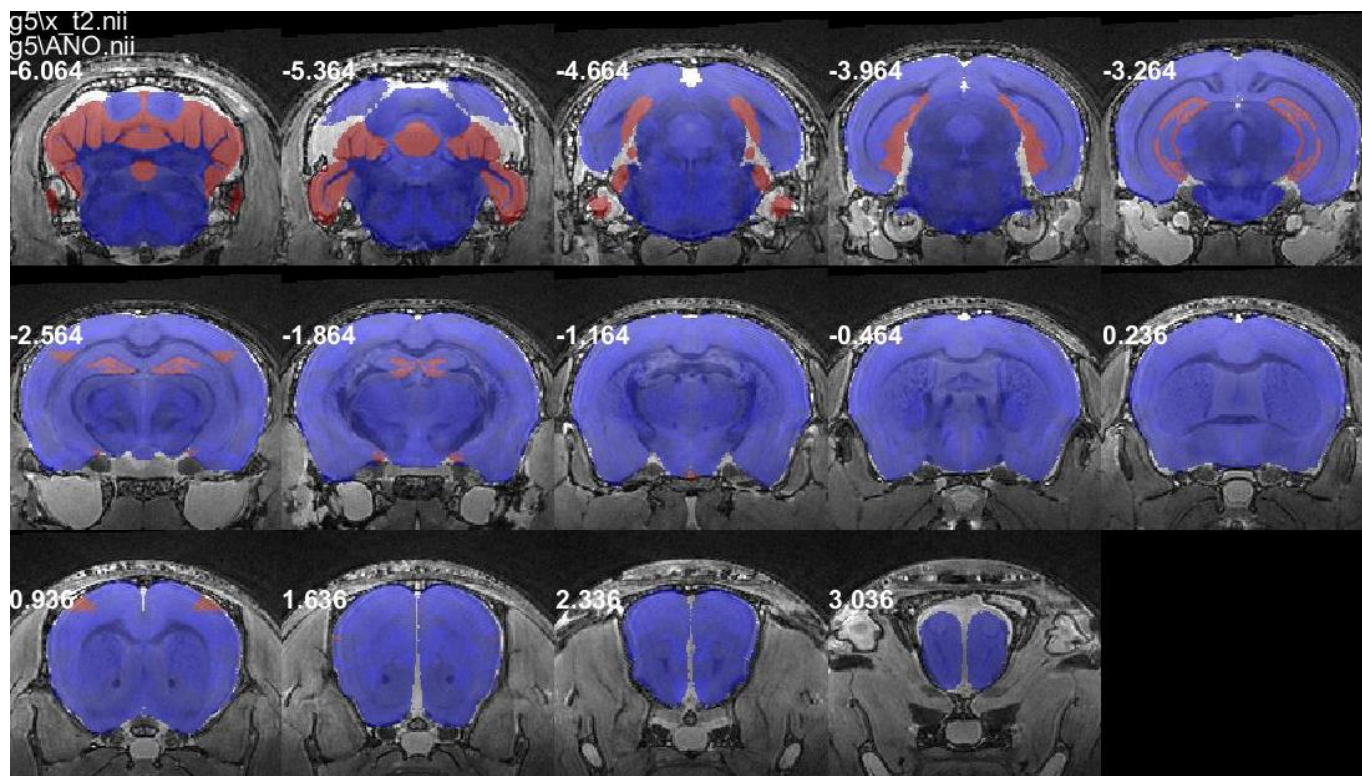

g5x\_t2.nii  
g5\ANO.nii  
-7.464

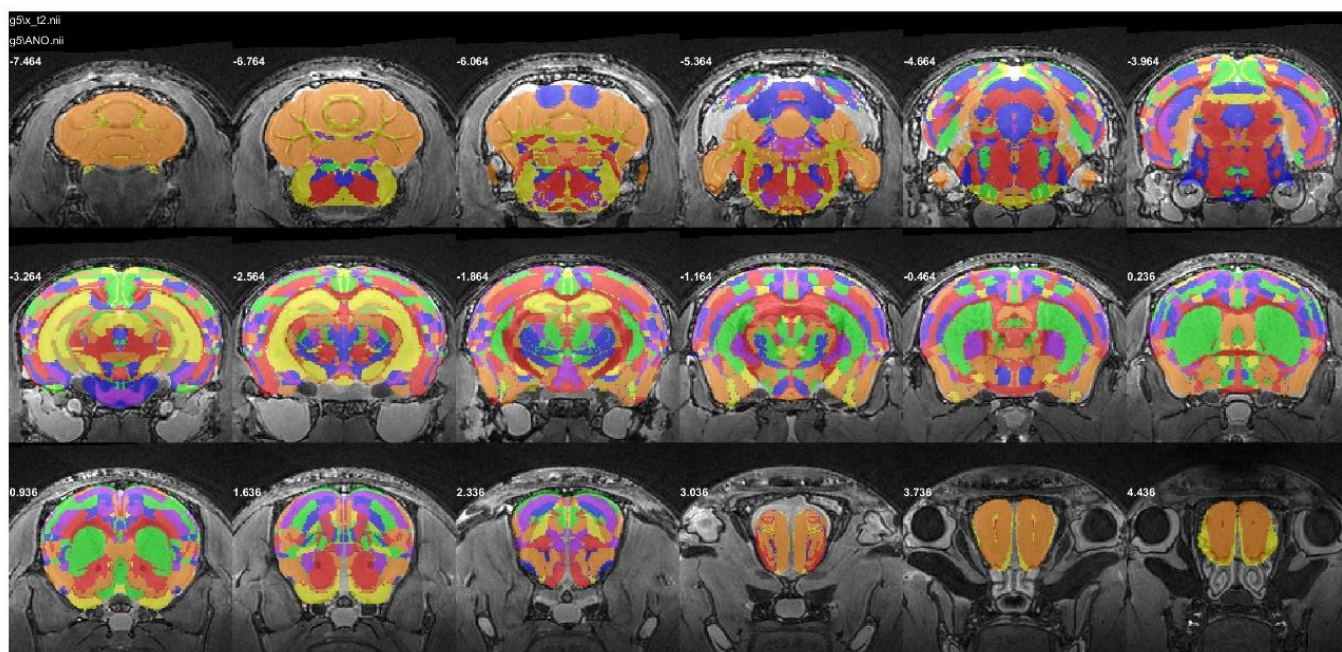



PTCH+/-\_5

g6x\_12.nii  
g6\ANO.nii  
-6.064

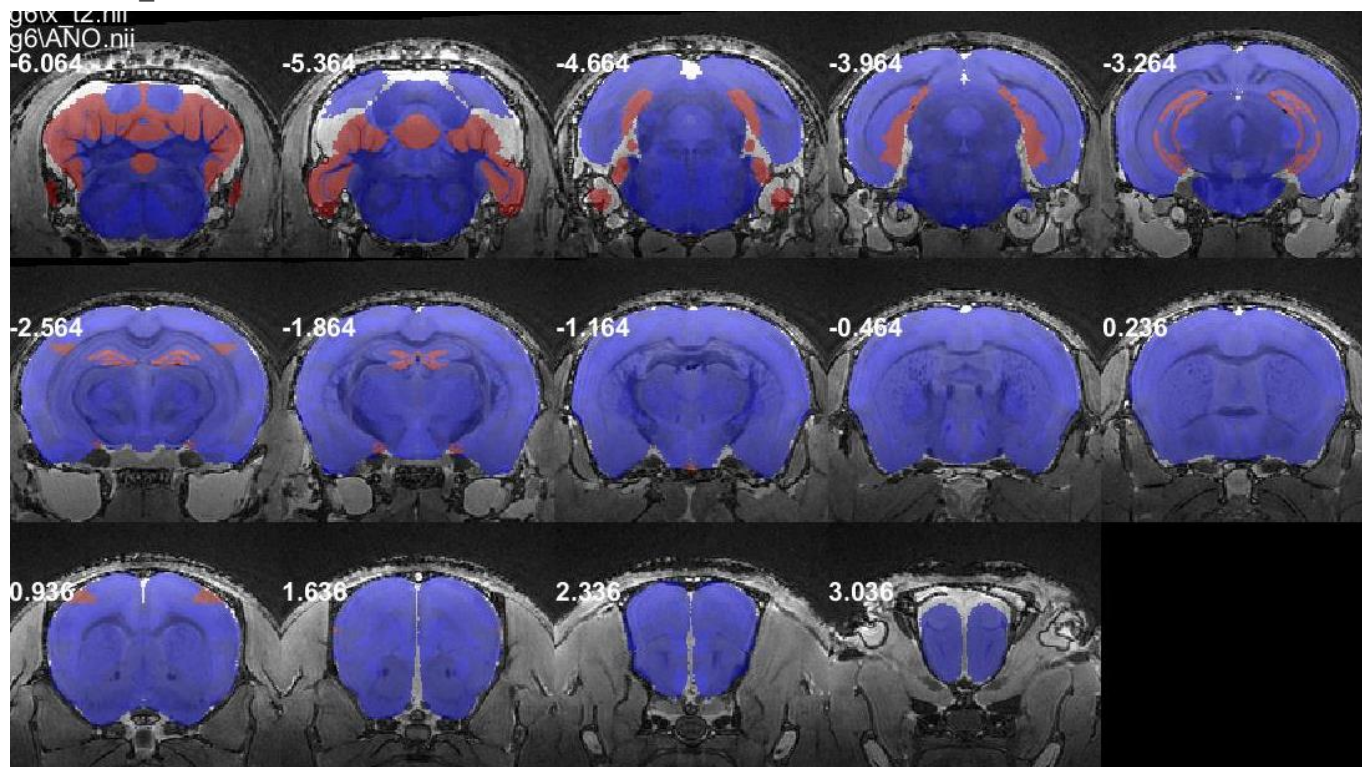

g6x\_12.nii  
g6\ANO.nii  
-7.464

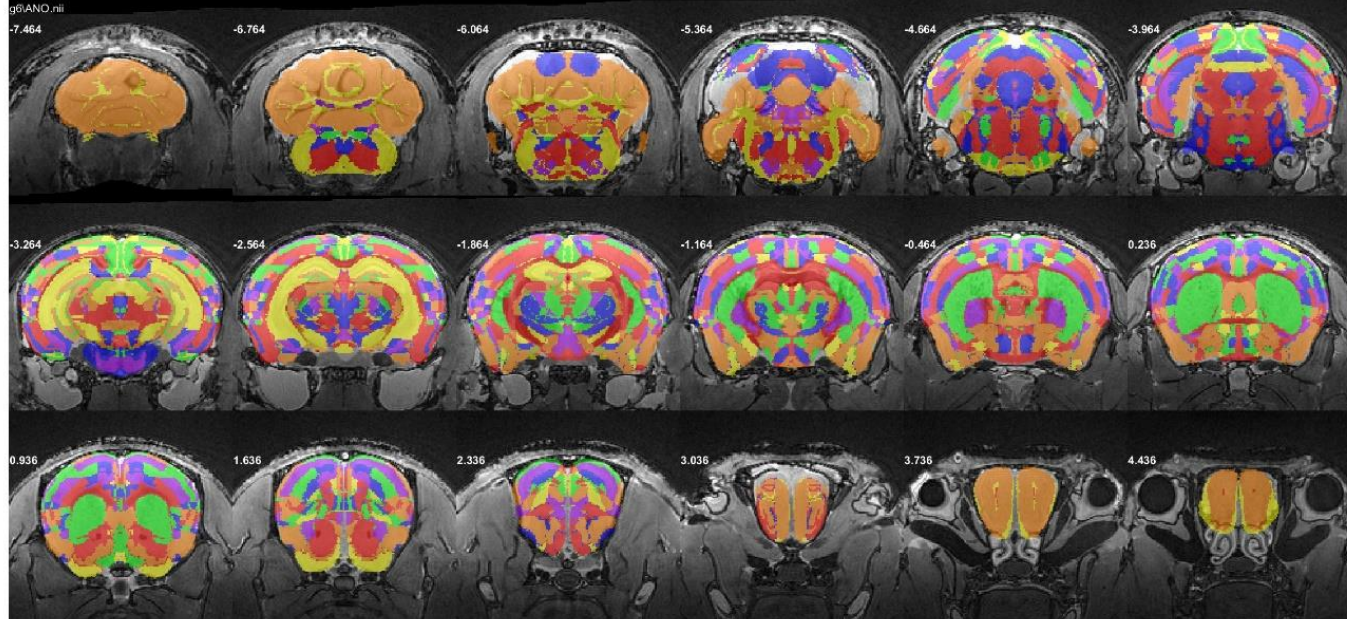

Supplement: Image_1.pdf [file Image_1.pdf]
