# Supplementary material for: Brain morphological analysis in mice with hyperactivation of the hedgehog signaling pathway
Source: Front Neurosci. 2024 Sep 3;18:1449673. doi: 10.3389/fnins.2024.1449673 (PMC11405378; doi:10.3389/fnins.2024.1449673)
Supplement: Supplementary file 1 [file Table_1.xlsx]

## Sheet: Candidate volume
Region name	PTCH+/-_1	PTCH+/-_2	PTCH+/-_3	PTCH+/-_4	PTCH+/-_5	Mean of PTCH+/-	SD of PTCH+/-	WT_1	WT_2	WT_3	WT_4	WT_5	Mean of WT	SD of WT	Fold change of mean	Cohen D	Welch's t-test p-value	FDR (q=0.1)
Infralimbic area layer 2/3	0.473444	0.438634	0.463914	0.466296	0.46356	0.46117	0.0118156	0.419885	0.420878	0.402117	0.422967	0.412362	0.415642	0.00765188	1.10954	4.574	0.000376133	0.000104384
Periventricular hypothalamic nucleus preoptic part	0.13449	0.107866	0.111285	0.117769	0.115378	0.117357	0.00921473	0.0908043	0.0955766	0.0901179	0.0832962	0.0757818	0.0871154	0.00688841	1.34715	3.717	0.000982947	0.000208768
Induseum griseum	0.0508603	0.0426687	0.0508633	0.0460834	0.0450589	0.0471069	0.00326	0.0351611	0.0331105	0.0372078	0.0413067	0.0344773	0.0362527	0.0028521	1.29941	3.544	0.00109344	0.000313152
Ventral part of the lateral geniculate complex	0.64241	0.526361	0.5455	0.593964	0.574501	0.576547	0.0403188	0.459825	0.481296	0.471412	0.42877	0.449912	0.458243	0.0181407	1.25817	3.784	0.00221603	0.000417537
Sublaterodorsal nucleus	0.093187	0.0815825	0.0884133	0.0846569	0.0877283	0.0871136	0.00388796	0.0798805	0.0740719	0.0771464	0.074079	0.0665651	0.0743486	0.00445334	1.17169	3.054	0.0026611	0.000521921
Geniculate group ventral thalamus	0.82776	0.669045	0.703893	0.753378	0.74313	0.739441	0.0533429	0.593642	0.62193	0.600103	0.554397	0.581677	0.59035	0.0222311	1.25255	3.648	0.00294688	0.000626305
Gustatory areas layer 6b	0.0880668	0.0788517	0.0798792	0.0768057	0.0873869	0.0821981	0.00462643	0.0699808	0.0686103	0.0699779	0.0723721	0.0669065	0.0695695	0.00180011	1.18152	3.598	0.00343707	0.000730689
Nucleus sagulum	0.10411	0.0867028	0.0938751	0.0962631	0.0972862	0.0956474	0.00561832	0.0802219	0.0795334	0.0781705	0.0778341	0.0809022	0.0793324	0.00117396	1.20565	4.02	0.00365821	0.000835073
Parastrial nucleus	0.0354998	0.0286734	0.032771	0.0307223	0.0314047	0.0318142	0.00226822	0.0262855	0.0235528	0.0245776	0.027993	0.0273088	0.0259435	0.00165906	1.22629	2.954	0.00374832	0.000939457
Primary somatosensory area upper limb layer 1	0.578578	0.54138	0.53048	0.591574	0.581328	0.564668	0.0241087	0.517516	0.533181	0.479263	0.482367	0.472442	0.496954	0.023924	1.13626	2.819	0.00402059	0.00104384
Nucleus of the lateral lemniscus	1.20153	1.01927	1.11558	1.14628	1.16709	1.12995	0.0620113	0.979731	1.01823	0.968426	0.937082	0.950345	0.970763	0.0278944	1.16398	3.311	0.00414005	0.00114823
Subparafascicular nucleus parvicellular part	0.370358	0.292536	0.322931	0.306199	0.307561	0.319917	0.0269962	0.261831	0.283999	0.240997	0.225309	0.245779	0.251583	0.0199593	1.27162	2.878	0.00425941	0.00125261
Infralimbic area	1.83199	1.61731	1.74983	1.73751	1.74296	1.73592	0.0686199	1.60819	1.52274	1.61325	1.53791	1.5409	1.5646	0.0381928	1.1095	3.085	0.00429971	0.00135699
Nucleus of the lateral lemniscus ventral part	0.833221	0.705228	0.748953	0.785466	0.776583	0.76989	0.0422322	0.680008	0.695661	0.666326	0.63428	0.646876	0.66463	0.0220845	1.15837	3.124	0.00442108	0.00146138
Medial geniculate complex medial part	0.211975	0.170675	0.180582	0.189113	0.183308	0.18713	0.0137801	0.159761	0.1676	0.145759	0.142013	0.149174	0.152862	0.00945059	1.22418	2.9	0.00445195	0.00156576
Dorsal peduncular area layer 5	0.094211	0.0846547	0.0989956	0.0890946	0.0880696	0.0910051	0.00503431	0.0788564	0.0750959	0.076805	0.0730548	0.0856813	0.0778987	0.0043359	1.16825	2.79	0.00445259	0.00167015
Posterior limiting nucleus of the thalamus	0.165893	0.137222	0.153614	0.157025	0.154292	0.153609	0.0092904	0.134158	0.143024	0.119133	0.118458	0.117086	0.126372	0.0103842	1.21553	2.765	0.00459154	0.00177453
Orbital area lateral part layer 5	0.546151	0.480961	0.499074	0.517158	0.527394	0.514148	0.0225266	0.485086	0.445114	0.457417	0.44345	0.463908	0.458995	0.0151111	1.12016	2.875	0.0047794	0.00187891
Pedunculopontine nucleus	0.563559	0.451264	0.489516	0.502138	0.506571	0.50261	0.0361624	0.447877	0.437263	0.388804	0.402143	0.399391	0.415096	0.0231156	1.21083	2.884	0.00499712	0.0019833
Globus pallidus internal segment	0.438969	0.377874	0.35536	0.401096	0.355692	0.385798	0.0314858	0.301771	0.357047	0.303807	0.288464	0.299031	0.310024	0.0240981	1.24441	2.703	0.00574297	0.00208768
Midbrain reticular nucleus	6.57668	5.1339	5.65299	5.63617	5.59959	5.71986	0.469773	4.9444	4.96896	4.51921	4.29931	4.34824	4.61602	0.287674	1.23913	2.834	0.00574644	0.00219207
Infralimbic area layer 1	0.27171	0.251916	0.245782	0.256702	0.268305	0.258883	0.00977996	0.242714	0.226312	0.245776	0.219506	0.219494	0.23076	0.0113291	1.12187	2.657	0.00577635	0.00229645
Orbital area ventrolateral part layer 6a	0.280585	0.244748	0.263192	0.247826	0.251237	0.257518	0.0131205	0.245103	0.212317	0.215054	0.226333	0.225639	0.224889	0.0115418	1.14509	2.641	0.00592009	0.00240084
Dorsal peduncular area	0.321205	0.288782	0.331123	0.309612	0.307561	0.311657	0.0142432	0.267292	0.251571	0.265916	0.237599	0.298348	0.264145	0.0202272	1.17987	2.716	0.00605898	0.00250522
Entorhinal area lateral part layer 2	0.0696342	0.0607602	0.0576905	0.0611032	0.0651988	0.0628774	0.00413709	0.0539364	0.0549565	0.055641	0.0522308	0.0494971	0.0532524	0.00220104	1.18074	2.905	0.00609019	0.0026096
Primary somatosensory area upper limb layer 5	1.77533	1.48419	1.58768	1.68631	1.58867	1.62444	0.0988915	1.38357	1.54868	1.29988	1.33479	1.31867	1.37712	0.0901654	1.17959	2.614	0.00616736	0.00271399
Taenia tecta dorsal part layer 3	0.36319	0.308921	0.355019	0.32907	0.332821	0.337804	0.0193708	0.29904	0.289802	0.280936	0.284368	0.311661	0.293161	0.0110895	1.15228	2.829	0.00630089	0.00281837
Peripeduncular nucleus	0.193542	0.151218	0.168975	0.166924	0.167605	0.169653	0.0135842	0.138937	0.139269	0.141321	0.130406	0.137227	0.137432	0.00374617	1.23445	3.234	0.00731571	0.00292276
Primary somatosensory area barrel field layer 1	0.929822	0.828796	0.851021	0.904259	0.873186	0.877417	0.036181	0.817922	0.834247	0.755761	0.753762	0.791613	0.790661	0.0323212	1.10973	2.529	0.00737645	0.00302714
lateral lemniscus	1.27868	1.11587	1.20399	1.2521	1.31422	1.23297	0.0687139	1.09272	1.09913	1.05035	1.05964	1.06572	1.07351	0.0190526	1.14854	3.163	0.00794965	0.00313152
Superior central nucleus raphe medial part	0.361484	0.313359	0.301083	0.318487	0.353644	0.329611	0.0236438	0.272413	0.278537	0.268647	0.269006	0.275819	0.272884	0.0038416	1.20788	3.349	0.00798171	0.00323591
Superior central nucleus raphe	0.750275	0.616818	0.62299	0.69603	0.70524	0.67827	0.0511071	0.581353	0.594623	0.559141	0.535622	0.550954	0.564338	0.0211539	1.20189	2.913	0.00800768	0.00334029
Pons behavioral state related	4.37057	3.89343	3.67069	4.1953	4.27206	4.08041	0.259597	3.71137	3.63703	3.5501	3.29156	3.37229	3.51247	0.158077	1.16169	2.643	0.00809554	0.00344468
Anterior cingulate area ventral part layer 2/3	1.01652	0.883071	0.849655	0.895042	0.85134	0.899126	0.0612983	0.79266	0.731844	0.820278	0.758541	0.722317	0.765128	0.0368335	1.17513	2.65	0.00810838	0.00354906
Geniculate group dorsal thalamus	2.11497	1.62039	1.80513	1.79964	1.76788	1.8216	0.161364	1.4597	1.61968	1.41253	1.34366	1.51461	1.47004	0.0935575	1.23915	2.666	0.00820631	0.00365344
Dorsal part of the lateral geniculate complex	0.97522	0.744483	0.81074	0.840083	0.789213	0.831948	0.0781273	0.655771	0.73082	0.647552	0.591949	0.686816	0.662581	0.0458365	1.25562	2.644	0.00840668	0.00375783
Primary somatosensory area upper limb	6.55074	5.38376	5.77759	6.10315	5.87984	5.93902	0.38445	5.19838	5.50965	4.93054	4.99333	4.89919	5.10622	0.227031	1.16309	2.638	0.00844162	0.00386221
Nucleus of the lateral lemniscus horizontal part	0.0815813	0.0710007	0.0781724	0.0750989	0.0805598	0.0772826	0.00385335	0.0658843	0.0703171	0.0699779	0.0672514	0.0713442	0.068955	0.0020465	1.12077	2.699	0.00854318	0.0039666
Lingula (I) granular layer	0.0576872	0.0515438	0.0641765	0.059055	0.0672469	0.0599419	0.00543497	0.0494986	0.0508604	0.0419867	0.0505239	0.0481317	0.0482003	0.00324881	1.2436	2.622	0.00856154	0.00407098
Red nucleus	0.426339	0.339984	0.361846	0.363205	0.346475	0.36757	0.0306971	0.321912	0.329398	0.296638	0.281295	0.266943	0.299237	0.0236447	1.22836	2.494	0.00859509	0.00417537
Pallidum dorsal region	2.80039	2.39354	2.253	2.63768	2.32121	2.48117	0.205776	2.09772	2.26175	1.97781	1.88236	1.97203	2.03833	0.131018	1.21725	2.567	0.00885425	0.00427975
Agranular insular area ventral part layer 5	0.475151	0.400403	0.416806	0.413044	0.452637	0.431608	0.0278414	0.383699	0.358412	0.368323	0.366981	0.369351	0.369353	0.0081512	1.16855	3.035	0.00901146	0.00438413
Medial geniculate complex	1.13975	0.875903	0.994394	0.959559	0.978665	0.989654	0.0854595	0.803926	0.888862	0.764978	0.751714	0.827797	0.807455	0.0489178	1.22565	2.617	0.00906177	0.00448852
Primary somatosensory area upper limb layer 2/3	1.6917	1.48521	1.51634	1.68529	1.56887	1.58948	0.0851758	1.39176	1.54424	1.28725	1.35015	1.30502	1.37569	0.091801	1.15541	2.414	0.0092393	0.0045929
Primary somatosensory area mouth	3.46191	2.96701	3.12041	3.20467	3.23912	3.19862	0.161716	2.88355	3.05401	2.77761	2.79281	2.75102	2.8518	0.110489	1.12162	2.504	0.00930433	0.00469729
Anteroventral periventricular nucleus	0.0901149	0.0754382	0.0737347	0.0884118	0.0826079	0.0820615	0.00661342	0.062812	0.077144	0.0699779	0.0576928	0.0590552	0.0653364	0.00728302	1.25598	2.404	0.00948642	0.00480167
Parabigeminal nucleus	0.115033	0.0877268	0.106847	0.0945563	0.105137	0.10186	0.00961489	0.0819287	0.0931872	0.075781	0.0785169	0.0788541	0.0816536	0.00608709	1.24747	2.511	0.00987517	0.00490605
Globus pallidus external segment	2.36142	2.01567	1.89764	2.23658	1.96552	2.09537	0.174946	1.79595	1.9047	1.67401	1.59389	1.673	1.72831	0.10933	1.21238	2.516	0.00990878	0.00501044
Medial amygdalar nucleus posterodorsal part sublayer c	0.176134	0.144049	0.141325	0.156001	0.13347	0.150196	0.0148506	0.120845	0.136197	0.10821	0.114703	0.11538	0.119067	0.00945629	1.26144	2.5	0.010016	0.00511482
Midbrain reticular nucleus retrorubral area	0.569362	0.435221	0.481323	0.46493	0.485066	0.48718	0.0446934	0.433198	0.403128	0.379929	0.385074	0.370034	0.394273	0.0222328	1.23564	2.632	0.0102373	0.00521921
Medial geniculate complex ventral part	0.627732	0.491885	0.56291	0.515793	0.550264	0.549717	0.0463813	0.444805	0.495974	0.437618	0.414091	0.473807	0.453259	0.0286253	1.21281	2.503	0.0102824	0.00532359
Orbital area	4.56002	4.11667	4.22472	4.34037	4.36354	4.32107	0.148548	4.14354	3.96984	3.95017	3.94291	4.0632	4.01393	0.0778212	1.07652	2.59	0.0104144	0.00542797
Nucleus of the lateral lemniscus dorsal part	0.286729	0.243041	0.288453	0.285717	0.30995	0.282778	0.0217892	0.233838	0.252254	0.232122	0.235551	0.232125	0.237178	0.00764444	1.19226	2.793	0.010986	0.00553236
Parasubiculum layer 1	0.328032	0.243382	0.29767	0.262846	0.299027	0.286191	0.0297481	0.211649	0.219485	0.245093	0.222578	0.222566	0.224274	0.0111495	1.27608	2.756	0.0109916	0.00563674
Gracile nucleus	0.0754371	0.0747555	0.066566	0.0764643	0.0761222	0.073869	0.0036984	0.0679326	0.0689517	0.0675884	0.0621307	0.0593966	0.0652	0.00375091	1.13296	2.327	0.0110011	0.00574113
Dorsal peduncular area layer 2/3	0.0969418	0.0914817	0.103775	0.0945563	0.0983103	0.0970129	0.00409975	0.0860252	0.0819228	0.0737328	0.0713479	0.0925085	0.0811074	0.00780339	1.1961	2.552	0.0110816	0.00584551
Intergeniculate leaflet of the lateral geniculate complex	0.159749	0.121179	0.13518	0.131764	0.144052	0.138385	0.0129513	0.112993	0.117081	0.106844	0.106851	0.111283	0.111011	0.00388632	1.24659	2.863	0.0111001	0.0059499
external medullary lamina of the thalamus	0.334517	0.270349	0.271726	0.300737	0.275815	0.290629	0.0245619	0.252955	0.257374	0.236559	0.217799	0.238952	0.240728	0.0139489	1.20729	2.498	0.0112539	0.00605428
Primary somatosensory area barrel field layer 2/3	3.10862	2.72568	2.8067	3.02068	2.90015	2.91237	0.138865	2.70092	2.8062	2.48029	2.52005	2.55678	2.61285	0.122038	1.11463	2.291	0.0121369	0.00615866
External cuneate nucleus	0.462863	0.370023	0.469034	0.408265	0.456733	0.433384	0.0382903	0.359804	0.377869	0.355351	0.329771	0.358428	0.356244	0.0154058	1.21653	2.643	0.0122619	0.00626305
Medial amygdalar nucleus posterodorsal part	0.49256	0.409278	0.400079	0.433867	0.374125	0.421982	0.0401345	0.337615	0.373431	0.328384	0.329088	0.337946	0.341293	0.0165723	1.23642	2.628	0.0122776	0.00636743
Pontine reticular nucleus	3.01748	2.77244	2.49367	2.93432	2.96126	2.83583	0.189486	2.59339	2.55804	2.49019	2.27323	2.3663	2.45623	0.11992	1.15455	2.394	0.0122974	0.00647182
Taenia tecta dorsal part	1.37084	1.15888	1.3361	1.25279	1.26848	1.27742	0.0733601	1.15758	1.14316	1.06878	1.12313	1.16813	1.13216	0.0350983	1.1283	2.526	0.012666	0.0065762
Medial amygdalar nucleus posterodorsal part sublayer b	0.127663	0.107184	0.106164	0.109917	0.0955794	0.109302	0.0103936	0.0870493	0.0986487	0.0836321	0.0863686	0.0887535	0.0888904	0.00515057	1.22962	2.488	0.0130537	0.00668058
Orbital area ventrolateral part	1.60466	1.43845	1.50781	1.50573	1.49889	1.51111	0.0533303	1.46277	1.37937	1.37157	1.41228	1.40572	1.40634	0.0321128	1.07449	2.38	0.0132016	0.00678497
Primary somatosensory area unassigned layer 1	0.415757	0.362513	0.351946	0.386076	0.389486	0.381156	0.0223231	0.34137	0.356364	0.333163	0.322943	0.333508	0.33747	0.0111127	1.12945	2.478	0.0132399	0.00688935
Striatum dorsal region	30.4049	24.54	25.5825	25.8477	27.4385	26.7627	2.04416	23.3599	23.0435	22.5131	22.0656	22.0351	22.6035	0.526563	1.18401	2.787	0.0133126	0.00699374
Caudoputamen	30.4049	24.54	25.5825	25.8477	27.4385	26.7627	2.04416	23.3599	23.0435	22.5131	22.0656	22.0351	22.6035	0.526563	1.18401	2.787	0.0133126	0.00709812
Ventral posterolateral nucleus of the thalamus	1.13975	0.867369	0.892667	0.983454	0.889571	0.954562	0.100783	0.758523	0.86292	0.744838	0.694704	0.731192	0.758435	0.0564019	1.25859	2.402	0.0135672	0.00720251
Barrington's nucleus	0.0471055	0.0365244	0.0443773	0.0419871	0.0450589	0.0430106	0.00363181	0.0392575	0.0341345	0.0375491	0.036186	0.0307224	0.0355699	0.00294803	1.20919	2.25	0.0136894	0.00730689
thalamus related	0.36319	0.284344	0.288794	0.316439	0.295955	0.309745	0.0288982	0.268658	0.270004	0.24919	0.231113	0.249534	0.2537	0.0144044	1.22091	2.455	0.0137485	0.00741127
Anterior olfactory nucleus posteroventral part	0.734914	0.647199	0.651323	0.703881	0.663936	0.68025	0.0338879	0.657819	0.599743	0.620585	0.581366	0.603524	0.612607	0.0258138	1.11042	2.246	0.0142944	0.00751566
Dorsal peduncular area layer 6a	0.0375479	0.0324282	0.0355019	0.0334531	0.0324287	0.034272	0.00198553	0.0290164	0.0252595	0.0283325	0.0269688	0.0337946	0.0286744	0.00286428	1.19521	2.271	0.014466	0.00762004
Striatum	51.2535	41.2354	43.1966	43.8895	45.546	45.0242	3.40763	39.6928	39.0519	38.251	37.2419	37.2843	38.3044	0.965255	1.17543	2.683	0.0146069	0.00772443
cochlear nerve	2.06411	1.71938	1.84746	1.95837	2.1007	1.938	0.140558	1.67476	1.72072	1.62793	1.64305	1.63272	1.65984	0.034539	1.16759	2.718	0.0148676	0.00782881
Vascular organ of the lamina terminalis	0.0191153	0.0163848	0.0163855	0.0191161	0.0201399	0.0182283	0.00155073	0.0126307	0.0153605	0.0160437	0.0133137	0.0167266	0.0148151	0.0015803	1.23039	2.18	0.0150493	0.00793319
Primary somatosensory area mouth layer 4	0.386402	0.339984	0.344778	0.384711	0.375491	0.366273	0.019916	0.315767	0.363874	0.30722	0.310654	0.302786	0.32006	0.022315	1.14439	2.185	0.0151199	0.00803758
Cerebral nuclei	63.0377	50.7006	52.767	54.2002	55.5545	55.252	4.21202	48.7964	48.2331	46.9422	45.6193	45.7292	47.064	1.28464	1.17398	2.63	0.0151324	0.00814196
Agranular insular area dorsal part layer 5	0.723991	0.623645	0.627427	0.651995	0.704557	0.666323	0.0408093	0.60559	0.593599	0.564944	0.588535	0.585773	0.587688	0.0132446	1.1338	2.592	0.0154055	0.00824635
Orbital area lateral part	2.00403	1.74771	1.82015	1.87372	1.92217	1.87356	0.0872658	1.76727	1.68385	1.69517	1.66763	1.72864	1.70851	0.0355392	1.0966	2.477	0.0156972	0.00835073
Primary somatosensory area mouth layer 5	0.937673	0.783056	0.849997	0.851348	0.838027	0.85202	0.0495839	0.738041	0.810694	0.741083	0.757176	0.747919	0.758983	0.0266784	1.12258	2.337	0.0157806	0.00845511
Orbital area lateral part layer 2/3	0.839707	0.732536	0.759877	0.785466	0.799112	0.783339	0.0362273	0.733603	0.71068	0.716847	0.689583	0.725389	0.715221	0.0149791	1.09524	2.457	0.0160084	0.0085595
Medial amygdalar nucleus posterodorsal part sublayer a	0.188763	0.158045	0.15259	0.167948	0.145076	0.162484	0.015107	0.12972	0.138586	0.136542	0.128017	0.133813	0.133336	0.00398593	1.21861	2.638	0.0160545	0.00866388
Pontine central gray	0.877596	0.731853	0.855459	0.83428	0.903567	0.840551	0.0590256	0.786516	0.712728	0.72265	0.721331	0.710711	0.730787	0.0282506	1.1502	2.372	0.016386	0.00876827
Medial geniculate complex dorsal part	0.300042	0.213343	0.250903	0.254653	0.245093	0.252807	0.027767	0.19936	0.225288	0.181601	0.195609	0.204816	0.201335	0.0142264	1.25565	2.333	0.0165595	0.00887265
Ventral posterolateral nucleus of the thalamus parvicellular part	0.102062	0.0757796	0.0781724	0.081926	0.0812425	0.0838365	0.00937594	0.0645189	0.0730478	0.0665644	0.0597411	0.0689546	0.0665654	0.00443823	1.25946	2.355	0.0170357	0.00897704
Agranular insular area ventral part layer 6a	0.138244	0.118448	0.118453	0.120158	0.131763	0.125413	0.0081182	0.111287	0.103086	0.108551	0.106851	0.1205	0.110055	0.0058601	1.13955	2.169	0.017269	0.00908142
Anterior cingulate area ventral part layer 1	0.925726	0.820263	0.775238	0.861247	0.814473	0.839389	0.0510563	0.788905	0.685421	0.793652	0.718941	0.678964	0.733177	0.0493664	1.14487	2.115	0.0173277	0.0091858
vestibulocochlear nerve	2.1928	1.85865	1.98947	2.12291	2.26694	2.08615	0.145954	1.82428	1.86955	1.78495	1.78677	1.78019	1.80915	0.034064	1.15311	2.614	0.017411	0.00929019
Median preoptic nucleus	0.251571	0.173406	0.198333	0.207546	0.202765	0.206724	0.0253303	0.156347	0.177499	0.162144	0.148841	0.154977	0.159962	0.00973568	1.29233	2.437	0.0174284	0.00939457
Primary somatosensory area barrel field	12.1795	9.88446	10.6031	10.9327	10.78	10.876	0.744202	9.73996	10.2014	9.23504	9.12673	9.27952	9.51654	0.401589	1.14285	2.273	0.0176423	0.00949896
Suprageniculate nucleus	0.129711	0.0938711	0.11265	0.113672	0.113671	0.112715	0.0113647	0.0949008	0.100014	0.0867043	0.0877341	0.0904603	0.0919627	0.00492434	1.22566	2.37	0.0178064	0.00960334
Visceral area layer 1	0.350902	0.341691	0.312348	0.348186	0.350913	0.340808	0.014623	0.324643	0.328032	0.305855	0.305192	0.302786	0.313301	0.0107464	1.0878	2.144	0.0180023	0.00970772
Primary motor area Layer 5	4.14187	3.45548	3.53858	3.89115	3.75491	3.7564	0.246878	3.48163	3.4708	3.21352	3.2506	3.12173	3.30766	0.14392	1.13567	2.221	0.018264	0.00981211
Nucleus of the brachium of the inferior colliculus	0.196273	0.137222	0.163172	0.152246	0.155999	0.160983	0.019575	0.123576	0.13449	0.119474	0.118458	0.128351	0.12487	0.0059424	1.2892	2.496	0.0183407	0.00991649
Primary somatosensory area barrel field layer 5	3.23799	2.52121	2.78007	2.86229	2.77044	2.8344	0.231861	2.43533	2.63143	2.3574	2.33263	2.32534	2.41643	0.114354	1.17297	2.286	0.0185384	0.0100209
Anterodorsal preoptic nucleus	0.0481295	0.0348176	0.0368673	0.0406217	0.0419867	0.0404846	0.00460259	0.0327715	0.0368653	0.0337942	0.0266275	0.0286742	0.0317465	0.00366303	1.27524	2.101	0.0188615	0.0101253
Koelliker-Fuse subnucleus	0.192177	0.174088	0.186726	0.190137	0.209251	0.190476	0.011297	0.175464	0.171014	0.166923	0.161813	0.1758	0.170203	0.00530687	1.11911	2.297	0.0189067	0.0102296
Agranular insular area dorsal part layer 6b	0.0136538	0.0112645	0.0119477	0.0109235	0.0116061	0.0118791	0.00095075	0.0102411	0.0102403	0.0092166	0.0109241	0.0102408	0.0101726	0.000546368	1.16776	2.201	0.019172	0.010334
Primary somatosensory area barrel field layer 4	1.71491	1.43162	1.55048	1.61633	1.52825	1.56832	0.0942402	1.41122	1.534	1.32275	1.33376	1.33711	1.38777	0.0795554	1.1301	2.07	0.0196446	0.0104384
Taenia tecta dorsal part layer 2	0.461497	0.386408	0.444798	0.410313	0.437959	0.428195	0.0266307	0.385748	0.379576	0.363202	0.385415	0.387443	0.380277	0.00894112	1.12601	2.412	0.0196848	0.0105428
Primary somatosensory area lower limb layer 5	1.24454	0.998106	1.0415	1.12136	1.03396	1.0879	0.0880693	0.964369	1.00731	0.895035	0.881437	0.909041	0.931438	0.0472605	1.16797	2.214	0.0197481	0.0106472
Medial septal nucleus	0.8025	0.565275	0.655078	0.657456	0.621608	0.660383	0.0784642	0.519565	0.574484	0.472436	0.49568	0.543786	0.52119	0.0357242	1.26707	2.283	0.019818	0.0107516
stria terminalis	1.11108	0.793637	0.881402	0.882412	0.816521	0.89701	0.112646	0.688201	0.766661	0.708313	0.641449	0.674527	0.69583	0.0415745	1.28912	2.369	0.0198824	0.0108559
Striatum ventral region	10.4997	8.77063	9.35816	9.56418	9.87984	9.61451	0.571739	9.20674	8.65412	8.59841	8.31221	8.22233	8.59876	0.345403	1.11813	2.151	0.0203079	0.0109603
Superior central nucleus raphe lateral part	0.388791	0.30346	0.321906	0.377542	0.351596	0.348659	0.0322867	0.30894	0.316085	0.290494	0.266616	0.275136	0.291454	0.0189556	1.19627	2.161	0.0203419	0.0110647
Agranular insular area ventral part	1.47734	1.25173	1.2767	1.31969	1.45008	1.35511	0.0917042	1.22244	1.17525	1.18758	1.16615	1.18896	1.18807	0.0191188	1.14059	2.522	0.0203995	0.0111691
fimbria	2.78639	1.85933	2.07242	2.05293	1.89418	2.13305	0.337323	1.61877	1.63846	1.5163	1.35049	1.52417	1.52964	0.102067	1.39448	2.421	0.0204958	0.0112735
Pallidum	11.7842	9.46528	9.57049	10.3107	10.0085	10.2279	0.835574	9.10365	9.18115	8.69126	8.37741	8.4449	8.75967	0.330411	1.16761	2.311	0.0208882	0.0113779
Ventral tegmental nucleus	0.0737304	0.0580294	0.0604215	0.0617859	0.0710019	0.0649938	0.00619877	0.0570087	0.0573459	0.0525688	0.0512067	0.0525694	0.0541399	0.00253171	1.20048	2.292	0.0210682	0.0114823
Pallidum ventral region	4.32859	3.66131	3.73487	3.96897	4.00648	3.94005	0.234949	3.75199	3.54009	3.59686	3.4206	3.30812	3.52353	0.151555	1.11821	2.107	0.0211028	0.0115866
Substantia innominata	3.90566	3.30563	3.35083	3.58017	3.61461	3.55138	0.214921	3.37341	3.19738	3.23537	3.0782	2.97017	3.17091	0.137663	1.11999	2.108	0.0211476	0.011691
Primary somatosensory area lower limb layer 4	0.392205	0.357052	0.348533	0.394269	0.361154	0.370642	0.0189036	0.334542	0.367628	0.32224	0.307581	0.32395	0.331188	0.0201439	1.11913	2.02	0.021356	0.0117954
Gustatory areas	2.66283	2.31879	2.32708	2.45846	2.64482	2.4824	0.148594	2.294	2.28565	2.23144	2.1459	2.16251	2.2239	0.0610513	1.11623	2.276	0.0215721	0.0118998
fiber tracts	50.3551	39.3678	42.8456	44.2397	46.9534	44.7523	3.71825	38.7407	39.3991	38.5749	36.3424	37.8124	38.1739	1.04577	1.17233	2.409	0.0215771	0.0120042
Primary somatosensory area upper limb layer 4	0.794991	0.665631	0.693993	0.779663	0.699778	0.726811	0.0509755	0.613783	0.725699	0.588497	0.600142	0.591235	0.623871	0.0516726	1.165	2.006	0.021937	0.0121086
Olfactory tubercle pyramidal layer	1.41146	1.21111	1.28728	1.33096	1.38829	1.32582	0.0719817	1.3054	1.18925	1.18997	1.13098	1.09611	1.18234	0.0711657	1.12135	2.005	0.021985	0.0122129
Gustatory areas layer 6a	0.555708	0.451264	0.479275	0.475854	0.525004	0.497421	0.0376381	0.440025	0.427023	0.423622	0.421943	0.438988	0.43032	0.00768434	1.15593	2.47	0.0219904	0.0123173
Posterior amygdalar nucleus	0.421901	0.3591	0.321224	0.386076	0.357057	0.369072	0.0335063	0.311329	0.341345	0.305513	0.304168	0.293911	0.311253	0.0160589	1.18576	2.201	0.0220102	0.0124217
Orbital area ventrolateral part layer 1	0.358411	0.342032	0.352629	0.363888	0.345793	0.352551	0.00799003	0.343418	0.327691	0.324971	0.329771	0.34887	0.334944	0.00942931	1.05257	2.015	0.0221016	0.0125261
Anterior cingulate area ventral part	3.21103	2.64273	2.6425	2.75681	2.72299	2.79521	0.21268	2.53569	2.27916	2.64312	2.36029	2.27892	2.41943	0.145925	1.15532	2.06	0.0222448	0.0126305
Taenia tecta dorsal part layer 1	0.425315	0.36183	0.420219	0.403827	0.400409	0.40232	0.022336	0.376872	0.37821	0.335553	0.352302	0.36901	0.362389	0.016284	1.11019	2.043	0.0222506	0.0127349
Agranular insular area dorsal part layer 6a	0.253277	0.209589	0.224959	0.228369	0.241679	0.231575	0.0149033	0.202774	0.203442	0.204472	0.205509	0.207547	0.204749	0.00167889	1.13102	2.53	0.0222637	0.0128392
Laterodorsal tegmental nucleus	0.194566	0.158727	0.186043	0.174776	0.197645	0.182351	0.0142281	0.173074	0.157701	0.152245	0.159423	0.145078	0.157504	0.00925453	1.15776	2.07	0.0225619	0.0129436
Primary somatosensory area	37.9759	30.4364	32.588	33.6586	33.3006	33.5919	2.46064	30.0419	31.2187	28.5568	28.4743	28.566	29.3715	1.09354	1.14369	2.217	0.0225844	0.013048
Rostral linear nucleus raphe	0.0628073	0.0409619	0.0488151	0.0471075	0.0512033	0.050179	0.00716621	0.0392575	0.0392547	0.0419867	0.0365274	0.0324292	0.0378911	0.00323089	1.3243	2.211	0.022588	0.0131524
Paraventricular hypothalamic nucleus parvicellular division periventricular part	0.0679275	0.0501784	0.0454014	0.0539346	0.0512033	0.053729	0.00761544	0.0440367	0.0413027	0.0395973	0.0385757	0.0385736	0.0404172	0.00206626	1.32936	2.386	0.0226302	0.0132568
Parasubiculum	1.62753	1.15922	1.31664	1.27054	1.47704	1.37019	0.164284	1.01796	1.08821	1.11418	1.07807	1.11147	1.08198	0.0348101	1.26638	2.427	0.0231111	0.0133612
optic chiasm	0.0334517	0.0293561	0.0266264	0.0307223	0.0375491	0.0315411	0.00372412	0.0266268	0.0242355	0.0276498	0.0235551	0.0238952	0.0251925	0.00163559	1.252	2.207	0.0231255	0.0134656
Septohippocampal nucleus	0.0890908	0.0658804	0.0805619	0.072368	0.0689537	0.075371	0.00843149	0.065543	0.05837	0.0580305	0.0583756	0.064517	0.0609672	0.00333541	1.23625	2.247	0.0231771	0.0135699
Subparafascicular nucleus	0.52806	0.376167	0.416123	0.393586	0.414064	0.4256	0.0532717	0.365948	0.363874	0.319168	0.305192	0.322926	0.335421	0.0248015	1.26885	2.17	0.0236903	0.0136743
corticospinal tract	6.17526	4.71813	4.7197	5.1808	4.87011	5.1328	0.547837	4.32618	4.55491	4.20414	3.92004	4.01405	4.20386	0.225733	1.22097	2.217	0.0237146	0.0137787
Anterior tegmental nucleus	0.032769	0.0242358	0.0293573	0.0245778	0.0290152	0.027991	0.00320926	0.0245786	0.0218461	0.0242363	0.0225309	0.0194575	0.0225299	0.00184478	1.2424	2.086	0.0237951	0.0138831
Agranular insular area	6.03701	5.26805	5.31402	5.59862	5.97201	5.63794	0.320673	5.2588	5.08092	5.13467	5.01996	4.95654	5.09018	0.103236	1.10761	2.299	0.0238801	0.0139875
Agranular insular area posterior part layer 5	0.412002	0.362172	0.370039	0.38437	0.405188	0.386754	0.0193219	0.365266	0.357729	0.354327	0.350254	0.342725	0.35406	0.00751094	1.09234	2.23	0.0240515	0.0140919
Gustatory areas layer 5	0.728429	0.61716	0.633231	0.659163	0.706946	0.668986	0.0425095	0.61071	0.608959	0.580305	0.585121	0.597038	0.596427	0.0122409	1.12166	2.32	0.024349	0.0141962
Nucleus raphe pontis	0.0651967	0.0546159	0.0570078	0.0672476	0.0727086	0.0633553	0.00667373	0.0593983	0.0505191	0.0525688	0.048817	0.0491558	0.0520918	0.00388409	1.21623	2.063	0.0246761	0.0143006
Visceral area layer 2/3	0.467642	0.45024	0.417488	0.443425	0.480287	0.451816	0.0215049	0.438319	0.422244	0.403141	0.408629	0.40417	0.4153	0.0133738	1.08793	2.039	0.0247138	0.014405
optic tract	1.05066	0.840744	0.847266	0.9046	0.84895	0.898443	0.0795048	0.754086	0.803867	0.771464	0.741131	0.746895	0.763489	0.0226172	1.17676	2.309	0.0248618	0.0145094
Somatosensory areas	44.9711	36.3742	38.6844	39.9441	39.8068	39.9561	2.81495	36.1773	37.4592	34.2373	34.0398	34.4142	35.2656	1.33627	1.13301	2.129	0.0251466	0.0146138
Supragenual nucleus	0.0256008	0.0191156	0.0252609	0.0238951	0.0273084	0.0242362	0.00278165	0.0197994	0.0191153	0.0211641	0.0177516	0.0201402	0.0195941	0.00113394	1.23691	2.185	0.025168	0.0147182
Olfactory tubercle polymorph layer	1.0667	0.954413	1.00429	1.02578	1.07356	1.02495	0.0436098	1.02172	0.932213	0.941459	0.885875	0.873881	0.931029	0.0522298	1.10088	1.952	0.0254001	0.0148225
internal capsule	3.30285	2.51028	2.4882	2.79948	2.51374	2.72291	0.311846	2.25543	2.39658	2.21062	2.03325	2.12223	2.20362	0.122979	1.23565	2.191	0.0254466	0.0149269
Medial septal complex	2.13613	1.69207	1.77612	1.83207	1.79348	1.84597	0.152123	1.63926	1.69478	1.53678	1.51777	1.57811	1.59334	0.0656357	1.15856	2.156	0.0255121	0.0150313
Agranular insular area posterior part	1.57326	1.44971	1.38969	1.51973	1.60573	1.50762	0.0791721	1.44024	1.38381	1.40092	1.34639	1.30502	1.37528	0.046306	1.09623	2.041	0.0256688	0.0151357
Reticular nucleus of the thalamus	2.11087	1.58318	1.5672	1.79691	1.5716	1.72595	0.211002	1.40439	1.52718	1.35621	1.2293	1.36441	1.3763	0.0956106	1.25405	2.135	0.0256719	0.0152401
Olfactory tubercle	4.56172	3.89685	4.12607	4.25299	4.42874	4.25327	0.232014	4.19612	3.85174	3.84162	3.60905	3.53922	3.80755	0.230436	1.11706	1.928	0.0260021	0.0153445
Primary somatosensory area unassigned	3.56329	2.90864	3.0733	3.18931	3.19577	3.18606	0.215447	2.86887	2.9342	2.7899	2.76072	2.77696	2.82613	0.0655967	1.12736	2.26	0.0260095	0.0154489
Nucleus of the solitary tract commissural part	0.0675862	0.0655391	0.0672487	0.0686131	0.0761222	0.0690218	0.00368555	0.0634948	0.0665623	0.0552996	0.0607652	0.0631515	0.0618547	0.00376002	1.11587	1.925	0.0261558	0.0155532
superior cerebellar peduncle decussation	0.393911	0.2782	0.309276	0.323608	0.321556	0.32531	0.0379462	0.29153	0.270345	0.26182	0.25023	0.240317	0.262848	0.0175884	1.23763	2.112	0.0263144	0.0156576
ventral tegmental decussation	0.13961	0.0983086	0.118112	0.112648	0.117085	0.117153	0.0132713	0.108556	0.097966	0.0955796	0.0867099	0.0860226	0.0949667	0.00827283	1.23362	2.006	0.0263316	0.015762
Parabrachial nucleus lateral division central lateral part	0.218802	0.174771	0.196967	0.197305	0.21403	0.200375	0.0155087	0.185705	0.18023	0.171019	0.17581	0.161122	0.174777	0.00837632	1.14646	2.054	0.0264135	0.0158664
Nucleus accumbens	5.45058	4.46451	4.8187	4.85856	4.97491	4.91345	0.318066	4.60235	4.40062	4.33795	4.30716	4.29157	4.38793	0.113526	1.11977	2.201	0.0264648	0.0159708
Lateral septal nucleus caudal (caudodorsal) part	1.21075	0.766671	0.933631	0.897773	0.818569	0.925478	0.154183	0.686153	0.653334	0.683394	0.647594	0.64517	0.663129	0.0178919	1.39562	2.39	0.0266585	0.0160752
Lateral septal nucleus rostral (rostroventral) part	2.92122	2.05902	2.50527	2.24853	2.27342	2.40149	0.295965	1.8789	1.95966	1.86722	1.85232	1.95565	1.90275	0.0456343	1.26212	2.355	0.0271118	0.0161795
Infralimbic area layer 6a	0.418829	0.360806	0.392569	0.381297	0.384366	0.387574	0.0188045	0.363217	0.318133	0.383001	0.322261	0.338287	0.34498	0.0247382	1.12347	1.938	0.027113	0.0162839
Parasubiculum layer 2	0.846875	0.601116	0.677949	0.654726	0.786141	0.713361	0.0899042	0.535609	0.569705	0.579963	0.556446	0.569729	0.56229	0.0152885	1.26867	2.343	0.0271818	0.0163883
Lateral septal complex	5.03312	3.40837	4.12163	3.77884	3.702	4.00879	0.560265	3.08564	3.13321	3.01793	2.98228	3.10876	3.06556	0.0566582	1.30769	2.369	0.0277017	0.0164927
Dorsal auditory area layer 1	0.299359	0.249526	0.263533	0.272745	0.287421	0.274517	0.017504	0.25432	0.245086	0.235877	0.236916	0.258068	0.246053	0.00895187	1.11568	2.047	0.0277125	0.0165971
Claustrum	1.22099	1.01244	1.08042	1.06572	1.17494	1.1109	0.076007	0.999872	0.990242	0.975253	0.95893	0.998818	0.984623	0.0155789	1.12825	2.302	0.027767	0.0167015
Lateral septal nucleus	4.3064	2.93185	3.56794	3.26373	3.22171	3.45833	0.469526	2.66883	2.72325	2.64653	2.60062	2.70698	2.66924	0.0437418	1.29562	2.366	0.0279167	0.0168058
Magnocellular nucleus	0.422926	0.355686	0.384035	0.388807	0.391876	0.388666	0.0214157	0.378579	0.34271	0.361496	0.342402	0.337946	0.352627	0.0153009	1.1022	1.936	0.0280472	0.0169102
Septofimbrial nucleus	0.637631	0.410643	0.473131	0.442742	0.411333	0.475096	0.0844845	0.351269	0.351585	0.313365	0.323285	0.337263	0.335353	0.0151631	1.4167	2.302	0.0284858	0.0170146
Pallidum medial region	2.53516	1.92385	2.05774	2.10106	2.05223	2.13401	0.209133	1.84442	1.90368	1.72555	1.71918	1.78292	1.79515	0.0706703	1.18876	2.171	0.0285143	0.017119
Midbrain behavioral state related	2.13306	1.59444	1.69282	1.76619	1.80679	1.79866	0.182126	1.63141	1.56575	1.52381	1.39692	1.41186	1.50595	0.0898604	1.19437	2.038	0.0288398	0.0172234
Agranular insular area posterior part layer 2/3	0.429752	0.398696	0.389497	0.436256	0.451954	0.421231	0.0234827	0.401109	0.389816	0.390852	0.37415	0.358428	0.382871	0.014954	1.10019	1.949	0.0291541	0.0173278
Primary somatosensory area lower limb	4.15655	3.30665	3.43651	3.69759	3.56375	3.63221	0.292636	3.30412	3.35747	3.09439	3.01505	3.05141	3.16449	0.139119	1.1478	2.041	0.0293568	0.0174322
Bed nucleus of the anterior commissure	0.0177499	0.0133126	0.0146787	0.0129716	0.0136542	0.0144734	0.00173502	0.0126307	0.0129711	0.0109234	0.0102413	0.0116062	0.0116745	0.00102159	1.23974	1.966	0.0295455	0.0175365
cerebal peduncle	2.63347	1.92999	2.0277	2.08297	2.06725	2.14828	0.248367	1.80824	1.89105	1.7334	1.66422	1.65867	1.75111	0.0886076	1.2268	2.13	0.0296649	0.0176409
Primary somatosensory area nose	1.69614	1.45312	1.52146	1.54738	1.57979	1.55958	0.0799897	1.46516	1.5166	1.38625	1.3918	1.38421	1.4288	0.0532881	1.09153	1.924	0.0298498	0.0177453
Taenia tecta	1.86476	1.54358	1.79353	1.69143	1.72418	1.7235	0.107943	1.58191	1.57599	1.48558	1.5205	1.59893	1.55258	0.0426019	1.11009	2.083	0.0304404	0.0178497
Primary somatosensory area unassigned layer 4	0.323594	0.265911	0.275481	0.294934	0.293224	0.290629	0.0197606	0.260465	0.278537	0.252945	0.251937	0.252606	0.259298	0.010108	1.12083	1.996	0.0304545	0.0179541
Brain stem	142.771	117.599	114.693	129.862	131.732	127.332	10.1844	116.531	115.76	111.721	105.357	106.865	111.247	4.52563	1.14459	2.041	0.030596	0.0180585
Primary somatosensory area trunk layer 4	0.737645	0.569712	0.632889	0.624003	0.61717	0.636284	0.055197	0.564967	0.565267	0.529101	0.541425	0.539348	0.548022	0.0145689	1.16106	2.187	0.0306731	0.0181628
Ventral posterior complex of the thalamus	3.16187	2.26281	2.41276	2.54005	2.42226	2.55995	0.313568	2.12776	2.27609	1.98328	1.89123	2.04645	2.06496	0.130931	1.23971	2.06	0.0306828	0.0182672
Midbrain trigeminal nucleus	0.126297	0.0969432	0.106164	0.104456	0.108551	0.108482	0.00971718	0.0989972	0.0925045	0.0948969	0.089441	0.0897776	0.0931234	0.00354358	1.16493	2.1	0.0308168	0.0183716
anterior commissure temporal limb	0.237917	0.190473	0.192188	0.196622	0.218126	0.207065	0.0183295	0.177512	0.180913	0.184332	0.180589	0.166925	0.178054	0.00596932	1.16293	2.128	0.0310164	0.018476
Anterior olfactory nucleus	5.3772	4.73247	4.92896	5.11116	5.12988	5.05593	0.21563	4.899	4.6638	4.73529	4.45054	4.77903	4.70553	0.148646	1.07447	1.892	0.0313098	0.0185804
Central amygdalar nucleus medial part	0.696342	0.614429	0.542086	0.654726	0.619218	0.62536	0.0509755	0.550629	0.57858	0.548217	0.518553	0.531497	0.545495	0.0202494	1.14641	2.059	0.0315755	0.0186848
Lateral mammillary nucleus	0.0853361	0.0710007	0.0686142	0.0699785	0.0720259	0.0733911	0.00607823	0.0686153	0.0638315	0.0648576	0.0645204	0.055983	0.0635615	0.00413877	1.15465	1.89	0.0316204	0.0187891
Parasubiculum layer 3	0.452622	0.314724	0.341023	0.352965	0.391876	0.370642	0.0479338	0.270706	0.299018	0.289128	0.299047	0.319171	0.295414	0.0157517	1.25465	2.109	0.0318857	0.0188935
Agranular insular area dorsal part	2.98642	2.56661	2.64762	2.7592	2.9162	2.77521	0.157821	2.59612	2.52186	2.54617	2.50742	2.46257	2.52683	0.0440586	1.0983	2.144	0.0321287	0.0189979
Central amygdalar nucleus lateral part	0.280585	0.225973	0.214377	0.239975	0.228367	0.237855	0.0228595	0.195263	0.217778	0.200717	0.194244	0.203109	0.202222	0.0084512	1.17621	2.068	0.0322876	0.0191023
root	593.122	469.696	493.954	520.759	549.655	525.437	43.0996	464.334	473.891	458.793	440.748	450.48	457.649	11.3741	1.14812	2.151	0.0323808	0.0192067
Basic cell groups and regions	593.099	469.676	493.936	520.735	549.632	525.415	43.0981	464.316	473.873	458.777	440.733	450.462	457.632	11.3732	1.14812	2.151	0.0323849	0.0193111
Medial amygdalar nucleus	2.11258	1.78594	1.63104	1.83514	1.70541	1.81402	0.164712	1.5563	1.61251	1.58389	1.52459	1.49584	1.55463	0.0413962	1.16685	2.16	0.0324032	0.0194154
Striatum-like amygdalar nuclei	5.31575	4.51639	4.13426	4.6988	4.52569	4.63818	0.385798	4.04045	4.22107	4.12153	3.88181	3.91813	4.0366	0.125901	1.14903	2.096	0.0326067	0.0195198
Lobule II molecular layer	0.96737	0.783397	0.964012	0.908696	1.02065	0.928825	0.0808832	0.825432	0.806939	0.805599	0.778	0.789223	0.801039	0.0162544	1.15953	2.191	0.0327038	0.0196242
Subgeniculate nucleus	0.0256008	0.021505	0.0232128	0.02765	0.0245776	0.0245092	0.00208648	0.0208235	0.0235528	0.0218468	0.0187758	0.0204816	0.0210961	0.001577	1.16179	1.846	0.0330862	0.0197286
Anterior cingulate area	6.19608	5.26975	5.16143	5.60613	5.55931	5.55854	0.360505	5.2052	4.86587	5.32856	4.87317	4.61962	4.97848	0.255544	1.11651	1.856	0.0332626	0.019833
Median eminence	0.0457401	0.0433514	0.0416464	0.0518865	0.0488138	0.0462876	0.00369299	0.0447194	0.0409614	0.04028	0.0314067	0.0361841	0.0387103	0.00454674	1.19574	1.829	0.0333717	0.0199374
Primary motor area	13.4326	11.2662	11.5842	12.5094	12.4636	12.2512	0.764523	11.5178	11.4306	11.0097	10.8486	10.5535	11.0721	0.360552	1.1065	1.973	0.033381	0.0200418
Olfactory tubercle molecular layer	1.75178	1.45483	1.52658	1.58629	1.67571	1.59904	0.105277	1.57167	1.44525	1.43096	1.33001	1.31662	1.4189	0.0922385	1.12695	1.82	0.0333873	0.0201461
Islands of Calleja	0.281609	0.246113	0.267971	0.271039	0.257382	0.264823	0.0121305	0.260124	0.249523	0.242704	0.228382	0.216763	0.239499	0.0153404	1.10574	1.831	0.0335407	0.0202505
Central amygdalar nucleus	1.59305	1.38861	1.23232	1.45624	1.40229	1.4145	0.116302	1.23746	1.3193	1.24458	1.17502	1.20363	1.236	0.0485392	1.14442	2.003	0.0338605	0.0203549
Anterior cingulate area ventral part 6b	0.0737304	0.0679285	0.0689556	0.059055	0.0648575	0.0669054	0.00485083	0.0604224	0.0501777	0.0658816	0.0580342	0.0535935	0.0576219	0.0054384	1.16111	1.802	0.0346439	0.0204593
tectospinal pathway	0.313354	0.247137	0.24783	0.265577	0.283325	0.271445	0.0248212	0.245786	0.239624	0.232122	0.218482	0.231783	0.233559	0.0091524	1.16221	2.025	0.0346913	0.0205637
Primary somatosensory area mouth layer 2/3	0.938014	0.879658	0.86092	0.921327	0.916197	0.903223	0.0284651	0.834307	0.920949	0.792969	0.784145	0.789223	0.824319	0.0515083	1.09572	1.896	0.0351278	0.0206681
Somatomotor areas	23.9095	20.8104	20.6829	23.2486	22.8151	22.2933	1.31067	21.0833	20.9968	20.479	19.7712	19.0683	20.2797	0.764943	1.09929	1.876	0.035383	0.0207724
Dorsal auditory area layer 2/3	0.762222	0.622621	0.656443	0.680327	0.715822	0.687487	0.0481885	0.627779	0.619882	0.5943	0.605604	0.621616	0.613836	0.0121729	1.11998	2.096	0.0356647	0.0208768
Primary somatosensory area nose layer 6b	0.0727063	0.0624669	0.0682728	0.0611032	0.0720259	0.067315	0.00478052	0.0624706	0.0597354	0.055641	0.0638376	0.0580311	0.0599431	0.00295848	1.12298	1.854	0.0357881	0.0209812
Agranular insular area ventral part layer 2/3	0.585405	0.484716	0.491223	0.510331	0.572111	0.528757	0.0418964	0.473138	0.46457	0.457758	0.464274	0.460835	0.464115	0.00515403	1.13928	2.166	0.0361092	0.0210856
Medial amygdalar nucleus anterodorsal part	0.932552	0.801147	0.720961	0.82916	0.787506	0.814265	0.0690036	0.712097	0.73082	0.721967	0.699142	0.683061	0.709417	0.0168701	1.14779	2.087	0.0364363	0.02119
Primary somatosensory area trunk layer 1	0.449892	0.364561	0.384717	0.408265	0.415088	0.404505	0.0288899	0.369703	0.382306	0.340332	0.36186	0.350918	0.361024	0.0145553	1.12044	1.901	0.0366944	0.0212944
Entorhinal area medial part dorsal zone layer 2	1.17149	0.940076	1.04287	1.07391	1.24697	1.09506	0.105934	0.882099	0.913439	0.969109	0.934351	0.980385	0.935877	0.0360087	1.17009	2.012	0.036748	0.0213987
Secondary motor area layer 6a	1.619	1.34082	1.3105	1.49822	1.4866	1.45103	0.112783	1.32178	1.30769	1.30978	1.2648	1.20602	1.28202	0.042621	1.13183	1.982	0.0368574	0.0215031
Primary somatosensory area nose layer 2/3	0.447161	0.393917	0.410661	0.44479	0.441031	0.427512	0.0213538	0.396672	0.422585	0.388121	0.38405	0.378568	0.393999	0.0154658	1.08506	1.798	0.0372738	0.0216075
Primary somatosensory area lower limb layer 2/3	0.883399	0.781349	0.742808	0.858858	0.825055	0.818294	0.0509761	0.776616	0.798064	0.705241	0.688559	0.698763	0.733449	0.0448386	1.11568	1.767	0.0374282	0.0217119
Entorhinal area medial part dorsal zone layer 1	1.14862	0.979332	1.07257	1.11692	1.25789	1.11507	0.0913885	0.939449	0.964641	1.00359	0.969513	1.01316	0.978069	0.0269338	1.14007	2.034	0.0374544	0.0218163
Primary somatosensory area unassigned layer 5	1.08274	0.85747	0.910077	0.978675	0.944188	0.954631	0.075532	0.83499	0.866333	0.849634	0.834327	0.817556	0.840568	0.0164052	1.1357	2.087	0.037488	0.0219207
Primary somatosensory area lower limb layer 1	0.317791	0.290147	0.289477	0.332483	0.323946	0.310769	0.0177374	0.296309	0.303456	0.275815	0.261495	0.265236	0.280462	0.0166912	1.10806	1.76	0.0377058	0.0220251
Agranular insular area dorsal part layer 2/3	1.29062	1.1029	1.14664	1.18417	1.24424	1.19372	0.0670791	1.11355	1.09333	1.11589	1.07329	1.07119	1.09345	0.0190242	1.0917	2.034	0.0379234	0.0221294
Lobule II	1.76373	1.4306	1.77407	1.67027	1.88326	1.70438	0.152641	1.52319	1.47017	1.48626	1.44198	1.44941	1.4742	0.0290326	1.15614	2.095	0.0379819	0.0222338
Interstitial nucleus of Cajal	0.0849947	0.0529092	0.0621283	0.0621272	0.0692951	0.0662909	0.0107013	0.0553019	0.0488123	0.0498379	0.0484756	0.0488144	0.0502484	0.00256778	1.31926	2.062	0.0380768	0.0223382
Cortical subplate	8.92991	7.72713	7.09799	7.99086	8.20174	7.98952	0.59884	7.12438	7.50788	6.95137	6.95318	6.96613	7.10059	0.21379	1.12519	1.977	0.0381446	0.0224426
Agranular insular area posterior part layer 1	0.433849	0.431124	0.377207	0.426357	0.459464	0.4256	0.0267871	0.408278	0.377869	0.400752	0.379612	0.343408	0.381984	0.0226022	1.11418	1.76	0.0383861	0.022547
Entorhinal area medial part dorsal zone	4.36272	3.35649	3.76149	3.81673	4.42464	3.94442	0.400255	3.17269	3.3148	3.46715	3.32468	3.46958	3.34978	0.110763	1.17751	2.025	0.0387455	0.0226514
Orbital area ventrolateral part layer 2/3	0.69327	0.608285	0.643471	0.649264	0.643454	0.647549	0.0270867	0.627096	0.60657	0.592252	0.61209	0.60011	0.607624	0.0117726	1.06571	1.912	0.0389288	0.0227557
Cuneiform nucleus	0.401079	0.30346	0.360481	0.350917	0.378563	0.3589	0.0325748	0.318839	0.326667	0.295614	0.313043	0.300055	0.310844	0.0115541	1.1546	1.966	0.0389455	0.0228601
Subceruleus nucleus	0.0382306	0.0337936	0.0314055	0.0337945	0.0355009	0.034545	0.0022575	0.0344783	0.0266249	0.0266257	0.0324309	0.026626	0.0293572	0.00340761	1.17671	1.795	0.0390156	0.0229645
Dorsal peduncular area layer 1	0.0925043	0.0802171	0.0928511	0.0925081	0.0887523	0.0893666	0.00481552	0.0733945	0.069293	0.0870457	0.0662273	0.086364	0.0764649	0.00866738	1.16873	1.84	0.0390247	0.0230689
Gustatory areas layer 2/3	0.623295	0.570395	0.547889	0.607959	0.637651	0.597438	0.0334148	0.570087	0.562878	0.564602	0.50797	0.519208	0.544949	0.0259603	1.09632	1.754	0.0397983	0.0231733
brachium of the inferior colliculus	0.6349	0.400744	0.478251	0.465954	0.558116	0.507593	0.0809581	0.388137	0.412003	0.373443	0.380295	0.38164	0.387104	0.0132958	1.31126	2.077	0.0398461	0.0232777
Bed nuclei of the stria terminalis anterior division oval nucleus	0.113668	0.0812412	0.0897788	0.0853396	0.0877283	0.0915511	0.0114173	0.0713463	0.0788507	0.0723674	0.0744203	0.0764645	0.0746898	0.00272426	1.22575	2.032	0.0399199	0.023382
cerebellar commissure	0.331787	0.30858	0.409637	0.347503	0.472777	0.374057	0.0596501	0.280264	0.3096	0.273426	0.266275	0.302786	0.28647	0.0168387	1.30574	1.998	0.0401518	0.0234864
Triangular nucleus of septum	0.399031	0.231776	0.281625	0.26899	0.258747	0.288034	0.0578737	0.205163	0.208903	0.18877	0.201413	0.204816	0.201813	0.00693971	1.42723	2.092	0.0401738	0.0235908
Taenia tecta dorsal part layer 4	0.120836	0.101722	0.116064	0.109576	0.0972862	0.109097	0.00872297	0.0959249	0.0955766	0.0890938	0.101048	0.100018	0.0963323	0.00421795	1.13251	1.863	0.0402493	0.0236952
Substantia nigra compact part	0.622612	0.439317	0.474838	0.483022	0.509302	0.505818	0.0625377	0.461873	0.413027	0.438983	0.388488	0.36662	0.413798	0.0340954	1.22238	1.827	0.0404372	0.0237996
Diagonal band nucleus	1.33363	1.12679	1.12104	1.17461	1.17187	1.18559	0.0772641	1.11969	1.12029	1.06435	1.02208	1.03432	1.07215	0.0414166	1.10581	1.83	0.0405627	0.023904
Endopiriform nucleus dorsal part	2.68297	2.25188	2.21238	2.35879	2.49496	2.4002	0.172003	2.19057	2.18222	2.10343	2.14044	2.12462	2.14826	0.0333842	1.11728	2.034	0.0414756	0.0240084
Primary somatosensory area barrel field layer 6a	2.65532	2.00713	2.18951	2.13451	2.26284	2.24986	0.219283	1.97994	2.01735	1.94607	1.81784	1.89864	1.93197	0.0691766	1.16455	1.955	0.0414957	0.0241127
Basomedial amygdalar nucleus posterior part	0.949961	0.878975	0.705941	0.893676	0.882061	0.862123	0.0822015	0.73019	0.815473	0.724357	0.713138	0.732899	0.743211	0.0367629	1.16	1.868	0.0415456	0.0242171
Ventral posteromedial nucleus of the thalamus	1.65688	1.16946	1.27636	1.30911	1.27428	1.33722	0.166604	1.1412	1.20426	1.02099	1.00672	1.10976	1.09659	0.0742267	1.21944	1.866	0.0417541	0.0243215
Entorhinal area lateral part layer 6b	0.249181	0.179891	0.187409	0.20106	0.207885	0.205085	0.0241483	0.174099	0.173062	0.167947	0.167616	0.165901	0.169725	0.0032402	1.20834	2.052	0.0421645	0.0244259
Orbital area lateral part layer 1	0.396642	0.3492	0.35775	0.375494	0.380952	0.372008	0.016867	0.350587	0.348513	0.337601	0.346498	0.355697	0.347779	0.00593882	1.06967	1.916	0.0424894	0.0245303
Interpeduncular nucleus	0.480613	0.394259	0.373111	0.441377	0.418501	0.421572	0.0373683	0.385065	0.387768	0.375833	0.320212	0.361841	0.366144	0.0246889	1.15138	1.75	0.0428308	0.0246347
Primary somatosensory area mouth layer 6a	0.685419	0.493933	0.585781	0.556414	0.58952	0.582213	0.06193	0.521954	0.477883	0.490528	0.493974	0.481317	0.493131	0.0155585	1.18065	1.973	0.0431626	0.024739
Anterior cingulate area ventral part layer 5	0.824005	0.626035	0.659174	0.667014	0.681686	0.691583	0.068679	0.615148	0.569705	0.651648	0.555422	0.57246	0.592876	0.0355155	1.16649	1.805	0.043323	0.0248434
Zona incerta	2.85159	2.07779	2.0376	2.25774	2.17716	2.28038	0.29578	1.94786	1.99311	1.88838	1.69323	1.76961	1.85844	0.111546	1.22704	1.888	0.0433658	0.0249478
Parasolitary nucleus	0.0385719	0.0320868	0.0331123	0.031405	0.0320874	0.0334527	0.00261705	0.0327715	0.0310624	0.0286739	0.0269688	0.0252606	0.0289474	0.00270846	1.15564	1.692	0.0437255	0.0250522
Thalamus sensory-motor cortex related	8.97633	6.17911	6.68664	6.78894	6.70319	7.06684	0.978595	5.86166	6.18858	5.44701	5.23127	5.6379	5.67328	0.331314	1.24563	1.908	0.0437608	0.0251566
Visceral area	2.17505	1.94535	1.90754	2.01777	2.17716	2.04457	0.113087	1.9499	1.93406	1.858	1.83081	1.84607	1.88377	0.0485652	1.08536	1.848	0.0438981	0.025261
Entorhinal area medial part dorsal zone layer 4	0.136879	0.104112	0.110602	0.116403	0.136883	0.120976	0.0135565	0.0938767	0.103428	0.101383	0.104803	0.104797	0.101657	0.00408664	1.19003	1.93	0.0439304	0.0253653
Primary motor area Layer 2/3	4.1603	3.733	3.66557	4.09323	4.05462	3.94134	0.201645	3.72605	3.87392	3.60267	3.52609	3.46378	3.6385	0.146654	1.08323	1.718	0.0440493	0.0254697
Dorsal auditory area layer 4	0.328714	0.261474	0.274798	0.295616	0.296979	0.291516	0.0228579	0.260806	0.271711	0.250555	0.259447	0.25363	0.25923	0.00727886	1.12455	1.903	0.0450323	0.0255741
Anterolateral visual area layer 4	0.274441	0.21744	0.219497	0.220176	0.237583	0.233827	0.0215584	0.201067	0.210268	0.192866	0.210971	0.201744	0.203383	0.00668813	1.14969	1.907	0.0451238	0.0256785
Lobule II granular layer	0.796356	0.647199	0.810057	0.761571	0.862604	0.775557	0.0719327	0.69776	0.663233	0.680663	0.66398	0.660189	0.673165	0.0142302	1.15211	1.975	0.0451723	0.0257829
Entorhinal area medial part dorsal zone layer 6	0.540348	0.350225	0.418171	0.403144	0.475849	0.437547	0.0651448	0.319863	0.353633	0.361496	0.338305	0.351942	0.345048	0.0146389	1.26808	1.959	0.0452075	0.0258873
Central amygdalar nucleus capsular part	0.616126	0.548207	0.475862	0.561535	0.554702	0.551286	0.0447645	0.491572	0.52294	0.495648	0.462225	0.469028	0.488283	0.0215219	1.12903	1.794	0.0459072	0.0259916
Dorsal tegmental nucleus	0.142682	0.120838	0.129718	0.138592	0.1461	0.135586	0.00918553	0.131427	0.121519	0.120499	0.112655	0.124938	0.122207	0.00611736	1.10947	1.714	0.045961	0.026096
Endopiriform nucleus	3.3008	2.82057	2.6978	2.94626	3.11077	2.97524	0.212646	2.71525	2.76012	2.62229	2.65728	2.62642	2.67627	0.053495	1.11171	1.928	0.0462868	0.0262004
Primary somatosensory area unassigned layer 6a	0.704876	0.519875	0.6206	0.55778	0.5844	0.597506	0.0629891	0.536633	0.489147	0.514423	0.490901	0.515453	0.509312	0.01764	1.17316	1.907	0.0465915	0.0263048
Fundus of striatum	0.48744	0.409278	0.413392	0.452641	0.47619	0.447788	0.031839	0.408278	0.401763	0.418843	0.395998	0.391539	0.403284	0.0095955	1.11035	1.893	0.046655	0.0264092
Primary somatosensory area unassigned layer 6b	0.126639	0.0901163	0.0996783	0.0897773	0.105479	0.102338	0.0135248	0.0884147	0.0744132	0.0877284	0.0815893	0.0853399	0.0834971	0.00513109	1.22565	1.842	0.0468117	0.0265136
Entorhinal area lateral part layer 4	0.68815	0.540015	0.569737	0.588843	0.658133	0.608976	0.0554717	0.517175	0.547859	0.523298	0.514115	0.557099	0.531909	0.0173019	1.14489	1.876	0.0474658	0.026618
Agranular insular area ventral part layer 1	0.278196	0.24782	0.249879	0.275818	0.293224	0.268987	0.0175047	0.253979	0.249182	0.252603	0.227699	0.237928	0.244278	0.0100265	1.10115	1.732	0.0474853	0.0267223
Entorhinal area lateral part layer 5	1.66883	1.24968	1.34736	1.37329	1.53473	1.43478	0.148631	1.19514	1.23976	1.21659	1.19653	1.29102	1.22781	0.0355265	1.16857	1.915	0.0477831	0.0268267
optic nerve	1.7825	1.26572	1.34634	1.37909	1.35074	1.42488	0.182748	1.18046	1.24591	1.15822	1.11426	1.15926	1.17162	0.0429415	1.21616	1.908	0.0485198	0.0269311
Orbital area medial part	0.951326	0.930519	0.896764	0.960924	0.942481	0.936403	0.0222119	0.913505	0.906612	0.883429	0.863003	0.928839	0.899078	0.0232249	1.04151	1.643	0.0487597	0.0270355
Infralimbic area layer 6b	0.093187	0.0863614	0.0887547	0.080902	0.0880696	0.0874549	0.00397645	0.0832942	0.0621248	0.0839735	0.079541	0.0689546	0.0755776	0.00860915	1.15715	1.771	0.0487861	0.0271399
Primary somatosensory area nose layer 5	0.448868	0.392552	0.402468	0.407582	0.402116	0.410717	0.0196839	0.390527	0.412345	0.362178	0.355033	0.364913	0.376999	0.0213567	1.08944	1.642	0.048985	0.0272443
Central linear nucleus raphe	0.153605	0.102405	0.113674	0.1106	0.124595	0.120976	0.0177966	0.105825	0.101379	0.0993345	0.0860272	0.0904603	0.0966052	0.00727865	1.25227	1.792	0.0495127	0.0273486
Primary somatosensory area nose layer 6a	0.333152	0.258743	0.28538	0.264211	0.285373	0.285372	0.026229	0.258758	0.247475	0.244411	0.25262	0.243048	0.249262	0.00577568	1.14487	1.901	0.0496417	0.027453
Central lobule	4.73547	3.84359	4.7098	4.66057	5.49548	4.68898	0.523166	3.88342	4.31631	3.95222	3.80261	3.91403	3.97372	0.178227	1.18	1.83	0.0497327	0.0275574
Medial amygdalar nucleus posteroventral part	0.10923	0.0860201	0.0809033	0.0846569	0.0829493	0.0887519	0.0103813	0.0768082	0.0723651	0.0791945	0.0737376	0.0706614	0.0745534	0.00307329	1.19045	1.855	0.0499194	0.0276618
Field CA3 stratum lucidum	0.597011	0.389821	0.43285	0.430112	0.416453	0.453249	0.0734793	0.342052	0.378552	0.343062	0.332161	0.367644	0.352694	0.0174342	1.28511	1.883	0.0503546	0.0277662
Inferior colliculus external nucleus	4.1149	2.62941	3.15386	3.24188	3.88428	3.40487	0.533832	2.79309	2.81439	2.59908	2.62042	2.54176	2.67375	0.109417	1.27344	1.897	0.0505706	0.0278706
Medial preoptic area	1.1022	0.825724	0.791282	0.894018	0.876258	0.897897	0.108442	0.768423	0.810012	0.759175	0.719624	0.696715	0.75079	0.0394559	1.19594	1.803	0.0509096	0.0279749
Entorhinal area	16.0343	12.4456	13.3897	13.8216	15.6122	14.2607	1.35782	12.1173	12.6243	12.5837	12.0756	12.6136	12.4029	0.250939	1.14979	1.903	0.0509291	0.0280793
Crus 1 molecular layer	3.58207	3.1155	3.55838	3.81093	4.41509	3.69639	0.424075	2.9071	3.19499	3.42789	2.94848	3.12617	3.12093	0.18719	1.18439	1.756	0.0512292	0.0281837
Subthalamic nucleus	0.344758	0.230411	0.238614	0.263529	0.263526	0.268167	0.0405169	0.210284	0.220509	0.222223	0.202437	0.208912	0.212873	0.00744344	1.25975	1.898	0.0513211	0.0282881
anterior commissure olfactory limb	1.42102	1.15717	1.18829	1.25483	1.26677	1.25762	0.0913081	1.14188	1.13395	1.10019	1.09992	1.19647	1.13448	0.035405	1.10854	1.778	0.0518856	0.0283925
Orbital area lateral part layer 6a	0.22085	0.184329	0.202429	0.194574	0.213347	0.203106	0.0130042	0.196629	0.178523	0.182284	0.187416	0.182627	0.185496	0.00624168	1.09493	1.726	0.0521203	0.0284969
Anteroventral preoptic nucleus	0.0894322	0.0669045	0.0617869	0.0733921	0.0696364	0.0722304	0.00939586	0.0648602	0.0617834	0.0638335	0.0556446	0.0508626	0.0593969	0.00533182	1.21606	1.68	0.0528881	0.0286013
Subiculum ventral part molecular layer	1.07592	0.790224	0.834294	0.837011	0.928486	0.893186	0.101845	0.733945	0.782363	0.733915	0.748641	0.780689	0.755911	0.0216003	1.1816	1.865	0.0529136	0.0287056
Copula pyramidis granular layer	1.48928	1.21862	1.63309	1.432	1.76037	1.50667	0.183954	1.20162	1.31827	1.2497	1.25798	1.26576	1.25867	0.0372516	1.19704	1.869	0.0529777	0.02881
Primary somatosensory area unassigned layer 2/3	0.909682	0.812753	0.815519	0.88207	0.878989	0.859803	0.0387986	0.806998	0.869406	0.752007	0.779024	0.772497	0.795986	0.0407071	1.08017	1.605	0.0529942	0.0289144
Subparaventricular zone	0.21846	0.148146	0.133815	0.164876	0.152244	0.163508	0.0292102	0.135865	0.129711	0.132446	0.126651	0.095922	0.124119	0.0144226	1.31735	1.71	0.0531021	0.0290188
Anterior olfactory nucleus lateral part	0.79226	0.710348	0.708672	0.77147	0.763611	0.749272	0.0337928	0.722338	0.68781	0.696707	0.650325	0.734606	0.698357	0.0293604	1.07291	1.608	0.0531229	0.0291232
Orbital area ventrolateral part layer 5	0.270345	0.241334	0.246465	0.243047	0.256358	0.25151	0.0107598	0.244762	0.231091	0.236901	0.242378	0.229052	0.236837	0.00611782	1.06195	1.676	0.0532099	0.0292276
Piriform area pyramidal layer	4.42485	3.91118	3.85639	4.2267	4.48438	4.1807	0.257589	3.99949	3.87358	3.8819	3.73331	3.68941	3.83554	0.111606	1.08999	1.739	0.0532459	0.0293319
Field CA3 pyramidal layer	2.68638	1.73235	1.96421	1.92151	1.87814	2.03652	0.334179	1.56928	1.72311	1.5204	1.48738	1.64365	1.58876	0.0853142	1.28183	1.836	0.0534346	0.0294363
Anterior olfactory nucleus layer 1	1.60739	1.38895	1.4607	1.4815	1.54429	1.49656	0.0743697	1.47847	1.38484	1.40877	1.30406	1.37192	1.38961	0.0564227	1.07696	1.62	0.0534535	0.0295407
Ventral tegmental area	1.37425	1.01415	1.00566	1.07084	1.11077	1.11513	0.135134	1.03742	0.950987	0.965695	0.875634	0.832235	0.932395	0.0717485	1.19599	1.689	0.0535123	0.0296451
Lobules IV-V granular layer	3.8193	3.08443	3.78778	3.93723	5.02475	3.9307	0.623856	2.80196	3.52814	3.14457	3.00754	3.01386	3.09921	0.240867	1.26829	1.758	0.0538175	0.0297495
Visceral area layer 6b	0.0829466	0.0723661	0.0716865	0.0733921	0.083632	0.0768047	0.00532689	0.0703221	0.0723651	0.0689538	0.0699824	0.0669065	0.069706	0.00178494	1.10184	1.787	0.0538225	0.0298539
genu of corpus callosum	0.746861	0.533188	0.657126	0.598743	0.692268	0.645637	0.0740225	0.600469	0.444772	0.583377	0.538353	0.535593	0.540513	0.0540873	1.19449	1.622	0.0539222	0.0299582
Bed nuclei of the stria terminalis anterior division juxtacapsular nucleus	0.0201393	0.0143367	0.0180923	0.0174093	0.0184332	0.0176821	0.00189929	0.0136548	0.0174086	0.0139956	0.0150206	0.0150198	0.0150199	0.00131291	1.17725	1.631	0.0539282	0.0300626
Parabrachial nucleus	1.1691	0.982062	1.12036	1.10054	1.19406	1.11322	0.0735829	1.05654	1.02472	0.988566	1.02891	0.977313	1.01521	0.0287484	1.09655	1.755	0.053933	0.030167
habenular commissure	0.0651967	0.0402792	0.0464255	0.0433525	0.0426694	0.0475847	0.00902186	0.0358438	0.0372066	0.0331115	0.0358447	0.0355014	0.0355016	0.00133074	1.34035	1.874	0.0545395	0.0302714
Entorhinal area medial part dorsal zone layer 3	1.02233	0.735267	0.839414	0.831208	0.985833	0.88281	0.106201	0.690249	0.732526	0.784094	0.736693	0.766352	0.741983	0.0321278	1.1898	1.795	0.0547618	0.0303758
Primary somatosensory area upper limb layer 6a	1.41214	1.00698	1.20126	1.1497	1.17972	1.18996	0.130153	1.06746	0.968054	1.04352	1.00843	1.00052	1.0176	0.0346087	1.16938	1.81	0.0552192	0.0304802
ventral hippocampal commissure	0.380599	0.217098	0.245441	0.229734	0.236218	0.261818	0.0601027	0.170343	0.199004	0.166923	0.179565	0.194234	0.182014	0.0127116	1.43845	1.837	0.055278	0.0305846
Midbrain raphe nuclei	0.946889	0.703863	0.728471	0.781028	0.79092	0.790234	0.0847357	0.721655	0.715459	0.696024	0.606287	0.645852	0.677056	0.0442846	1.16716	1.674	0.055479	0.0306889
Perirhinal area layer 1	0.358411	0.302436	0.301425	0.32907	0.349548	0.328178	0.0234518	0.310646	0.300042	0.29971	0.291537	0.284353	0.297258	0.00885776	1.10402	1.744	0.0556167	0.0307933
Bed nuclei of the stria terminalis posterior division strial extension	0.0505189	0.0296974	0.0348191	0.0290155	0.030722	0.0349546	0.00803858	0.0204822	0.0279903	0.0232122	0.0256033	0.0245779	0.0243732	0.00249505	1.43414	1.778	0.0559391	0.0308977
Periventricular region	3.0721	2.28295	2.06594	2.46119	2.38573	2.45358	0.336633	2.11922	2.15832	2.09046	1.88099	1.80067	2.00993	0.142032	1.22073	1.717	0.0559817	0.0310021
Anterior olfactory nucleus dorsal part	0.323594	0.286392	0.302107	0.31405	0.301417	0.305512	0.0126	0.288116	0.290485	0.280936	0.26764	0.30381	0.286197	0.0118686	1.06749	1.578	0.0562662	0.0311065
Crus 1	6.40908	5.65036	6.45178	6.89339	8.02287	6.6855	0.779015	5.25334	5.8073	6.22667	5.32993	5.68432	5.66031	0.351489	1.18112	1.696	0.0566048	0.0312109
Entorhinal area lateral part layer 2/3	0.193542	0.162482	0.155662	0.176482	0.189793	0.175592	0.0147902	0.152592	0.158384	0.160779	0.15362	0.155319	0.156139	0.00303854	1.12459	1.822	0.0568592	0.0313152
Anterior pretectal nucleus	1.43535	0.917547	1.09953	1.0391	1.05342	1.10899	0.173911	0.914529	0.953035	0.824033	0.821013	0.893679	0.881258	0.0516089	1.25842	1.775	0.0568782	0.0314196
Basolateral amygdalar nucleus posterior part	0.554343	0.520899	0.44548	0.529447	0.520225	0.514079	0.0364622	0.456753	0.494609	0.433522	0.471443	0.471418	0.465549	0.0200837	1.10424	1.649	0.0569924	0.031524
Simple lobule molecular layer	3.91454	2.93014	3.59525	3.75085	4.48677	3.73551	0.502985	2.88526	3.19123	3.28964	2.99013	3.02991	3.07723	0.144774	1.21392	1.779	0.0570218	0.0316284
Lingula (I)	0.126297	0.116742	0.153273	0.130058	0.16624	0.138522	0.0183376	0.116748	0.116057	0.109575	0.11641	0.11299	0.114356	0.00274074	1.21132	1.843	0.0570784	0.0317328
Simple lobule	6.77432	5.11956	6.27564	6.55442	7.7829	6.50137	0.857902	5.03691	5.57928	5.79281	5.20464	5.29312	5.38135	0.2706	1.20813	1.761	0.0573098	0.0318372
Culmen	8.46739	6.76657	8.2972	8.6589	11.0138	8.64077	1.36326	6.28939	7.70962	6.97424	6.6852	6.66744	6.86518	0.474972	1.25864	1.739	0.057663	0.0319415
Lobules IV-V	8.46739	6.76657	8.2972	8.6589	11.0138	8.64077	1.36326	6.28939	7.70962	6.97424	6.6852	6.66744	6.86518	0.474972	1.25864	1.739	0.057663	0.0320459
middle cerebellar peduncle	1.4176	1.40568	1.39447	1.61838	1.68595	1.50442	0.122733	1.3112	1.41522	1.3743	1.2549	1.36441	1.34401	0.0555342	1.11935	1.684	0.0578583	0.0321503
Simple lobule granular layer	2.85978	2.18942	2.68039	2.80358	3.29612	2.76586	0.355251	2.15165	2.38805	2.50316	2.21452	2.26321	2.30412	0.126182	1.2004	1.732	0.0580313	0.0322547
midbrain tract of the trigeminal nerve	0.020822	0.0187742	0.0215059	0.018092	0.0221881	0.0202764	0.00158064	0.0177512	0.0160432	0.0204813	0.015362	0.0184334	0.0176142	0.00181388	1.15114	1.565	0.058422	0.0323591
Entorhinal area lateral part	11.3941	8.81194	9.39434	9.71643	10.8786	10.0391	0.955672	8.67489	9.03233	8.84009	8.49792	8.92177	8.7934	0.188204	1.14166	1.809	0.0584275	0.0324635
Bed nuclei of the stria terminalis posterior division transverse nucleus	0.051543	0.0406206	0.0331123	0.040963	0.0392558	0.0410989	0.00594152	0.0355024	0.0331105	0.0344769	0.030724	0.0331119	0.0333851	0.00160666	1.23106	1.772	0.058486	0.0325678
Field CA3 stratum oriens	3.14583	2.03717	2.24925	2.24648	2.24816	2.38538	0.388891	1.90177	1.99584	1.84503	1.75195	1.90206	1.87933	0.0799971	1.26927	1.803	0.0586284	0.0326722
Entorhinal area lateral part layer 6a	1.78352	1.24627	1.36546	1.35519	1.55453	1.46099	0.189316	1.1866	1.21928	1.22205	1.19277	1.25245	1.21463	0.0235386	1.20283	1.826	0.0593432	0.0327766
Intercalated amygdalar nucleus	0.280244	0.242017	0.207891	0.246119	0.250213	0.245297	0.0230482	0.219159	0.23348	0.215054	0.201754	0.207547	0.215399	0.0108537	1.1388	1.66	0.059578	0.032881
Pons	18.7773	18.7838	17.0918	20.6303	20.5212	19.1609	1.31	18.0745	18.0281	17.6297	16.6248	16.9953	17.4705	0.573102	1.09676	1.672	0.0599592	0.0329854
Periventricular hypothalamic nucleus anterior part	0.0262835	0.0170675	0.0160441	0.0191161	0.0177505	0.0192523	0.00365453	0.0153616	0.0167259	0.015361	0.0109241	0.0139957	0.0144737	0.00197364	1.33016	1.627	0.0599599	0.0330898
Cerebrum	345.505	267.539	278.375	289.939	301.011	296.474	26.9523	266.367	268.939	260.326	253.948	259.149	261.746	5.34153	1.13268	1.787	0.0603578	0.0331942
Secondary motor area	10.4769	9.54413	9.09872	10.7391	10.3516	10.0421	0.617838	9.56552	9.56619	9.46921	8.92259	8.51487	9.20768	0.421007	1.09062	1.578	0.0604833	0.0332985
Dorsal cochlear nucleus	0.63217	0.560154	0.692628	0.689203	0.770097	0.66885	0.0698438	0.549264	0.620224	0.615464	0.546887	0.562561	0.57888	0.0322946	1.15542	1.654	0.0607125	0.0334029
Field CA3	8.99647	5.79372	6.45793	6.41344	6.31268	6.79485	1.12613	5.26358	5.77624	5.15447	5.02235	5.53446	5.35022	0.271574	1.27001	1.764	0.0607549	0.0335073
Parabrachial nucleus medial division medial medial part	0.280585	0.23519	0.271385	0.262163	0.28708	0.26728	0.018121	0.256369	0.242014	0.232805	0.244085	0.245096	0.244074	0.00752924	1.09508	1.673	0.0610737	0.0336117
Lobules IV-V molecular layer	4.64808	3.68214	4.50942	4.72167	5.98907	4.71008	0.739829	3.48743	4.18148	3.82967	3.67766	3.65357	3.76596	0.2344	1.2507	1.72	0.0612898	0.0337161
Primary somatosensory area trunk layer 5	1.9542	1.38008	1.5754	1.52314	1.51459	1.58948	0.19343	1.36719	1.42238	1.28008	1.31499	1.32755	1.34244	0.0487179	1.18403	1.751	0.0614475	0.0338205
Parabrachial nucleus medial division	0.315402	0.264204	0.305521	0.295958	0.324629	0.301143	0.0208106	0.28914	0.275124	0.260796	0.274809	0.272746	0.274523	0.00900774	1.09697	1.66	0.0615244	0.0339248
Nucleus incertus	0.150533	0.125275	0.132108	0.149856	0.148489	0.141252	0.0105016	0.136889	0.122543	0.135518	0.119482	0.120159	0.126918	0.00766175	1.11294	1.559	0.061582	0.0340292
Inferior colliculus	7.77343	4.73998	5.78373	5.90072	7.04147	6.24787	1.05516	5.07856	5.23794	4.81516	4.75539	4.64283	4.90598	0.219158	1.27352	1.761	0.0625381	0.0341336
Lobule III granular layer	1.3565	1.12611	1.38526	1.38353	1.68971	1.38822	0.179239	1.10399	1.31486	1.14422	1.0907	1.14663	1.16008	0.080435	1.19666	1.642	0.0627281	0.034238
Lobule III	2.97174	2.413	2.93573	2.9903	3.61222	2.9846	0.380321	2.36023	2.84613	2.46595	2.36063	2.46462	2.49951	0.179544	1.19407	1.631	0.0628092	0.0343424
Basomedial amygdalar nucleus	1.35514	1.22203	0.993028	1.24528	1.24492	1.21208	0.118936	1.04664	1.15887	1.04967	1.01492	1.03637	1.06129	0.0502841	1.14208	1.651	0.0630652	0.0344468
Uvula (IX) molecular layer	1.08684	1.20189	1.33985	1.28863	1.49718	1.28288	0.137256	1.08658	1.15955	1.03806	1.09514	1.16779	1.10942	0.0484511	1.15635	1.685	0.0630917	0.0345511
Medial vestibular nucleus	1.27526	1.27631	1.36477	1.41698	1.56238	1.37914	0.106378	1.29516	1.23567	1.22854	1.24432	1.21968	1.24467	0.0265135	1.10803	1.735	0.0632976	0.0346555
Gustatory areas layer 1	0.489829	0.441023	0.43046	0.469027	0.502816	0.466631	0.0276308	0.444805	0.450234	0.442056	0.409995	0.386078	0.426633	0.0246846	1.09375	1.527	0.0633061	0.0347599
Dorsal auditory area	3.24277	2.46523	2.62885	2.68103	2.78682	2.76094	0.26234	2.45206	2.46792	2.39666	2.37701	2.44584	2.4279	0.034851	1.13717	1.78	0.0634732	0.0348643
Secondary motor area layer 5	3.46157	3.16465	2.9016	3.47674	3.29169	3.25925	0.212675	3.0696	3.11034	3.09405	2.87781	2.67148	2.96465	0.168802	1.09937	1.534	0.0635515	0.0349687
Basolateral amygdalar nucleus anterior part	0.920947	0.828796	0.688873	0.834963	0.81379	0.817474	0.0744211	0.698784	0.806939	0.706948	0.674221	0.715831	0.720545	0.0453665	1.13452	1.573	0.0637081	0.0350731
Visceral area layer 5	0.5738	0.499053	0.503854	0.524327	0.584059	0.537018	0.0354062	0.506934	0.50246	0.498379	0.480318	0.474148	0.492448	0.0128628	1.09051	1.673	0.0638612	0.0351775
Midbrain motor related	30.9749	19.8263	22.414	22.0446	22.8554	23.623	3.82122	20.1985	19.6246	18.4841	17.9111	17.8275	18.8091	0.945634	1.25593	1.729	0.0639196	0.0352818
Fields of Forel	0.0727063	0.0522265	0.055301	0.0535933	0.0559822	0.0579619	0.00748836	0.053595	0.0546152	0.0457417	0.0378929	0.0457422	0.0475174	0.0061033	1.2198	1.529	0.0639328	0.0353862
Dorsal column nuclei	0.353974	0.313359	0.322248	0.330435	0.375491	0.339101	0.0226592	0.324301	0.334518	0.298686	0.295974	0.274794	0.305655	0.0213326	1.10943	1.52	0.063954	0.0354906
Lobule III molecular layer	1.61524	1.28689	1.55048	1.60677	1.92251	1.59638	0.202346	1.25624	1.53127	1.32173	1.26993	1.31799	1.33943	0.0993261	1.19183	1.612	0.0641447	0.035595
Entorhinal area lateral part layer 2a	1.20256	0.975235	1.05072	1.08108	1.2043	1.10278	0.0891184	1.00704	1.0254	1.01075	0.932303	0.978678	0.990835	0.0329484	1.11298	1.666	0.0643025	0.0356994
Crus 1 granular layer	2.82701	2.53486	2.8934	3.08247	3.60778	2.98911	0.355879	2.34623	2.61231	2.79878	2.38145	2.55815	2.53938	0.164441	1.1771	1.622	0.0643936	0.0358038
Bed nuclei of the stria terminalis anterior division magnocellular nucleus	0.0788505	0.0532505	0.0563251	0.0624686	0.0645161	0.0630822	0.0088701	0.0532537	0.0515431	0.0525688	0.0505239	0.0515453	0.0518869	0.000940815	1.21576	1.775	0.064684	0.0359081
Supraoptic nucleus	0.0655381	0.0559813	0.0573492	0.0593964	0.0611026	0.0598735	0.00332708	0.0542778	0.0566633	0.0587132	0.0501825	0.055983	0.0551639	0.0028676	1.08537	1.516	0.0650661	0.0360125
Lateral dorsal nucleus of thalamus	1.57189	0.964654	1.12479	1.08757	0.973203	1.14442	0.222701	0.854448	0.965665	0.80833	0.766734	0.935325	0.866101	0.0749025	1.32135	1.675	0.0651358	0.0361169
Subiculum ventral part stratum radiatum	0.719895	0.520899	0.549596	0.565631	0.615463	0.594297	0.0698999	0.4984	0.528061	0.484384	0.494656	0.529449	0.50699	0.0183593	1.17221	1.708	0.065395	0.0362213
Entorhinal area lateral part layer 1	2.44061	1.97266	2.08061	2.19425	2.39222	2.21607	0.178617	2.00896	2.07572	2.03072	1.88918	1.96213	1.99334	0.0636397	1.11173	1.661	0.0656277	0.0363257
Ansiform lobule	12.5028	11.1195	13.22	13.8062	15.9706	13.3238	1.59891	10.3613	11.8689	12.2547	10.6189	11.5124	11.3232	0.724237	1.17668	1.612	0.0661588	0.0364301
Parabrachial nucleus lateral division ventral lateral part	0.121519	0.102063	0.124257	0.116062	0.126301	0.11804	0.00869665	0.113676	0.106158	0.103089	0.111289	0.100701	0.106983	0.0048712	1.10336	1.569	0.0663136	0.0365344
Entorhinal area medial part dorsal zone layer 5	0.310623	0.208223	0.241003	0.233489	0.279911	0.25465	0.0362232	0.203456	0.210268	0.213006	0.202437	0.218129	0.209459	0.00589478	1.21575	1.741	0.0663323	0.0366388
Entorhinal area medial part dorsal zone layer 2b	0.0174086	0.0191156	0.0201405	0.0201401	0.0215054	0.019662	0.00135884	0.0194581	0.0180913	0.0167264	0.0174103	0.0177507	0.0178873	0.000905845	1.09921	1.537	0.0664558	0.0367432
Piriform area	16.2849	14.4575	14.0628	15.5369	16.6356	15.3955	1.00046	14.7694	14.3549	14.3632	13.7336	13.5073	14.1457	0.459881	1.08836	1.605	0.0666166	0.0368476
Entorhinal area lateral part layer 2b	1.17764	0.957144	1.01044	1.05309	1.19679	1.07902	0.0936216	0.940473	1.00936	0.974229	0.91933	0.971851	0.963048	0.0308801	1.12042	1.664	0.0668129	0.036952
Midbrain	53.0213	33.4471	37.9925	37.8242	40.2396	40.505	6.63389	34.3319	33.6781	32.0362	30.7066	30.6346	32.2775	1.51045	1.2549	1.71	0.0669191	0.0370564
Gustatory areas layer 4	0.177499	0.160093	0.156345	0.169655	0.185014	0.169721	0.0106397	0.158396	0.167942	0.150879	0.148499	0.154295	0.156002	0.00683717	1.08794	1.534	0.0676669	0.0371608
postcommissural fornix	0.501435	0.322917	0.348533	0.341358	0.36013	0.374874	0.0644232	0.309281	0.311648	0.287763	0.275833	0.292887	0.295482	0.0134473	1.26869	1.706	0.0682387	0.0372651
columns of the fornix	0.501435	0.322917	0.348533	0.341358	0.36013	0.374874	0.0644232	0.309281	0.311648	0.287763	0.275833	0.292887	0.295482	0.0134473	1.26869	1.706	0.0682387	0.0373695
Lateral amygdalar nucleus	0.867697	0.670069	0.653712	0.688861	0.691585	0.714385	0.0778729	0.623	0.669377	0.61444	0.609359	0.577239	0.618683	0.0297022	1.15469	1.624	0.0686524	0.0374739
cranial nerves	10.5315	10.2231	9.87089	11.1894	11.4627	10.6555	0.592385	10.1537	10.2079	9.96724	9.52	9.78302	9.92638	0.252311	1.07345	1.601	0.068948	0.0375783
Ventral group of the dorsal thalamus	6.00425	3.96955	4.21824	4.35266	4.27274	4.56349	0.731672	3.8329	4.00773	3.51323	3.38237	3.59964	3.66717	0.224863	1.24442	1.656	0.0689518	0.0376827
Anterior olfactory nucleus medial part	0.794991	0.659828	0.747588	0.742113	0.714798	0.731864	0.0443117	0.689225	0.666647	0.64721	0.6691	0.712417	0.67692	0.0221849	1.08117	1.568	0.069292	0.0377871
Bed nuclei of the stria terminalis anterior division rhomboid nucleus	0.0672448	0.0529092	0.0505219	0.0587137	0.0467656	0.055231	0.00715108	0.0464263	0.049495	0.0457417	0.0450619	0.0457422	0.0464934	0.0015616	1.18793	1.688	0.0697918	0.0378914
Vermal regions	22.7066	20.1953	24.2744	24.6389	31.1367	24.5904	3.62829	18.9112	22.069	20.0871	19.5705	20.2034	20.1682	1.05433	1.21926	1.655	0.0699627	0.0379958
Parataenial nucleus	0.239624	0.147804	0.155662	0.140298	0.16112	0.168902	0.0360574	0.123917	0.128346	0.112989	0.126651	0.132448	0.12487	0.00655354	1.35262	1.699	0.0701583	0.0381002
Primary somatosensory area trunk layer 2/3	1.52205	1.17902	1.20979	1.27224	1.29817	1.29626	0.120652	1.17192	1.19232	1.12238	1.14088	1.11932	1.14936	0.0284845	1.1278	1.676	0.0703739	0.0382046
Subiculum ventral part	5.77657	3.91767	4.34283	4.31955	4.76498	4.62432	0.635443	3.71171	3.9992	3.77915	3.76198	4.00142	3.85069	0.124157	1.20091	1.69	0.0706379	0.038309
lateral forebrain bundle system	17.7636	12.0401	13.332	13.2758	13.7054	14.0234	1.95246	12.0906	11.6689	11.8976	11.2037	11.4246	11.6571	0.317985	1.20299	1.692	0.0717404	0.0384134
Bed nuclei of the stria terminalis posterior division dorsal nucleus	0.00580285	0.00477889	0.00546183	0.00614445	0.00546168	0.00552994	0.000452875	0.00375507	0.00409614	0.00512034	0.00580342	0.00409632	0.00457426	0.000766439	1.20893	1.518	0.0719769	0.0385177
Infralimbic area layer 5	0.49256	0.405523	0.48303	0.47244	0.461512	0.463013	0.0305611	0.427053	0.41883	0.436935	0.418529	0.42943	0.426156	0.0069218	1.08649	1.663	0.0722739	0.0386221
Lateral septal nucleus ventral part	0.174427	0.10616	0.129036	0.117427	0.129715	0.131353	0.0232036	0.103776	0.110254	0.0959209	0.100706	0.106163	0.103364	0.00485681	1.27078	1.67	0.0723432	0.0387265
Medial amygdalar nucleus anteroventral part	0.578237	0.489495	0.429095	0.48746	0.460829	0.489023	0.0496953	0.429784	0.435897	0.454344	0.422626	0.40417	0.429364	0.0164137	1.13895	1.612	0.0730438	0.0388309
Crus 2 molecular layer	3.20966	2.87553	3.55326	3.60577	4.1362	3.47608	0.421942	2.71047	3.17144	3.15788	2.75116	3.03435	2.96506	0.197554	1.17235	1.551	0.0733009	0.0389353
Supramammillary nucleus medial part	0.106158	0.0863614	0.0710037	0.081926	0.0914832	0.0873865	0.0115621	0.0751013	0.0754372	0.0764637	0.0727135	0.0679306	0.0735292	0.00305724	1.18846	1.639	0.0733563	0.0390397
Substantia nigra reticular part	2.07674	1.40738	1.45728	1.50129	1.62724	1.61399	0.242592	1.45765	1.37664	1.36269	1.25217	1.16301	1.32243	0.103145	1.22047	1.564	0.0739138	0.0391441
Supplemental somatosensory area	6.99517	5.93777	6.09642	6.28543	6.50623	6.3642	0.36825	6.13544	6.24047	5.6805	5.56548	5.84817	5.89401	0.258433	1.07977	1.478	0.0739927	0.0392484
Dorsal auditory area layer 5	0.974196	0.73356	0.762266	0.780345	0.809012	0.811876	0.0847878	0.715169	0.716483	0.705582	0.699824	0.7131	0.710032	0.00634697	1.14344	1.694	0.0739979	0.0393528
cerebrum related	10.1188	6.15385	6.9727	6.80225	6.89025	7.38757	1.39598	5.80977	5.96022	5.73716	5.32925	5.73655	5.71459	0.209225	1.29276	1.676	0.0740084	0.0394572
principal mammillary tract	0.0266249	0.0238945	0.0184337	0.0211642	0.021164	0.0222562	0.00278446	0.0191167	0.018774	0.0191159	0.0187758	0.0187748	0.0189114	0.000167286	1.17687	1.696	0.0740444	0.0395616
Bed nuclei of the stria terminalis anterior division anterolateral area	0.3707	0.274104	0.288111	0.302785	0.303123	0.307765	0.033246	0.269682	0.285023	0.257724	0.266275	0.262506	0.268242	0.00928539	1.14734	1.619	0.0749806	0.039666
Anterolateral visual area layer 5	0.852337	0.618525	0.639375	0.666673	0.703874	0.696157	0.0831526	0.579646	0.616469	0.595666	0.603214	0.590211	0.597041	0.012383	1.16601	1.667	0.0750802	0.0397704
Edinger-Westphal nucleus	0.0423267	0.0252599	0.0351605	0.0324291	0.0331114	0.0336575	0.0054725	0.0273096	0.0293557	0.0256017	0.0256033	0.0279915	0.0271723	0.00144122	1.23867	1.621	0.0756566	0.0398747
internal medullary lamina of the thalamus	0.0286729	0.0139953	0.0170682	0.0157025	0.0201399	0.0191158	0.00518555	0.015703	0.0126298	0.0126302	0.0133137	0.0105821	0.0129718	0.00164442	1.47365	1.597	0.075717	0.0399791
Field CA3 stratum lacunosum-moleculare	0.123225	0.0716834	0.085341	0.0826088	0.0774876	0.0880692	0.0181861	0.0566674	0.0750959	0.0617854	0.061448	0.0768059	0.0663605	0.00805525	1.32713	1.544	0.0757807	0.0400835
Retrohippocampal region	30.7101	20.8783	23.1319	23.3363	26.0686	24.825	3.37164	20.3053	21.333	20.9067	20.1853	21.3821	20.8225	0.50086	1.19222	1.661	0.0758956	0.0401879
dorsal fornix	0.216412	0.132444	0.143714	0.128692	0.132787	0.15081	0.0331824	0.109921	0.118447	0.11845	0.110265	0.10036	0.111489	0.00670356	1.35269	1.643	0.0759215	0.0402923
Piriform area polymorph layer	5.28845	4.7393	4.41043	5.02787	5.3364	4.96049	0.347823	4.68291	4.69759	4.52433	4.45805	4.37964	4.5485	0.124556	1.09058	1.577	0.0760427	0.0403967
Field CA3 stratum radiatum	2.44402	1.5627	1.72628	1.73274	1.69244	1.83164	0.312284	1.39381	1.60364	1.3842	1.38941	1.54431	1.46307	0.0925238	1.25191	1.6	0.0764867	0.040501
Inferior colliculus central nucleus	1.99652	1.17663	1.45592	1.50266	1.81157	1.58866	0.286644	1.30062	1.35616	1.22274	1.21565	1.15618	1.25027	0.0700818	1.27065	1.622	0.076497	0.0406054
Bed nuclei of the stria terminalis posterior division	0.837317	0.572784	0.559496	0.609325	0.63219	0.642222	0.100906	0.52844	0.560147	0.518519	0.496022	0.512381	0.523102	0.0213078	1.22772	1.633	0.0766455	0.0407098
Locus ceruleus	0.0611006	0.0501784	0.059056	0.0546174	0.063492	0.0576889	0.00475453	0.0529123	0.0529085	0.056665	0.0484756	0.047449	0.0516821	0.00334807	1.11623	1.461	0.0766561	0.0408142
Subiculum ventral part pyramidal layer	3.98076	2.60654	2.95894	2.91691	3.22103	3.13684	0.464868	2.47937	2.68877	2.56085	2.51868	2.69128	2.58779	0.0873664	1.21217	1.642	0.0766774	0.0409186
Supratrigeminal nucleus	0.161456	0.146098	0.163513	0.173069	0.183649	0.165557	0.0125173	0.156347	0.152581	0.143711	0.150889	0.15054	0.150814	0.00410555	1.09776	1.583	0.0770158	0.041023
Medial pretectal area	0.224263	0.120155	0.139277	0.140298	0.137907	0.15238	0.0366954	0.112311	0.113668	0.101724	0.111631	0.106163	0.109099	0.00448574	1.39671	1.656	0.0773539	0.0411273
Pallidum caudal region	2.12009	1.48658	1.52487	1.60302	1.62861	1.67263	0.229544	1.40952	1.47563	1.39102	1.35527	1.38182	1.40265	0.0404663	1.19248	1.638	0.0775975	0.0412317
Cortical amygdalar area posterior part medial zone layer 3	0.573458	0.548549	0.461866	0.573141	0.579621	0.547327	0.0440391	0.504544	0.516455	0.499403	0.491925	0.464932	0.495452	0.017224	1.1047	1.551	0.0776501	0.0413361
Prelimbic area layer 6a	0.278196	0.244065	0.232469	0.245095	0.269329	0.253831	0.0170988	0.248858	0.218802	0.249872	0.222237	0.208571	0.229668	0.0167025	1.10521	1.43	0.0778673	0.0414405
Primary somatosensory area trunk	6.36778	4.53278	5.0556	4.98383	5.0623	5.20046	0.615699	4.58186	4.64536	4.34307	4.39387	4.42368	4.47757	0.115786	1.16145	1.632	0.0778889	0.0415449
Cerebellar cortex	55.9613	49.3424	60.2334	61.1018	73.8092	60.0896	8.02267	47.0049	54.3401	52.3121	48.9085	50.8616	50.6854	2.5588	1.18554	1.579	0.0779955	0.0416493
Bed nuclei of the stria terminalis	2.10234	1.47326	1.5102	1.59005	1.61495	1.65816	0.227983	1.39688	1.46266	1.3801	1.34503	1.37022	1.39098	0.0395837	1.19208	1.633	0.0783516	0.0417537
Infralimbic area layer 2	0.082264	0.0740728	0.0757828	0.0798779	0.0771462	0.0778288	0.00291988	0.072029	0.0764613	0.061444	0.0751031	0.0723682	0.0714811	0.0052868	1.0888	1.486	0.0785258	0.041858
Medial preoptic nucleus lateral part	0.10923	0.0860201	0.0672487	0.0935322	0.0737327	0.0859528	0.014822	0.0686153	0.0785093	0.0658816	0.0679342	0.0621274	0.0686136	0.00543914	1.25271	1.553	0.0788274	0.0419624
Primary motor area Layer 6a	2.71778	2.00884	2.25881	2.2417	2.32463	2.31035	0.229992	2.11991	1.97058	2.11333	2.04895	1.95667	2.04189	0.068683	1.13148	1.582	0.0788293	0.0420668
Piriform area molecular layer	6.57156	5.80704	5.79602	6.28236	6.81481	6.25436	0.406369	6.08696	5.78375	5.957	5.54227	5.4382	5.76164	0.243814	1.08552	1.47	0.0788906	0.0421712
Orbital area medial part layer 5	0.251229	0.248844	0.241003	0.24373	0.266598	0.250281	0.0089243	0.239641	0.240648	0.224953	0.233844	0.250558	0.237929	0.00842464	1.05191	1.423	0.0790374	0.0422756
Postpiriform transition area layers 3	0.520209	0.496663	0.43285	0.504869	0.536269	0.498172	0.0353585	0.468701	0.462522	0.447517	0.469394	0.436258	0.456878	0.0129701	1.09038	1.551	0.0791965	0.04238
Cerebral cortex	282.467	216.838	225.608	235.739	245.457	241.222	22.7487	217.571	220.706	213.384	208.329	213.419	214.682	4.20172	1.12362	1.622	0.0792217	0.0424843
Entorhinal area lateral part layer 3	1.70058	1.29337	1.40028	1.45555	1.68288	1.50653	0.160049	1.26955	1.35719	1.31285	1.30645	1.3552	1.32025	0.0328661	1.1411	1.612	0.0796078	0.0425887
Presubiculum layer 2	1.06807	0.571078	0.691262	0.64824	0.727769	0.741283	0.171522	0.525027	0.557758	0.521591	0.516846	0.585773	0.541399	0.0264572	1.3692	1.629	0.0796268	0.0426931
Isocortex	154.819	118.746	123.716	129.641	133.674	132.119	12.4364	120.328	121.481	116.896	114.623	114.944	117.654	2.78931	1.12294	1.605	0.0796721	0.0427975
Anterior cingulate area dorsal part layer 6b	0.0679275	0.0549573	0.0512046	0.0587137	0.0542755	0.0574157	0.00577348	0.0542778	0.039596	0.0546169	0.0505239	0.0481317	0.0494293	0.00547712	1.16157	1.419	0.0797324	0.0429019
Pretectal region	2.67511	1.59171	1.86419	1.77711	1.80611	1.94285	0.377323	1.56893	1.59579	1.41526	1.42662	1.51291	1.5039	0.0729157	1.29187	1.615	0.0797748	0.0430063
Paraventricular hypothalamic nucleus parvicellular division	0.336907	0.211637	0.207208	0.233489	0.230073	0.243863	0.0476173	0.202774	0.192519	0.18638	0.179565	0.181603	0.188568	0.00838759	1.29323	1.617	0.0802416	0.0431106
Uvula (IX)	2.30339	2.62839	2.91491	2.82474	3.26677	2.78764	0.318432	2.3179	2.56384	2.24578	2.37599	2.57761	2.41622	0.132796	1.15372	1.522	0.0803266	0.043215
Primary auditory area layer 4	0.38333	0.306873	0.311665	0.332825	0.352961	0.337531	0.0281662	0.308598	0.311307	0.295614	0.300071	0.30893	0.304904	0.00600855	1.10701	1.602	0.0805803	0.0433194
Supplemental somatosensory area layer 6b	0.398349	0.335547	0.341706	0.339652	0.376515	0.358353	0.0248053	0.345125	0.348172	0.319168	0.301778	0.32395	0.327638	0.0172135	1.09375	1.439	0.0806385	0.0434238
Bed nuclei of the stria terminalis posterior division principal nucleus	0.442723	0.304142	0.292208	0.317463	0.32736	0.336779	0.0542914	0.274803	0.294581	0.267964	0.261154	0.27104	0.273908	0.0112639	1.22953	1.604	0.0806666	0.0435282
Cerebellum	64.8185	57.7294	70.7767	71.474	86.5676	70.2733	9.53211	55.0752	63.5311	61.0795	57.0186	59.5048	59.2418	2.97144	1.18621	1.562	0.0807357	0.0436326
Parabrachial nucleus lateral division	0.661525	0.54377	0.62811	0.614445	0.660181	0.621606	0.0429735	0.591935	0.57858	0.560847	0.59229	0.528766	0.570484	0.0238095	1.08961	1.472	0.0807785	0.043737
Crus 2	6.09368	5.4691	6.76823	6.91285	7.94777	6.63833	0.83314	5.10791	6.0616	6.028	5.28896	5.82803	5.6629	0.391757	1.17225	1.498	0.0809342	0.0438413
Supplemental somatosensory area layer 6a	1.60364	1.31181	1.3658	1.347	1.45076	1.4158	0.104453	1.34909	1.3606	1.23946	1.20916	1.29785	1.29123	0.0593627	1.09647	1.466	0.0809649	0.0439457
medial forebrain bundle system	11.9047	7.16015	8.08999	7.88879	8.02321	8.61337	1.67881	6.80862	6.94808	6.66224	6.24687	6.67836	6.66883	0.23482	1.29159	1.622	0.0809763	0.0440501
amygdalar capsule	0.215388	0.182963	0.171365	0.188771	0.198669	0.191431	0.0148846	0.173416	0.186716	0.170336	0.170006	0.169997	0.174094	0.00644021	1.09958	1.512	0.0810157	0.0441545
Supplemental somatosensory area layer 4	0.881692	0.735949	0.792306	0.798779	0.820959	0.805937	0.0471165	0.771837	0.793627	0.722309	0.715186	0.741433	0.748878	0.0297525	1.07619	1.448	0.0812536	0.0442589
Bed nuclei of the stria terminalis anterior division	1.26502	0.90048	0.950699	0.980723	0.982761	1.01594	0.128039	0.868444	0.902516	0.861582	0.849006	0.857837	0.867877	0.0184213	1.1706	1.619	0.0813015	0.0443633
Hypothalamic lateral zone	10.4677	8.01045	7.70903	8.49983	8.56869	8.65113	0.96203	7.99351	7.68163	7.81295	7.14469	7.06102	7.53876	0.370381	1.14755	1.526	0.0816818	0.0444676
Cortical plate	272.05	207.827	217.311	226.391	235.84	231.884	22.137	209.23	211.94	205.24	200.197	205.279	206.377	3.99441	1.12359	1.604	0.0818625	0.044572
Copula pyramidis	2.94853	2.41232	3.39623	2.94353	3.62656	3.06543	0.419374	2.44591	2.72564	2.57792	2.57262	2.59672	2.58376	0.0888342	1.18642	1.589	0.0824065	0.0446764
Paramedian lobule molecular layer	3.01919	2.50107	3.40852	3.22311	3.83512	3.1974	0.440128	2.46162	2.90723	2.80048	2.59652	2.70015	2.6932	0.155143	1.18721	1.528	0.0833309	0.0447808
Subfornical organ	0.0351585	0.0225291	0.0249196	0.0174093	0.0218467	0.0243726	0.0059144	0.0163857	0.0201394	0.015361	0.018093	0.0180921	0.0176142	0.00163829	1.38369	1.557	0.0834256	0.0448852
Periaqueductal gray	7.41775	4.50923	5.2058	5.05449	5.30807	5.49907	0.998124	4.6416	4.47298	4.28538	4.17573	4.21852	4.35884	0.174125	1.26159	1.592	0.0837345	0.0449896
fornix system	7.77821	4.51127	5.16245	5.00466	5.07322	5.50596	1.15837	4.26234	4.38901	4.15396	3.8603	4.25198	4.18352	0.178029	1.31611	1.596	0.0839744	0.0450939
Posterodorsal preoptic nucleus	0.00375479	0.00341349	0.00238955	0.00375494	0.00409626	0.00348181	0.000587259	0.00307233	0.00238941	0.00341356	0.00170689	0.00273088	0.00266261	0.00058728	1.30767	1.395	0.0839902	0.0451983
Supplemental somatosensory area layer 2/3	1.59852	1.43606	1.41564	1.51051	1.54907	1.50196	0.0684253	1.47369	1.49611	1.35689	1.34298	1.38353	1.41064	0.0624237	1.06473	1.394	0.0844078	0.0453027
Basolateral amygdalar nucleus	1.76338	1.64291	1.3518	1.65866	1.62246	1.60784	0.13695	1.42829	1.58794	1.3842	1.40852	1.43337	1.44846	0.071851	1.11003	1.457	0.0845592	0.0454071
Prelimbic area layer 5	0.4673	0.438293	0.414757	0.476878	0.45844	0.451134	0.0222064	0.433198	0.443748	0.398362	0.42877	0.416459	0.424108	0.0155658	1.06372	1.409	0.0855355	0.0455115
Supplemental somatosensory area layer 1	0.682688	0.650953	0.608994	0.671793	0.681003	0.659086	0.0274747	0.648944	0.658454	0.605565	0.587852	0.603524	0.620868	0.0276623	1.06156	1.386	0.0855892	0.0456159
Dentate nucleus	0.318133	0.303801	0.389838	0.373105	0.445468	0.366069	0.051174	0.280264	0.335542	0.33248	0.281637	0.307565	0.307498	0.0237532	1.19048	1.468	0.0860721	0.0457203
Area postrema	0.0471055	0.0389138	0.0409637	0.0327704	0.0440348	0.0407577	0.0048636	0.0385748	0.0378893	0.0303807	0.0314067	0.0361841	0.0348871	0.00336794	1.16827	1.403	0.0868911	0.0458246
Inferior colliculus dorsal nucleus	1.66201	0.933932	1.17395	1.15618	1.34562	1.25434	0.242191	0.984851	1.06739	0.993345	0.91933	0.944883	0.981959	0.0504632	1.27738	1.557	0.0870382	0.045929
Interbrain	55.2513	36.2069	37.3483	39.0354	39.4804	41.4645	6.99284	35.2205	35.22	33.2484	31.6129	32.7603	33.6124	1.41609	1.23361	1.556	0.0874094	0.0460334
Hemispheric regions	33.2548	29.1471	35.959	36.4629	42.6725	35.4992	4.42677	28.0937	32.2711	32.225	29.338	30.6582	30.5172	1.62951	1.16325	1.494	0.0876566	0.0461378
Paraventricular hypothalamic nucleus	0.4062	0.246454	0.251585	0.278207	0.279911	0.292472	0.0584544	0.242031	0.231432	0.226319	0.215068	0.220177	0.227005	0.00932702	1.28839	1.564	0.0881544	0.0462422
Anterolateral visual area	2.72222	1.9334	2.0458	2.08638	2.21881	2.20132	0.275979	1.89085	1.92655	1.86722	1.89635	1.88089	1.89237	0.0197536	1.16326	1.579	0.0886074	0.0463466
Paramedian lobule	5.27889	4.33548	6.02917	5.61774	6.76395	5.60505	0.805144	4.31491	5.06317	4.90255	4.51711	4.72954	4.70546	0.266602	1.19118	1.5	0.0888739	0.0464509
Ventral auditory area layer 1	0.347488	0.297657	0.299718	0.308929	0.341014	0.318961	0.0210948	0.301088	0.316427	0.287421	0.280271	0.286401	0.294322	0.0129784	1.08372	1.407	0.0890974	0.0465553
Ventral auditory area layer 2/3	0.62978	0.534895	0.533211	0.56802	0.599419	0.573065	0.0373683	0.544143	0.570729	0.512034	0.496022	0.518184	0.528222	0.0263059	1.08489	1.388	0.0894304	0.0466597
Dentate gyrus polymorph layer	1.18446	0.730488	0.82576	0.798779	0.825055	0.872909	0.159599	0.655771	0.75881	0.660865	0.655445	0.745529	0.695284	0.0466759	1.25547	1.511	0.0894864	0.0467641
Anterior cingulate area dorsal part	2.98506	2.62703	2.51893	2.84932	2.83632	2.76333	0.167449	2.66951	2.58671	2.68545	2.51288	2.3407	2.55905	0.125499	1.07983	1.381	0.0895212	0.0468685
Presubiculum layer 1	0.692246	0.386749	0.469717	0.429088	0.466632	0.488886	0.106043	0.369362	0.386402	0.365251	0.35196	0.381299	0.370855	0.0121773	1.31827	1.564	0.0897281	0.0469729
Crus 2 granular layer	2.88402	2.59357	3.21497	3.30708	3.81157	3.16224	0.411383	2.39744	2.89017	2.87012	2.5378	2.79369	2.69784	0.195811	1.17214	1.442	0.0898888	0.0470772
Hippocampal formation	65.7036	41.7894	46.9959	46.4411	49.2647	50.039	8.20051	39.6798	43.0064	40.3895	39.1564	42.4965	40.9457	1.53396	1.22208	1.541	0.0902997	0.0471816
Dorsal auditory area layer 6b	0.221532	0.147463	0.166586	0.161463	0.170336	0.173476	0.0252498	0.14713	0.145754	0.152586	0.136892	0.145419	0.145556	0.00504012	1.19181	1.533	0.0909132	0.047286
Primary auditory area layer 2/3	0.790553	0.630472	0.655419	0.693299	0.727428	0.699434	0.0562441	0.671815	0.645825	0.601127	0.618918	0.645852	0.636708	0.0244202	1.09852	1.447	0.0914113	0.0473904
Anterior cingulate area dorsal part layer 6a	0.430094	0.351931	0.337268	0.37686	0.375491	0.374329	0.0315995	0.354	0.327008	0.359106	0.34206	0.307906	0.338016	0.0186784	1.10743	1.399	0.0915996	0.0474948
Hypothalamus	21.6013	16.1629	14.8459	17.0949	17.1753	17.3761	2.27355	15.9331	15.21	15.4638	14.0419	13.636	14.8569	0.872477	1.16956	1.463	0.0917012	0.0475992
cerebellum related fiber tracts	9.44397	9.25125	10.9196	11.1105	12.9889	10.7428	1.35079	8.97905	9.89081	9.37021	8.75497	9.29829	9.25867	0.386138	1.1603	1.494	0.0924849	0.0477035
Bed nuclei of the stria terminalis anterior division ventral nucleus	0.0959177	0.064515	0.0652006	0.0744161	0.0747568	0.0749612	0.0113482	0.0624706	0.0624661	0.0737328	0.0549618	0.0563243	0.0619911	0.00663094	1.20923	1.396	0.0925485	0.0478079
Thalamus	33.6501	20.044	22.5024	21.9405	22.3052	24.0884	4.85986	19.2874	20.01	17.7846	17.5711	19.1243	18.7555	0.931468	1.28434	1.524	0.0926963	0.0479123
Nucleus of the solitary tract gelatinous part	0.0375479	0.0290147	0.0296987	0.0262846	0.0348182	0.0314728	0.00410379	0.0273096	0.028673	0.0204813	0.0293585	0.026626	0.0264897	0.00315556	1.18812	1.361	0.0927935	0.0480167
Anterolateral visual area layer 2/3	0.617833	0.463553	0.485761	0.507941	0.521591	0.519336	0.0530578	0.469383	0.460816	0.446152	0.471101	0.458446	0.46118	0.00893507	1.1261	1.529	0.0930281	0.0481211
Superior colliculus motor related intermediate gray layer sublayer b	1.64357	0.954754	1.12753	1.06401	1.12613	1.1832	0.238618	0.973928	0.960886	0.87626	0.893044	0.908017	0.922427	0.0382983	1.2827	1.526	0.0937432	0.0482255
Declive (VI) molecular layer	2.0566	1.8054	2.12806	2.28471	3.15719	2.28639	0.462066	1.6239	1.93884	1.89043	1.68504	1.77097	1.78184	0.119059	1.28317	1.495	0.0938495	0.0483299
Midbrain sensory related	13.0045	7.46087	8.78637	8.92004	10.186	9.67157	1.87664	7.89998	7.94002	7.76106	7.28363	7.23819	7.62458	0.303156	1.26847	1.523	0.094183	0.0484342
Nodulus (X) molecular layer	0.74652	0.757796	0.953771	0.844862	1.01519	0.863628	0.106173	0.75033	0.765295	0.716506	0.745228	0.761915	0.747855	0.017307	1.15481	1.522	0.0942556	0.0485386
Auditory areas	10.212	7.77184	8.18489	8.4534	8.91893	8.70821	0.839207	7.86482	8.04277	7.67231	7.52294	7.86595	7.79376	0.179086	1.11733	1.507	0.0943123	0.048643
Ventral auditory area layer 4	0.329739	0.264204	0.270702	0.285717	0.308244	0.291721	0.0243037	0.273778	0.278537	0.255675	0.253302	0.263871	0.265033	0.0098527	1.1007	1.439	0.0944443	0.0487474
Lateral group of the dorsal thalamus	3.59435	2.24881	2.63943	2.43081	2.47619	2.67792	0.474811	2.19296	2.38259	1.97577	1.97487	2.27345	2.15993	0.162307	1.23982	1.46	0.0947705	0.0488518
Parabrachial nucleus medial division external medial part	0.0348171	0.0290147	0.0341364	0.0337945	0.0375491	0.0338624	0.00275981	0.0327715	0.0331105	0.0279912	0.030724	0.0276501	0.0304494	0.00229902	1.11208	1.344	0.0951203	0.0489562
Paraventricular hypothalamic nucleus parvicellular division anterior parvicellular part	0.144389	0.0795344	0.0832929	0.0966044	0.0918245	0.099129	0.0234218	0.0774909	0.0761199	0.0699779	0.0713479	0.0737337	0.0737341	0.00281455	1.34441	1.522	0.0957277	0.0490605
Primary somatosensory area lower limb layer 6a	1.06943	0.709324	0.818591	0.803558	0.828127	0.845806	0.119561	0.749306	0.722286	0.719919	0.699483	0.690912	0.716381	0.0203258	1.18067	1.509	0.0959532	0.0491649
Medial preoptic nucleus	0.270686	0.201396	0.178192	0.233148	0.189793	0.214643	0.033481	0.177171	0.199687	0.174774	0.173761	0.166242	0.178327	0.011288	1.20365	1.454	0.0961306	0.0492693
Primary auditory area layer 5	1.13121	0.830162	0.88345	0.922009	0.980372	0.949442	0.103279	0.827139	0.871112	0.832567	0.808041	0.849985	0.837769	0.0213768	1.1333	1.497	0.096162	0.0493737
Superior colliculus motor related intermediate white layer	1.14521	0.654367	0.757146	0.732897	0.792968	0.816517	0.170531	0.690932	0.6547	0.616488	0.610725	0.587821	0.632133	0.0364231	1.29169	1.495	0.0961654	0.0494781
Paramedian lobule granular layer	2.2597	1.83441	2.62065	2.39463	2.92883	2.40764	0.365419	1.8533	2.15593	2.10207	1.92059	2.02938	2.01225	0.111959	1.19649	1.463	0.0963687	0.0495825
Nucleus of the posterior commissure	0.484367	0.268642	0.301425	0.283669	0.301075	0.327836	0.0792092	0.259782	0.247134	0.227343	0.240671	0.236221	0.24223	0.0108839	1.35341	1.514	0.0964327	0.0496868
Bed nuclei of the stria terminalis posterior division interfascicular nucleus	0.286729	0.193545	0.193895	0.215739	0.229391	0.22386	0.0342519	0.193898	0.200369	0.187746	0.172737	0.179555	0.186861	0.00985535	1.198	1.468	0.0966273	0.0497912
Parasubthalamic nucleus	0.0948937	0.0679285	0.0662246	0.0703198	0.0727086	0.0744151	0.0104711	0.0679326	0.068269	0.0658816	0.0600825	0.0491558	0.0622643	0.00718142	1.19515	1.353	0.0967124	0.0498956
mammillotegmental tract	0.140975	0.0931884	0.105482	0.101042	0.109234	0.109984	0.0163911	0.102752	0.0938699	0.0935315	0.0853444	0.0853399	0.0921676	0.00648022	1.19331	1.43	0.0967606	0.05
Posterior auditory area layer 5	0.0815813	0.0535919	0.0658833	0.0648581	0.0696364	0.0671102	0.00900129	0.0570087	0.0566633	0.0559823	0.0563273	0.0611034	0.057417	0.00187455	1.16882	1.491	0.0971437	0.0501044
Presubiculum	2.42696	1.27835	1.55696	1.4518	1.60983	1.66478	0.397554	1.20196	1.29131	1.20157	1.18458	1.31287	1.23846	0.0527738	1.34424	1.503	0.0983034	0.0502088
Anterior hypothalamic nucleus central part	0.594622	0.411326	0.357408	0.431477	0.449223	0.448811	0.0791466	0.382334	0.382306	0.386073	0.345474	0.323268	0.363891	0.0251427	1.23337	1.446	0.0985918	0.0503132
Uvula (IX) granular layer	1.21655	1.4265	1.57505	1.53611	1.76958	1.50476	0.181794	1.23132	1.40429	1.20772	1.28085	1.40982	1.3068	0.0852117	1.15149	1.394	0.0988149	0.0504175
Declive (VI)	3.9473	3.4746	4.12846	4.42401	6.1263	4.42013	0.90705	3.13377	3.78278	3.65319	3.27313	3.40813	3.4502	0.238774	1.28112	1.462	0.0989778	0.0505219
Anteroventral nucleus of thalamus	0.649578	0.375484	0.421926	0.396659	0.39051	0.446831	0.102476	0.346149	0.377869	0.314047	0.292902	0.357062	0.337606	0.0304173	1.32353	1.445	0.100032	0.0506263
Ventrolateral preoptic nucleus	0.0273075	0.0218464	0.0238955	0.0256019	0.0273084	0.0251919	0.00209747	0.0252614	0.0235528	0.0218468	0.0215068	0.021847	0.0228029	0.00142226	1.10477	1.333	0.101142	0.0507307
dorsal roots	0.988192	1.05204	0.921342	1.09337	1.10975	1.03294	0.0698174	1.01728	1.00355	0.96945	0.870172	0.848279	0.941747	0.0695017	1.09683	1.309	0.101271	0.0508351
cervicothalamic tract	0.988192	1.05204	0.921342	1.09337	1.10975	1.03294	0.0698174	1.01728	1.00355	0.96945	0.870172	0.848279	0.941747	0.0695017	1.09683	1.309	0.101271	0.0509395
Primary somatosensory area mouth layer 6b	0.12186	0.090799	0.116064	0.0979699	0.12084	0.109506	0.0127052	0.103776	0.0785093	0.0986518	0.102413	0.0904603	0.0947622	0.00935506	1.15559	1.322	0.101815	0.0510438
Lateral posterior nucleus of the thalamus	1.56302	0.955437	1.10261	1.03773	1.03635	1.13903	0.217072	0.891999	1.01379	0.840759	0.819989	0.977313	0.908771	0.0755208	1.25337	1.417	0.101985	0.0511482
Dentate gyrus	10.5923	6.28493	7.22156	6.90705	6.89503	7.58016	1.53632	5.65991	6.51627	5.68733	5.58904	6.33495	5.9575	0.387819	1.27237	1.448	0.102019	0.0512526
Dentate gyrus molecular layer	6.98356	4.11838	4.73745	4.537	4.50691	4.97666	1.02328	3.72161	4.2395	3.72214	3.66469	4.13352	3.89629	0.240231	1.27728	1.454	0.10205	0.051357
Superior colliculus motor related deep gray layer	2.83486	1.59069	1.89764	1.80988	1.92695	2.01201	0.427965	1.7106	1.60364	1.5402	1.50923	1.43781	1.5603	0.0921804	1.2895	1.459	0.102081	0.0514614
Anterior group of the dorsal thalamus	3.59401	2.02318	2.32981	2.23863	2.16317	2.46976	0.571032	1.88914	2.04431	1.7532	1.67685	1.97579	1.86786	0.136286	1.32224	1.45	0.102476	0.0515658
Trochlear nucleus	0.0160432	0.0139953	0.0116064	0.0116062	0.0119474	0.0130397	0.00174565	0.0116066	0.0122884	0.0122888	0.00989995	0.00853399	0.0109235	0.00147994	1.19372	1.308	0.102574	0.0516701
arbor vitae	5.97421	5.7077	7.26559	7.04257	8.68783	6.93558	1.06044	5.48513	6.3084	5.88702	5.50233	5.90757	5.81809	0.304542	1.19207	1.432	0.102839	0.0517745
brachium of the superior colliculus	0.65777	0.368999	0.443432	0.416116	0.431131	0.46349	0.100366	0.365948	0.395619	0.331115	0.331478	0.365596	0.357951	0.0243404	1.29484	1.445	0.103098	0.0518789
Superior colliculus motor related deep white layer	0.139951	0.0730488	0.0901201	0.09046	0.0867042	0.0960568	0.0228478	0.078515	0.0733892	0.0682711	0.0713479	0.0689546	0.0720956	0.00368601	1.33235	1.464	0.103696	0.0519833
Supplemental somatosensory area layer 5	1.83029	1.46746	1.57198	1.6177	1.62792	1.62307	0.118166	1.54675	1.5835	1.43711	1.40852	1.49789	1.49475	0.0653411	1.08585	1.344	0.104231	0.0520877
Declive (VI) granular layer	1.89071	1.6692	2.00039	2.13929	2.96911	2.13374	0.445087	1.50988	1.84395	1.76276	1.58809	1.63716	1.66837	0.120229	1.27894	1.428	0.104712	0.0521921
Ectorhinal area/Layer 6b	0.190811	0.122544	0.137228	0.134495	0.154634	0.147943	0.0237622	0.117431	0.131418	0.122205	0.114362	0.130058	0.123095	0.00673642	1.20186	1.423	0.104798	0.0522965
Primary motor area Layer 1	1.96785	1.73474	1.72082	1.92355	1.93446	1.85628	0.106027	1.82155	1.81664	1.70507	1.68436	1.67164	1.73985	0.0655939	1.06692	1.321	0.106098	0.0524008
cuneate fascicle	0.0341344	0.0327695	0.0375501	0.0344772	0.042328	0.0362519	0.00341657	0.0361852	0.0327691	0.0314047	0.0290171	0.0327705	0.0324293	0.00232514	1.11787	1.308	0.10648	0.0525052
Anterolateral visual area layer 6a	0.536593	0.334864	0.375159	0.359792	0.404506	0.402183	0.0708952	0.331129	0.335883	0.335211	0.314067	0.327022	0.328663	0.00796007	1.22369	1.457	0.1066	0.0526096
Periventricular zone	0.968394	0.705569	0.623331	0.766691	0.747226	0.762242	0.114238	0.683763	0.652993	0.683735	0.600825	0.596014	0.643466	0.038487	1.18459	1.393	0.107051	0.052714
corpus callosum anterior forceps	4.40232	2.92639	3.3976	3.19375	3.5675	3.49751	0.500401	3.02795	2.84682	3.06708	2.9577	2.99919	2.97975	0.0754786	1.17376	1.447	0.10711	0.0528184
Taenia tecta ventral part layer 3	0.0836293	0.0716834	0.0761242	0.0733921	0.0809012	0.077146	0.00449691	0.0754427	0.0727065	0.0730501	0.0710066	0.0699787	0.0724369	0.00187467	1.06501	1.367	0.107272	0.0529228
Primary motor area Layer 6b	0.444772	0.334181	0.40042	0.359792	0.394948	0.386822	0.0377115	0.368679	0.298677	0.37515	0.338647	0.339653	0.344161	0.027133	1.12396	1.299	0.107343	0.0530271
Temporal association areas layer 1	0.696684	0.519193	0.55062	0.574506	0.636286	0.595458	0.0635285	0.533902	0.551272	0.522616	0.507629	0.533886	0.529861	0.0144065	1.1238	1.424	0.107717	0.0531315
Anterodorsal nucleus	0.320181	0.181257	0.21028	0.186723	0.181942	0.216077	0.0531235	0.158737	0.181937	0.14849	0.140306	0.176142	0.161122	0.0158581	1.34107	1.402	0.107797	0.0532359
Entorhinal area medial part ventral zone layer 3	0.041644	0.0402792	0.0344778	0.0413044	0.0426694	0.040075	0.00290085	0.0375507	0.0399374	0.0375491	0.0351619	0.0300396	0.0360477	0.00336226	1.11172	1.283	0.10807	0.0533403
medial lemniscus	0.947572	1.01517	0.877989	1.05207	1.05854	0.990268	0.0686008	0.97461	0.964641	0.930536	0.836375	0.81107	0.903447	0.0671933	1.0961	1.279	0.108188	0.0534447
Perirhinal area	1.85521	1.44493	1.45762	1.56172	1.66957	1.59781	0.152137	1.42522	1.48553	1.4453	1.39692	1.45351	1.4413	0.0294959	1.10859	1.428	0.10859	0.0535491
Dentate gyrus granule cell layer	2.42423	1.43606	1.65835	1.57127	1.56306	1.73059	0.353991	1.28253	1.51796	1.30432	1.2689	1.4559	1.36592	0.101365	1.26698	1.401	0.108756	0.0536534
Primary somatosensory area mouth layer 1	0.392546	0.379581	0.36287	0.392904	0.399044	0.385389	0.0129228	0.369703	0.402104	0.347159	0.34445	0.339311	0.360546	0.0232386	1.0689	1.321	0.108874	0.0537578
Posterior auditory area layer 1	0.0303796	0.0228704	0.0208232	0.0221883	0.0252603	0.0243044	0.0033608	0.0218477	0.0191153	0.0194573	0.0218482	0.021847	0.0208231	0.00125944	1.16718	1.372	0.108929	0.0538622
Secondary motor area layer 6b	0.161456	0.116742	0.126987	0.137909	0.123912	0.133401	0.0155956	0.127331	0.100697	0.123912	0.111972	0.118793	0.116541	0.00946302	1.14467	1.307	0.109604	0.0539666
Paraventricular hypothalamic nucleus magnocellular division medial magnocellular part	0.0139951	0.00853374	0.0095582	0.0109235	0.0102407	0.0106502	0.00184947	0.00853424	0.00785093	0.00955796	0.00819307	0.00955807	0.00873885	0.00070288	1.21872	1.366	0.109706	0.054071
Visceral area layer 6a	0.476517	0.391869	0.408272	0.415092	0.458781	0.430106	0.0320638	0.402816	0.409273	0.381977	0.375857	0.413386	0.396662	0.0150007	1.08431	1.336	0.110545	0.0541754
Perirhinal area layer 6b	0.106499	0.0754382	0.0809033	0.080902	0.0880696	0.0863625	0.0108385	0.0754427	0.0768026	0.0774877	0.0757859	0.0710028	0.0753043	0.00227008	1.14685	1.412	0.110797	0.0542797
Hippocampal region	34.9936	20.9111	23.8641	23.1048	23.1961	25.2139	4.98995	19.3744	21.6734	19.4829	18.971	21.1145	20.1232	1.06618	1.25298	1.411	0.11083	0.0543841
Primary somatosensory area lower limb layer 6b	0.249181	0.170675	0.195602	0.187064	0.1915	0.198804	0.0265727	0.182974	0.158725	0.17614	0.176492	0.163511	0.171569	0.00900101	1.15875	1.373	0.110954	0.0544885
Ventral auditory area layer 5	0.999115	0.775887	0.805278	0.826429	0.887523	0.858846	0.0791204	0.765351	0.805233	0.767368	0.753762	0.798781	0.778099	0.0201691	1.10378	1.399	0.110958	0.0545929
Primary somatosensory area barrel field layer 6b	0.532838	0.370023	0.42534	0.39461	0.445127	0.433588	0.0558777	0.394623	0.37821	0.37276	0.368688	0.370034	0.376863	0.00946091	1.15052	1.415	0.112051	0.0546973
Ventral posteromedial nucleus of the thalamus parvicellular part	0.263176	0.150194	0.165562	0.165559	0.177163	0.184331	0.0403435	0.163516	0.135855	0.150879	0.130065	0.136544	0.143372	0.0121848	1.28568	1.374	0.1129	0.0548017
Pons sensory related	3.92614	4.05694	3.87482	4.54997	4.52091	4.18576	0.29177	3.95955	3.99886	3.87302	3.8149	3.80548	3.89036	0.0771476	1.07593	1.384	0.113196	0.0549061
Ventromedial hypothalamic nucleus dorsomedial part	0.159749	0.124251	0.095582	0.132106	0.130056	0.128349	0.020462	0.129379	0.096942	0.114696	0.0996823	0.0880708	0.105754	0.0145966	1.21366	1.271	0.113862	0.0550104
Anterior cingulate area dorsal part layer 5	0.842779	0.676896	0.709355	0.834963	0.799795	0.772757	0.0673986	0.731555	0.701805	0.726405	0.696752	0.66531	0.704365	0.0237271	1.0971	1.354	0.114028	0.0551148
cingulum bundle	0.776217	0.4755	0.565299	0.529788	0.583717	0.586104	0.101967	0.508299	0.436922	0.520226	0.476905	0.473124	0.483095	0.0292701	1.21323	1.373	0.11405	0.0552192
Nodulus (X)	1.34046	1.41592	1.8263	1.59005	1.92319	1.61918	0.225908	1.39313	1.42409	1.36679	1.38429	1.39172	1.392	0.0185813	1.1632	1.417	0.114582	0.0553236
Nucleus of Darkschewitsch	0.152581	0.0901163	0.114016	0.106845	0.110258	0.114763	0.0205971	0.0928525	0.100355	0.0928487	0.0952444	0.0890949	0.0940792	0.00370435	1.21986	1.398	0.114947	0.055428
Ammon's horn	24.2303	14.5213	16.5169	16.093	16.1864	17.5096	3.43048	13.6206	15.0482	13.6942	13.2775	14.6853	14.0652	0.679187	1.24489	1.393	0.115033	0.0555324
Cuneate nucleus	0.278537	0.238603	0.255682	0.253971	0.299368	0.265232	0.0213046	0.256369	0.265566	0.231098	0.233844	0.215398	0.240455	0.018127	1.10304	1.253	0.115381	0.0556367
Ventral auditory area	3.19737	2.51097	2.58242	2.68547	2.85475	2.7662	0.244617	2.52443	2.66556	2.47858	2.39647	2.53016	2.51904	0.0875	1.09811	1.345	0.115382	0.0557411
Primary auditory area	3.52574	2.62873	2.78587	2.90018	3.06537	2.98118	0.307429	2.71423	2.73793	2.6281	2.58218	2.7022	2.67293	0.0583654	1.11532	1.393	0.115383	0.0558455
Secondary motor area layer 1	1.99106	1.89039	1.85463	2.15158	2.15975	2.00948	0.127494	1.968	1.94362	1.90681	1.76526	1.77439	1.87162	0.0854124	1.07366	1.271	0.115494	0.0559499
Paraventricular hypothalamic nucleus magnocellular division posterior magnocellular part medial zone	0.00785092	0.00477889	0.00409637	0.00512038	0.00648575	0.00566646	0.00134121	0.0034137	0.00443748	0.00512034	0.0030724	0.00512039	0.00423286	0.000852631	1.33868	1.276	0.115585	0.0560543
Agranular insular area posterior part layer 6a	0.297652	0.257719	0.252951	0.272745	0.289128	0.274039	0.0173089	0.265586	0.258398	0.254993	0.242378	0.260457	0.256362	0.00778992	1.06895	1.317	0.115726	0.0561587
Secondary motor area layer 2/3	3.24379	3.03152	2.90501	3.47469	3.28964	3.18893	0.200099	3.07881	3.10385	3.03465	2.90273	2.74419	2.97285	0.133724	1.07269	1.27	0.115741	0.056263
Agranular insular area dorsal part layer 1	0.704876	0.619208	0.636644	0.683741	0.714115	0.671717	0.0374939	0.663964	0.621248	0.651648	0.629159	0.587821	0.630768	0.0263651	1.06492	1.263	0.116071	0.0563674
Anterior amygdalar area	0.75915	0.620232	0.590219	0.65848	0.690561	0.663728	0.0585634	0.607297	0.617493	0.64721	0.566687	0.579287	0.603595	0.0285034	1.09963	1.306	0.116078	0.0564718
Posterior auditory area layer 6b	0.0146778	0.00785104	0.00989956	0.00921668	0.00955794	0.0102406	0.00232506	0.0078515	0.00819228	0.00750983	0.00785169	0.00819263	0.00791958	0.000255368	1.29307	1.403	0.116514	0.0565762
Thalamus polymodal association cortex related	20.5861	11.4499	13.1169	12.4855	12.9097	14.1096	3.28884	11.087	11.4484	10.1925	10.2318	11.1997	10.8319	0.51948	1.3026	1.392	0.116959	0.0566806
Subiculum	8.53429	5.13355	5.80934	5.75223	6.26933	6.29975	1.17426	5.01506	5.31576	5.04182	4.94417	5.3474	5.13284	0.165679	1.22734	1.392	0.117734	0.056785
Posterior complex of the thalamus	1.73574	1.06228	1.27056	1.12239	1.17187	1.27257	0.241431	1.0719	1.12576	0.92917	0.948689	1.0886	1.03282	0.0788627	1.23213	1.335	0.119549	0.0568894
Paraventricular hypothalamic nucleus descending division dorsal parvicellular part	0.0334517	0.0167261	0.01502	0.0170679	0.0191159	0.0202763	0.00671513	0.0112652	0.0139951	0.0150197	0.0150206	0.0129717	0.0136545	0.0014157	1.48496	1.365	0.120031	0.0569937
Copula pyramidis molecular layer	1.45925	1.1937	1.76315	1.51154	1.86619	1.55876	0.237356	1.24429	1.40737	1.32821	1.31465	1.33096	1.3251	0.0518667	1.17634	1.36	0.120544	0.0570981
stria medullaris	0.809327	0.416446	0.490199	0.471416	0.471411	0.53176	0.140962	0.382334	0.428047	0.36013	0.382684	0.412362	0.393112	0.0240985	1.35269	1.371	0.120586	0.0572025
Vestibular nuclei	2.59422	2.64716	2.86848	2.99781	3.25584	2.8727	0.241201	2.75315	2.62699	2.61205	2.60266	2.58204	2.63538	0.0606605	1.09005	1.349	0.120971	0.0573069
Suprachiasmatic nucleus	0.135855	0.107184	0.0863651	0.108893	0.103089	0.108277	0.0159321	0.0972903	0.0945525	0.0989931	0.0853444	0.086364	0.0925089	0.00562448	1.17045	1.32	0.121161	0.0574113
Lateral preoptic area	1.31008	1.01244	1.06745	1.09269	1.08619	1.11377	0.102133	1.06268	1.00424	1.04523	0.985557	0.965706	1.01268	0.0362585	1.09982	1.319	0.121208	0.0575157
Interfascicular nucleus raphe	0.0498363	0.0416446	0.0443773	0.0443766	0.0416453	0.044376	0.00299103	0.0454022	0.0423268	0.0406213	0.0317481	0.0372082	0.0394613	0.00467803	1.12455	1.252	0.12123	0.05762
Bed nuclei of the stria terminalis anterior division anteromedial area	0.434873	0.302436	0.329416	0.320536	0.321898	0.341832	0.0473575	0.296309	0.306186	0.2922	0.288123	0.294252	0.295414	0.00602801	1.15713	1.375	0.12149	0.0577244
Dorsal auditory area layer 6a	0.656746	0.450581	0.505219	0.490532	0.507254	0.522066	0.0703512	0.446853	0.469008	0.457758	0.438329	0.454008	0.453191	0.0103223	1.15198	1.37	0.121828	0.0578288
Mammillary body	1.21723	0.964654	0.813471	1.00598	1.00631	1.00153	0.129071	0.959249	0.889545	0.89879	0.830231	0.782396	0.872042	0.0606817	1.14849	1.284	0.122026	0.0579332
cerebellar peduncles	3.13798	3.23497	3.24433	3.72047	3.8283	3.43321	0.283107	3.21365	3.27282	3.20977	2.98637	3.08794	3.15411	0.103198	1.08849	1.31	0.122648	0.0580376
Medial habenula	0.6349	0.290147	0.3854	0.316781	0.311657	0.387777	0.127626	0.25432	0.277855	0.235194	0.265592	0.283328	0.263258	0.0172557	1.47299	1.367	0.122769	0.058142
Tegmental reticular nucleus	0.720578	0.700108	0.532187	0.736652	0.723673	0.682639	0.0761334	0.634265	0.654358	0.61444	0.529135	0.591576	0.604755	0.0431674	1.12879	1.259	0.122824	0.0582463
Ventral anterior-lateral complex of the thalamus	1.74837	1.06774	1.13504	1.12273	1.11896	1.23857	0.255937	1.04937	1.09026	0.90903	0.918306	0.973899	0.988172	0.0714349	1.25339	1.333	0.122938	0.0583507
superior colliculus commissure	0.04062	0.0266253	0.029016	0.02765	0.0331114	0.0314045	0.00510844	0.0337956	0.0221874	0.0279912	0.018093	0.0228711	0.0249877	0.00541217	1.2568	1.219	0.123042	0.0584551
Anterolateral visual area layer 6b	0.166917	0.100015	0.110943	0.105138	0.118109	0.120225	0.0241116	0.101045	0.0976247	0.0983104	0.089441	0.0972875	0.0967418	0.0038823	1.24274	1.36	0.123308	0.0585595
Paraventricular hypothalamic nucleus parvicellular division medial parvicellular part dorsal zone	0.124591	0.0819239	0.0785138	0.0829501	0.0870455	0.0910048	0.0170121	0.081246	0.0750959	0.076805	0.0696411	0.069296	0.0744168	0.00451293	1.22291	1.333	0.123705	0.0586639
corpus callosum	11.2251	7.0376	8.32348	7.77854	8.53934	8.58081	1.42024	7.49579	6.84397	7.44428	7.05252	7.16104	7.19952	0.243802	1.19186	1.356	0.123727	0.0587683
Medial preoptic nucleus medial part	0.136879	0.0972846	0.0942165	0.117086	0.101041	0.109301	0.0158828	0.0918284	0.102403	0.0972864	0.0901237	0.0870467	0.0937377	0.00546195	1.16603	1.31	0.123817	0.0588727
superior cerebelar peduncles	1.35787	1.39134	1.3303	1.5368	1.56853	1.43697	0.0969442	1.42658	1.36709	1.34221	1.28665	1.26371	1.33725	0.0580743	1.07457	1.248	0.123935	0.058977
Tuberomammillary nucleus dorsal part	0.0293556	0.0238945	0.0180923	0.0225297	0.0184332	0.022461	0.00412078	0.0187753	0.019798	0.02014	0.0170689	0.0163853	0.0184335	0.00147975	1.21849	1.301	0.12502	0.0590814
Perirhinal area layer 6a	0.277172	0.211637	0.203453	0.210277	0.229391	0.226386	0.0267999	0.190484	0.205831	0.205837	0.19322	0.206523	0.200379	0.00702029	1.12979	1.328	0.125043	0.0591858
Lateral hypothalamic area	4.957	3.83335	3.57716	3.94747	4.08056	4.07911	0.469122	3.84587	3.66946	3.75867	3.46464	3.35761	3.61925	0.182029	1.12706	1.292	0.125131	0.0592902
Anterolateral visual area layer 1	0.274099	0.199007	0.215059	0.226662	0.233146	0.229595	0.0250949	0.208577	0.20549	0.19901	0.207558	0.206181	0.205363	0.00335222	1.11799	1.354	0.12567	0.0593946
epithalamus related	1.31213	0.706935	0.820298	0.767715	0.792626	0.87994	0.219313	0.683081	0.701805	0.626729	0.647935	0.682036	0.668317	0.0271022	1.31665	1.354	0.12585	0.059499
Ectorhinal area/Layer 1	0.933576	0.651295	0.728812	0.726411	0.83393	0.774805	0.0984035	0.690249	0.703853	0.675884	0.657493	0.672137	0.679923	0.0158701	1.13955	1.346	0.126137	0.0596033
Bed nuclei of the stria terminalis anterior division fusiform nucleus	0.0300383	0.0228704	0.0249196	0.0256019	0.0242362	0.0255333	0.00242692	0.02492	0.0215047	0.0232122	0.0228723	0.0232125	0.0231443	0.00108853	1.10322	1.27	0.1266	0.0597077
Field CA2 stratum lacunosum-moleculare	0.296969	0.173406	0.184337	0.183992	0.180577	0.203856	0.0467223	0.149861	0.179889	0.152927	0.144403	0.167266	0.158869	0.0129465	1.28317	1.312	0.127537	0.0598121
Anterior hypothalamic nucleus	1.06738	0.762575	0.635961	0.776591	0.815497	0.811601	0.141364	0.720631	0.681324	0.716847	0.646228	0.611716	0.675349	0.0417263	1.20175	1.307	0.127556	0.0599165
Prelimbic area layer 6b	0.0245768	0.0235531	0.0249196	0.0215056	0.021164	0.0231438	0.00154775	0.0235545	0.018774	0.0218468	0.0146792	0.0215057	0.020072	0.0031016	1.15304	1.253	0.127754	0.0600209
hypothalamus related	1.78591	1.0063	1.11728	1.08654	1.13296	1.2258	0.283441	0.998848	0.987852	0.925074	0.917623	0.941811	0.954242	0.0330622	1.28458	1.346	0.127862	0.0601253
Primary somatosensory area trunk layer 6a	1.37186	0.860542	1.03877	0.958193	0.996415	1.04516	0.173665	0.901557	0.890228	0.869092	0.84491	0.888559	0.878869	0.0199323	1.18921	1.345	0.128025	0.0602296
Cortical amygdalar area posterior part lateral zone layer 3	0.439993	0.444096	0.354336	0.457079	0.454685	0.430038	0.0383828	0.404864	0.412686	0.399045	0.38405	0.361158	0.392361	0.0182032	1.09603	1.254	0.12893	0.060334
Posterior auditory area	0.246109	0.16692	0.18775	0.186723	0.211981	0.199897	0.0271668	0.174099	0.171355	0.168971	0.167275	0.187748	0.17389	0.00730014	1.14956	1.307	0.129102	0.0604384
Primary somatosensory area nose layer 1	0.182619	0.159752	0.161124	0.178872	0.177505	0.171974	0.00957707	0.167612	0.171697	0.151903	0.160789	0.157025	0.161805	0.00712025	1.06285	1.205	0.12987	0.0605428
Superior colliculus motor related	9.20844	4.9185	5.82162	5.63378	5.98259	6.31299	1.49266	5.29362	5.01675	4.79332	4.73662	4.65102	4.89826	0.231782	1.28882	1.324	0.131053	0.0606472
Infracerebellar nucleus	0.0122884	0.00955778	0.0136546	0.0170679	0.0160437	0.0137225	0.00268276	0.00955835	0.0133125	0.00887525	0.0105827	0.0126303	0.0109918	0.00171884	1.24843	1.212	0.131427	0.0607516
Lingula (I) molecular layer	0.0686102	0.0651977	0.089096	0.0710026	0.098993	0.0785799	0.0131391	0.0672498	0.0651969	0.0675884	0.0658859	0.0648583	0.0661559	0.00108859	1.1878	1.333	0.131592	0.0608559
Superior colliculus motor related intermediate gray layer sublayer c	0.417805	0.223925	0.260119	0.261822	0.272743	0.287283	0.067302	0.254662	0.211634	0.212665	0.220189	0.21847	0.223524	0.0159093	1.28525	1.304	0.13176	0.0609603
extrapyramidal fiber systems	0.711361	0.693281	0.633231	0.775225	0.773169	0.717253	0.05321	0.708683	0.683373	0.677591	0.61687	0.628102	0.662924	0.0348161	1.08195	1.208	0.131895	0.0610647
Field CA1 stratum lacunosum-moleculare	3.66638	2.14129	2.46977	2.38883	2.36627	2.60651	0.541027	1.9598	2.30203	1.97474	1.98648	2.24444	2.0935	0.148121	1.24505	1.293	0.132024	0.0611691
Perirhinal area layer 2/3	0.563901	0.446144	0.455038	0.499066	0.522273	0.497284	0.0435096	0.451632	0.478907	0.452638	0.439694	0.45708	0.45599	0.012823	1.09056	1.287	0.132144	0.0612735
Medial mammillary nucleus	0.658794	0.540015	0.442749	0.580309	0.563919	0.557157	0.0697064	0.53834	0.50758	0.497014	0.462567	0.440354	0.489171	0.034377	1.13898	1.237	0.132166	0.0613779
mammillary related	0.429411	0.271031	0.27514	0.288789	0.307902	0.314455	0.0589031	0.283678	0.259081	0.267964	0.245451	0.237245	0.258684	0.0164058	1.2156	1.29	0.132546	0.0614823
Precommissural nucleus	0.1676	0.077145	0.0935338	0.0826088	0.0849974	0.101177	0.033629	0.0727117	0.0686103	0.0645162	0.0692997	0.0723682	0.0695012	0.00297361	1.45576	1.327	0.132719	0.0615866
olfactory nerve	3.85105	3.54833	3.5437	3.74709	3.93036	3.72411	0.156606	3.60179	3.58992	3.56887	3.4701	3.64811	3.57576	0.0588613	1.04149	1.254	0.135114	0.061691
Field CA2 pyramidal layer	0.178864	0.104794	0.122891	0.122206	0.119133	0.129578	0.0255011	0.103094	0.111961	0.104455	0.100706	0.108552	0.105754	0.00401504	1.22528	1.305	0.135287	0.0617954
external capsule	3.13729	1.94433	2.18405	2.1666	2.32258	2.35097	0.411419	1.90587	2.04943	1.97269	1.89738	2.0089	1.96685	0.0585972	1.19529	1.307	0.135417	0.0618998
Orbital area medial part layer 6a	0.114009	0.103088	0.104457	0.10548	0.111623	0.107731	0.00428737	0.103094	0.102062	0.110941	0.0890996	0.0768059	0.0964004	0.0120459	1.11754	1.253	0.136557	0.0620042
Endopiriform nucleus ventral part	0.617833	0.568688	0.48542	0.587478	0.615805	0.575045	0.0484145	0.524685	0.577897	0.518861	0.516846	0.501799	0.528017	0.0260582	1.08906	1.21	0.13688	0.0621086
Nucleus of the optic tract	0.256008	0.144049	0.166586	0.163169	0.157706	0.177504	0.0399969	0.145423	0.153264	0.131422	0.128699	0.14303	0.140368	0.00911191	1.26456	1.28	0.1377	0.0622129
Field CA2 stratum radiatum	0.32496	0.19218	0.21267	0.205839	0.203448	0.227819	0.0490164	0.177512	0.194908	0.174433	0.166251	0.19833	0.182287	0.0123151	1.24978	1.274	0.137873	0.0623173
Posterior pretectal nucleus	0.11947	0.0607602	0.0652006	0.0645168	0.0651988	0.0750294	0.0222818	0.0559846	0.0573459	0.0529101	0.0512067	0.0546175	0.054413	0.00217501	1.37889	1.302	0.137974	0.0624217
Nodulus (X) granular layer	0.593939	0.658122	0.872527	0.745186	0.908004	0.755556	0.120535	0.642799	0.658796	0.650283	0.639059	0.629808	0.644149	0.00985422	1.17295	1.303	0.138269	0.0625261
Nucleus y	0.0276489	0.0242358	0.03004	0.0348186	0.0382318	0.030995	0.00499571	0.0225304	0.028673	0.0296979	0.0218482	0.0273088	0.0260117	0.00321893	1.19158	1.186	0.138478	0.0626305
Cortical amygdalar area posterior part medial zone	1.12268	1.0633	0.885499	1.12512	1.13535	1.06639	0.093919	1.01353	1.01618	0.995052	0.960978	0.901189	0.977386	0.042892	1.09106	1.219	0.139003	0.0627349
Motor nucleus of trigeminal	0.516112	0.521241	0.499416	0.600791	0.605564	0.548625	0.0451483	0.530147	0.496657	0.489845	0.464615	0.53969	0.504191	0.0274324	1.08813	1.189	0.139014	0.0628392
Subparafascicular area	0.135514	0.0617842	0.0781724	0.0761229	0.0809012	0.0864989	0.0253834	0.0641775	0.0580286	0.0607613	0.0696411	0.0634929	0.0632203	0.00387857	1.36821	1.282	0.140823	0.0629436
Perirhinal area layer 5	0.549223	0.409278	0.416806	0.442401	0.480287	0.459599	0.0512244	0.397013	0.42395	0.409627	0.396681	0.434551	0.412364	0.0149372	1.11455	1.252	0.140919	0.063048
Midline group of the dorsal thalamus	2.76079	1.36096	1.55901	1.50403	1.67025	1.77101	0.504814	1.35353	1.31247	1.27701	1.28051	1.33813	1.31233	0.0304078	1.34951	1.283	0.143373	0.0631524
Primary auditory area layer 1	0.33008	0.262156	0.275822	0.293227	0.303123	0.292882	0.02334	0.282654	0.279562	0.255334	0.263885	0.274453	0.271178	0.0101679	1.08004	1.206	0.143894	0.0632568
Lateral terminal nucleus of the accessory optic tract	0.0160432	0.0109232	0.0143373	0.0129716	0.0139956	0.0136542	0.0016861	0.0116066	0.0136538	0.0116061	0.0105827	0.0126303	0.0120159	0.001044	1.13634	1.168	0.144567	0.0633612
Field CA1 pyramidal layer	3.03284	1.82212	2.08266	1.99012	2.08363	2.20228	0.426087	1.74679	1.90095	1.82216	1.72976	1.88192	1.81631	0.0690307	1.2125	1.265	0.144655	0.0634656
inferior colliculus commissure	0.00477882	0.0027308	0.00409637	0.00375494	0.00341355	0.0037549	0.000682689	0.00307233	0.00375479	0.00341356	0.00238964	0.00273088	0.00307224	0.000482668	1.2222	1.155	0.145302	0.0635699
Presubiculum layer 3	0.666645	0.320527	0.395982	0.37447	0.415429	0.434611	0.120276	0.307574	0.347148	0.31473	0.315774	0.345797	0.326205	0.0167931	1.33233	1.262	0.146069	0.0636743
Ventral medial nucleus of the thalamus	1.09401	0.639006	0.670439	0.689885	0.731524	0.764973	0.167228	0.655771	0.641387	0.620926	0.572832	0.579287	0.614041	0.0329928	1.2458	1.252	0.146078	0.0637787
Submedial nucleus of the thalamus	0.347488	0.185353	0.192529	0.19355	0.235194	0.230823	0.0609149	0.203115	0.171014	0.172043	0.164203	0.169314	0.175938	0.0138535	1.31196	1.242	0.146988	0.0638831
Supramammillary nucleus	0.400055	0.299022	0.253292	0.302785	0.31985	0.315001	0.0478963	0.300064	0.26659	0.286739	0.258423	0.243389	0.271041	0.0201613	1.16219	1.196	0.147368	0.0639875
Cerebellar nuclei	1.32885	1.2449	1.65391	1.5385	1.91807	1.53685	0.239806	1.26136	1.42375	1.32719	1.23169	1.35929	1.32066	0.0686944	1.1637	1.226	0.147943	0.0640919
Hypothalamic medial zone	4.77984	3.46094	2.94734	3.60952	3.66615	3.69276	0.599797	3.47651	3.16222	3.2835	3.01368	2.79983	3.14715	0.230538	1.17337	1.201	0.148443	0.0641962
Temporal association areas layer 6b	0.309941	0.194569	0.212329	0.220176	0.238949	0.235193	0.0399997	0.188436	0.206855	0.19901	0.197999	0.205157	0.199492	0.00649619	1.17896	1.246	0.149264	0.0643006
Olivary pretectal nucleus	0.155653	0.0805585	0.0921683	0.0863637	0.0908004	0.101109	0.0275717	0.0809046	0.0713411	0.0778291	0.0733962	0.0791954	0.0765333	0.00359652	1.32111	1.25	0.149486	0.064405
Paraventricular hypothalamic nucleus magnocellular division	0.0692929	0.0348176	0.0443773	0.044718	0.0498378	0.0486087	0.0114244	0.0392575	0.0389133	0.0399386	0.0355033	0.0385736	0.0384373	0.00153495	1.26462	1.248	0.149859	0.0645094
Periventricular hypothalamic nucleus intermediate part	0.198321	0.137905	0.103775	0.154635	0.122888	0.143505	0.032136	0.124259	0.118447	0.119133	0.111631	0.10036	0.114766	0.00824742	1.25042	1.225	0.149867	0.0646138
Tuberal nucleus	0.555026	0.498712	0.46801	0.537981	0.554019	0.52275	0.0341343	0.536633	0.472421	0.510668	0.462225	0.438647	0.484119	0.0350612	1.0798	1.116	0.153036	0.0647182
Paraventricular nucleus of the thalamus	1.32203	0.556058	0.741443	0.669404	0.720601	0.801906	0.267877	0.553702	0.575849	0.528077	0.570784	0.602841	0.56625	0.0247638	1.41617	1.239	0.153455	0.0648225
Field CA2	1.07489	0.627059	0.696724	0.684082	0.684076	0.753367	0.162569	0.589545	0.656748	0.599079	0.564639	0.640732	0.610149	0.0338378	1.23473	1.22	0.153891	0.0649269
Fastigial nucleus	0.429411	0.399038	0.528432	0.476195	0.628093	0.492234	0.0808178	0.409644	0.452282	0.405189	0.392243	0.444792	0.42083	0.0234537	1.16967	1.2	0.154594	0.0650313
Nucleus of reuniens	1.19914	0.657098	0.661905	0.694323	0.78853	0.8002	0.20499	0.675912	0.608277	0.635946	0.583073	0.602841	0.62121	0.0321513	1.28813	1.22	0.156204	0.0651357
fasciculus retroflexus	0.437603	0.250209	0.283674	0.252947	0.278546	0.300596	0.0697895	0.264903	0.236552	0.233487	0.229406	0.234173	0.239704	0.0128079	1.25403	1.214	0.156709	0.0652401
Parabrachial nucleus lateral division superior lateral part	0.142341	0.109573	0.128694	0.124254	0.132787	0.12753	0.0107845	0.117773	0.118788	0.116061	0.124944	0.112307	0.117975	0.00412453	1.08099	1.17	0.157144	0.0653445
Accessory supraoptic group	0.0030721	0.00102405	0.00204819	0.00273087	0.00273084	0.00232121	0.00072892	0.00136548	0.00170672	0.00238949	0.00170689	0.00102408	0.00163853	0.000452851	1.41664	1.125	0.157614	0.0654489
Nucleus circularis	0.0030721	0.00102405	0.00204819	0.00273087	0.00273084	0.00232121	0.00072892	0.00136548	0.00170672	0.00238949	0.00170689	0.00102408	0.00163853	0.000452851	1.41664	1.125	0.157614	0.0655532
Cortical amygdalar area	3.05059	2.82125	2.36429	2.93398	3.0483	2.84368	0.254227	2.6818	2.68297	2.74518	2.55077	2.41751	2.61565	0.117606	1.08718	1.151	0.157785	0.0656576
Temporal association areas layer 2/3	1.1179	0.798758	0.856824	0.901528	0.991636	0.93333	0.11175	0.861617	0.843805	0.809696	0.829206	0.837696	0.836404	0.017072	1.11588	1.213	0.158334	0.065762
Superior colliculus motor related intermediate gray layer	5.08842	2.6004	3.07672	3.00054	3.17597	3.38841	0.872206	2.81357	2.68502	2.56836	2.54531	2.55644	2.63374	0.102992	1.28654	1.215	0.158879	0.0658664
Field CA1	14.159	8.10056	9.36225	8.99548	9.18962	9.96137	2.14335	7.76752	8.6152	7.94062	7.69056	8.51009	8.1048	0.383949	1.22907	1.206	0.159019	0.0659708
Cortical amygdalar area posterior part	2.244	2.16142	1.78158	2.24034	2.30756	2.14698	0.188489	2.04822	2.0194	2.04848	1.95234	1.82764	1.97921	0.0835111	1.08476	1.151	0.159108	0.0660752
Dopaminergic A13 group	0.0481295	0.0314041	0.0245782	0.0269673	0.0324287	0.0327016	0.00822983	0.0262855	0.0269662	0.0293566	0.0232137	0.021847	0.0255338	0.00269095	1.28072	1.171	0.160556	0.0661795
Primary auditory area layer 6a	0.675862	0.462187	0.500781	0.498383	0.536269	0.534696	0.0743728	0.468359	0.475835	0.486773	0.449594	0.472783	0.470669	0.0121653	1.13604	1.202	0.160864	0.0662839
Posterior parietal association areas layer 5	1.51181	1.00835	1.06096	1.09269	1.14729	1.16422	0.179546	1.04971	1.01243	0.985494	0.995116	1.00667	1.00988	0.0219819	1.15283	1.207	0.161033	0.0663883
alveus	2.46724	1.35516	1.56277	1.51939	1.60232	1.70137	0.39206	1.35592	1.4019	1.35757	1.2846	1.42347	1.36469	0.0477099	1.24671	1.206	0.161351	0.0664927
Epithalamus	1.44252	0.644809	0.826101	0.711391	0.728452	0.870655	0.291756	0.601835	0.65743	0.552996	0.632232	0.657459	0.62039	0.0394272	1.4034	1.202	0.161807	0.0665971
dorsal column	0.04062	0.0368657	0.0433532	0.0413044	0.0512033	0.0426693	0.00475479	0.0426712	0.0389133	0.0389145	0.0337964	0.0372082	0.0383007	0.00287527	1.11406	1.112	0.162565	0.0667015
Primary somatosensory area nose layer 4	0.211633	0.185694	0.193553	0.190819	0.201741	0.196688	0.00909977	0.189119	0.202759	0.183991	0.175468	0.182627	0.186793	0.00909699	1.05298	1.088	0.162581	0.0668058
Tuberomammillary nucleus	0.0730477	0.0546159	0.0488151	0.0529106	0.0505206	0.055982	0.00876047	0.0522296	0.0515431	0.0501793	0.0447205	0.0426699	0.0482685	0.00384698	1.1598	1.14	0.162603	0.0669102
Paraventricular hypothalamic nucleus magnocellular division posterior magnocellular part	0.0552978	0.0262839	0.0348191	0.0337945	0.0395972	0.0379585	0.00966257	0.0307233	0.0310624	0.0303807	0.0273102	0.0290156	0.0296984	0.00138174	1.27813	1.197	0.162994	0.0670146
Posterior hypothalamic nucleus	1.35889	0.862249	0.805961	0.893676	0.960232	0.976202	0.197729	0.904288	0.794992	0.843831	0.782438	0.701494	0.805409	0.0673615	1.21206	1.156	0.163918	0.067119
Parafascicular nucleus	1.18617	0.577905	0.699455	0.616835	0.698754	0.755824	0.220276	0.612759	0.566291	0.53627	0.566004	0.560512	0.568367	0.0247888	1.32982	1.196	0.164263	0.0672234
Anterior hypothalamic nucleus posterior part	0.183985	0.129713	0.0966061	0.1205	0.124936	0.131148	0.0287711	0.115724	0.103769	0.113671	0.10651	0.0931912	0.106573	0.00801343	1.23059	1.164	0.165584	0.0673278
Field CA1 stratum radiatum	4.56514	2.55978	2.98421	2.86024	2.87114	3.1681	0.712537	2.4483	2.73383	2.48678	2.40876	2.736	2.56273	0.142735	1.23622	1.178	0.165707	0.0674322
Cortical amygdalar area anterior part layer 2	0.411661	0.340325	0.291866	0.351258	0.371053	0.353233	0.0391606	0.318157	0.338273	0.342038	0.303143	0.292204	0.318763	0.01935	1.10814	1.116	0.166897	0.0675365
Subiculum dorsal part molecular layer	0.489488	0.24031	0.278895	0.276159	0.271719	0.311314	0.0901577	0.237252	0.25123	0.224953	0.215068	0.24851	0.235403	0.0137725	1.32247	1.177	0.168124	0.0676409
Postpiriform transition area	1.17969	1.08105	1.00702	1.14526	1.24765	1.13213	0.0825101	1.12038	1.06056	1.06981	1.06954	0.967754	1.05761	0.0496251	1.07047	1.095	0.168378	0.0677453
Bed nuclei of the stria terminalis anterior division dorsomedial nucleus	0.053591	0.0348176	0.0283332	0.0334531	0.041304	0.0382998	0.00869247	0.0303819	0.0300384	0.0300393	0.0317481	0.0327705	0.0309956	0.00108849	1.23565	1.179	0.168558	0.0678497
Superior colliculus motor related intermediate gray layer sublayer a	0.831515	0.415764	0.491906	0.491556	0.503499	0.546848	0.145721	0.458459	0.431119	0.405872	0.417164	0.413045	0.425132	0.0185855	1.2863	1.172	0.170587	0.0679541
mammillothalamic tract	0.226311	0.124593	0.124939	0.137567	0.146783	0.152039	0.0380555	0.12972	0.119812	0.127667	0.11402	0.109918	0.120228	0.00762177	1.26459	1.159	0.171197	0.0680585
Anteromedial nucleus ventral part	0.166235	0.0802171	0.0989956	0.10309	0.103431	0.110394	0.029191	0.0884147	0.0836295	0.0870457	0.0836375	0.0877294	0.0860914	0.002053	1.28228	1.174	0.171361	0.0681628
Anterior cingulate area dorsal part layer 2/3	0.960201	0.873855	0.820639	0.953073	0.925755	0.906705	0.052652	0.883465	0.879987	0.908006	0.816234	0.774886	0.852516	0.0492634	1.06356	1.063	0.171393	0.0682672
Dorsomedial nucleus of the hypothalamus anterior part	0.430094	0.290488	0.221204	0.29152	0.301758	0.307013	0.0679011	0.27924	0.259763	0.263868	0.228382	0.216763	0.249603	0.0232976	1.23	1.131	0.171455	0.0683716
Temporal association areas	5.25295	3.53706	3.82464	3.94303	4.36184	4.1839	0.596658	3.66392	3.78654	3.62486	3.61587	3.7652	3.69128	0.0712529	1.13346	1.159	0.174447	0.068476
Anterior cingulate area dorsal part layer 1	0.684054	0.669386	0.60046	0.62571	0.681003	0.652123	0.0332218	0.646213	0.638315	0.637311	0.607311	0.544469	0.614724	0.0375474	1.06084	1.055	0.17461	0.0685804
Dorsomedial nucleus of the hypothalamus	0.711361	0.49837	0.373794	0.507259	0.499061	0.517969	0.108668	0.482697	0.449551	0.452296	0.380295	0.364572	0.425882	0.0454378	1.21623	1.106	0.174793	0.0686848
Anteromedial nucleus	0.839365	0.407913	0.460159	0.468344	0.502475	0.535651	0.154848	0.430467	0.417465	0.391876	0.390536	0.409632	0.407995	0.0152445	1.31289	1.16	0.174816	0.0687891
Ventral auditory area layer 6a	0.686785	0.489495	0.516143	0.536957	0.550264	0.555929	0.0685735	0.484062	0.536594	0.497697	0.468029	0.507602	0.498797	0.0231135	1.11454	1.117	0.176381	0.0688935
Anteromedial nucleus dorsal part	0.673131	0.327695	0.361163	0.365254	0.399044	0.425257	0.12598	0.342052	0.333835	0.304831	0.306899	0.321902	0.321904	0.0145944	1.32107	1.153	0.176597	0.0689979
Basomedial amygdalar nucleus anterior part	0.405176	0.343056	0.287087	0.351599	0.36286	0.349956	0.0379961	0.31645	0.343393	0.325312	0.301778	0.303469	0.31808	0.0153294	1.10021	1.1	0.177485	0.0691023
Bed nucleus of the accessory olfactory tract	0.0938697	0.0778277	0.0737347	0.085681	0.0791944	0.0820615	0.00704294	0.0774909	0.0733892	0.075781	0.0747617	0.0798781	0.0762602	0.00225043	1.07607	1.11	0.179688	0.0692067
Ectorhinal area/Layer 6a	0.789529	0.451264	0.533552	0.521254	0.599078	0.578936	0.115276	0.474845	0.498022	0.475167	0.476905	0.501457	0.485279	0.0118775	1.19299	1.143	0.179846	0.0693111
Posterior parietal association areas layer 6b	0.318816	0.180233	0.200722	0.192526	0.21164	0.220787	0.0500783	0.186729	0.178865	0.180919	0.178199	0.176483	0.180239	0.00354237	1.22497	1.142	0.180832	0.0694154
Posterior parietal association areas	4.72728	3.13837	3.29724	3.4071	3.61393	3.63678	0.566774	3.29627	3.19021	3.10497	3.11029	3.18727	3.1778	0.0694825	1.14443	1.137	0.181134	0.0695198
Visceral area layer 4	0.223239	0.190132	0.193895	0.213349	0.219491	0.208021	0.0134991	0.20687	0.199687	0.199693	0.19083	0.184676	0.196351	0.00774264	1.05943	1.061	0.181462	0.0696242
Posterior parietal association areas layer 6a	0.958836	0.559472	0.623672	0.61308	0.65506	0.682024	0.141795	0.597738	0.566291	0.565285	0.54757	0.560171	0.567411	0.0165626	1.20199	1.135	0.18173	0.0697286
Paraventricular hypothalamic nucleus magnocellular division posterior magnocellular part lateral zone	0.0474468	0.021505	0.0307228	0.0286741	0.0331114	0.032292	0.00851177	0.0273096	0.0266249	0.0252603	0.0242378	0.0238952	0.0254656	0.00132364	1.26807	1.121	0.184887	0.069833
Intermediodorsal nucleus of the thalamus	0.397666	0.15941	0.221204	0.194233	0.227001	0.239903	0.0824259	0.165564	0.179206	0.160096	0.182978	0.181945	0.173958	0.00933073	1.37909	1.124	0.185282	0.0699374
Ventral premammillary nucleus	0.112644	0.091823	0.0641765	0.0959217	0.0890937	0.0907317	0.0155957	0.0921698	0.0836295	0.0740742	0.0696411	0.0669065	0.0772842	0.0093623	1.174	1.045	0.185654	0.0700418
Ectorhinal area	5.1857	3.29402	3.74067	3.75904	4.31336	4.05856	0.649717	3.47344	3.62474	3.54464	3.47079	3.59179	3.54108	0.0618058	1.14614	1.121	0.186714	0.0701461
Cortical amygdalar area posterior part medial zone layer 2	0.289119	0.267959	0.226324	0.288789	0.295613	0.273561	0.0253887	0.268999	0.254985	0.261137	0.248864	0.225297	0.251857	0.0148602	1.08618	1.043	0.187104	0.0702505
Cortical amygdalar area posterior part lateral zone	1.12132	1.09812	0.896081	1.11522	1.17221	1.08059	0.0955023	1.03469	1.00321	1.05342	0.991361	0.92645	1.00183	0.0436702	1.07862	1.061	0.187703	0.0703549
Mediodorsal nucleus of the thalamus medial part	1.06329	0.474134	0.583391	0.489849	0.571087	0.63635	0.217769	0.4885	0.433167	0.432839	0.462225	0.500092	0.463365	0.0276611	1.37332	1.114	0.187933	0.0704593
Intralaminar nuclei of the dorsal thalamus	3.04718	1.47053	1.73959	1.53202	1.77368	1.9126	0.579097	1.53138	1.46096	1.34835	1.44369	1.48048	1.45297	0.0599995	1.31634	1.116	0.188008	0.0705637
doral tegmental decussation	0.0665621	0.0395965	0.0454014	0.0430112	0.0498378	0.0488818	0.00944777	0.0423298	0.0440335	0.0406213	0.036186	0.0433527	0.0413047	0.00280568	1.18345	1.087	0.188412	0.0706681
Temporal association areas layer 6a	0.930504	0.583366	0.632548	0.649264	0.718211	0.702779	0.121781	0.57828	0.626027	0.605565	0.596045	0.625371	0.606258	0.0181308	1.15921	1.109	0.188984	0.0707724
Ectorhinal area/Layer 2/3	1.60944	1.04043	1.19546	1.1869	1.3859	1.28363	0.196411	1.10365	1.1616	1.12852	1.10128	1.14697	1.1284	0.023642	1.13756	1.11	0.18968	0.0708768
Primary somatosensory area upper limb layer 6b	0.297994	0.200372	0.24783	0.210618	0.261478	0.243658	0.0353627	0.22428	0.189788	0.232122	0.217458	0.211302	0.21499	0.014385	1.13335	1.062	0.1903	0.0709812
Posterior parietal association areas layer 4	0.418488	0.293219	0.304155	0.322925	0.337942	0.335346	0.0443196	0.310305	0.304821	0.289811	0.294268	0.302445	0.30033	0.00736945	1.11659	1.102	0.190362	0.0710856
Interposed nucleus	0.581309	0.542063	0.73564	0.689203	0.844512	0.678545	0.108628	0.571453	0.635926	0.589521	0.557811	0.606937	0.59233	0.0273834	1.14555	1.088	0.190654	0.07119
Subparafascicular nucleus magnocellular part	0.157701	0.0836306	0.0931924	0.0873878	0.106503	0.105683	0.0271425	0.104118	0.0798747	0.0781705	0.0798824	0.0771473	0.0838385	0.0101932	1.26055	1.066	0.191011	0.0712944
Olfactory areas	51.5269	47.2923	46.5993	50.3087	52.9018	49.7258	2.42357	49.2221	47.4527	47.9547	46.4178	47.8381	47.7771	0.902898	1.04079	1.066	0.191171	0.0713987
Supramammillary nucleus lateral part	0.293897	0.212661	0.182288	0.220859	0.228367	0.227614	0.0366543	0.224963	0.191153	0.210275	0.185709	0.175459	0.197512	0.0177905	1.15241	1.045	0.191759	0.0715031
Lateral vestibular nucleus	0.425315	0.448875	0.473472	0.523644	0.532173	0.480696	0.041536	0.462897	0.443407	0.449565	0.434574	0.449571	0.448003	0.00925421	1.07297	1.086	0.192869	0.0716075
Dorsomedial nucleus of the hypothalamus posterior part	0.125273	0.0843133	0.070321	0.0908014	0.0805598	0.0902538	0.0187256	0.0843183	0.0832882	0.0785118	0.064179	0.0648583	0.0750311	0.00880681	1.20288	1.04	0.194277	0.0717119
Cochlear nucleus subpedunclular granular region	0.0450574	0.0443754	0.0498392	0.0508624	0.0617853	0.0503839	0.00624483	0.0423298	0.0460816	0.0457417	0.0402826	0.0512039	0.0451279	0.00372856	1.11647	1.022	0.194595	0.0718163
Central lateral nucleus of the thalamus	0.55605	0.288782	0.340681	0.283669	0.310633	0.355963	0.102042	0.27173	0.305162	0.243728	0.256375	0.30381	0.276161	0.0247733	1.28897	1.075	0.195764	0.0719207
hippocampal commissures	1.80674	0.841426	1.03502	0.96229	1.0838	1.14585	0.340374	0.868444	0.918559	0.873871	0.839106	0.911089	0.882214	0.0292308	1.29884	1.091	0.196578	0.0720251
Superior vestibular nucleus	0.361142	0.382653	0.437287	0.438646	0.481652	0.420276	0.043142	0.415447	0.387085	0.378563	0.369371	0.380275	0.386148	0.0157022	1.08838	1.051	0.196772	0.0721294
Subiculum dorsal part stratum radiatum	0.460815	0.211637	0.254658	0.249192	0.253627	0.285986	0.0888542	0.216428	0.222557	0.215737	0.199023	0.232466	0.217242	0.0109075	1.31644	1.086	0.197336	0.0722338
Granular lamina of the cochlear nuclei	0.0331104	0.0382311	0.0413051	0.0416457	0.0467656	0.0402116	0.00448458	0.0320887	0.04062	0.0368664	0.0358447	0.0368668	0.0364573	0.00272482	1.10298	1.012	0.198066	0.0723382
Dorsomedial nucleus of the hypothalamus ventral part	0.155994	0.123568	0.0822688	0.124937	0.116743	0.120702	0.0235138	0.119138	0.1065	0.109917	0.0877341	0.0829504	0.101248	0.0137128	1.19215	1.011	0.199553	0.0724426
Lateral habenula	0.80762	0.354662	0.440701	0.39461	0.416795	0.482878	0.164824	0.347514	0.379576	0.317802	0.36664	0.37413	0.357132	0.0224606	1.3521	1.069	0.20261	0.072547
Orbital area medial part layer 2/3	0.282633	0.276152	0.275481	0.28401	0.275474	0.27875	0.00376621	0.276168	0.275124	0.245435	0.249547	0.286059	0.266467	0.0160097	1.0461	1.056	0.202612	0.0726514
Temporal association areas layer 5	1.76748	1.14147	1.24939	1.26371	1.41833	1.36808	0.218347	1.16987	1.23396	1.17802	1.18185	1.24562	1.20186	0.0314246	1.1383	1.066	0.203529	0.0727557
Rhomboid nucleus	0.325301	0.151559	0.174437	0.161804	0.204813	0.203583	0.0634323	0.161126	0.147802	0.150197	0.162154	0.15566	0.155388	0.00571458	1.31016	1.07	0.203609	0.0728601
Medial group of the dorsal thalamus	3.20864	1.44937	1.75188	1.51836	1.78324	1.9423	0.6462	1.52012	1.4415	1.3289	1.43993	1.52827	1.45174	0.0719258	1.33791	1.067	0.204125	0.0729645
Posterior auditory area layer 2/3	0.0597352	0.0433514	0.0460842	0.0450593	0.0556409	0.0499742	0.00648906	0.0443781	0.0464229	0.0433522	0.0399412	0.0498385	0.0447866	0.00328334	1.11583	1.009	0.204204	0.0730689
Anterior hypothalamic nucleus anterior part	0.288777	0.221536	0.181947	0.224614	0.241338	0.231642	0.034582	0.222573	0.195249	0.217102	0.194244	0.195258	0.204885	0.012336	1.1306	1.031	0.204749	0.0731733
Posterior parietal association areas layer 2/3	1.03427	0.743459	0.74315	0.799462	0.842806	0.83263	0.107538	0.77525	0.753007	0.720602	0.739424	0.766694	0.750995	0.0194754	1.1087	1.056	0.205209	0.0732777
Field CA1 stratum oriens	2.8946	1.57738	1.82562	1.75629	1.86858	1.98449	0.465788	1.61263	1.67839	1.65694	1.56556	1.64774	1.63225	0.0395261	1.2158	1.066	0.205292	0.073382
Folium-tuber vermis (VII) granular layer	0.325642	0.334181	0.409637	0.417823	0.601809	0.417818	0.0994093	0.312012	0.385378	0.325653	0.335233	0.351942	0.342044	0.0252698	1.22154	1.045	0.20566	0.0734864
Superior colliculus zonal layer	1.58896	0.80183	0.893691	0.898797	0.939409	1.02454	0.285779	0.840452	0.798747	0.908347	0.7285	0.761573	0.807524	0.0627422	1.26874	1.049	0.206007	0.0735908
posterior commissure	0.082264	0.0382311	0.0464255	0.044718	0.0532514	0.052978	0.0154037	0.0402816	0.0419854	0.0406213	0.0423308	0.0416459	0.041373	0.00079033	1.2805	1.064	0.206461	0.0736952
Cortical amygdalar area anterior part	0.806596	0.659828	0.582709	0.69364	0.74074	0.696703	0.0753388	0.633582	0.663575	0.696707	0.598435	0.589869	0.636434	0.0399744	1.0947	0.999	0.206601	0.0737996
Interanterodorsal nucleus of the thalamus	0.143365	0.0631496	0.0764656	0.0672476	0.0774876	0.085543	0.029417	0.0634948	0.0648555	0.0607613	0.058717	0.0689546	0.0633566	0.00351755	1.35018	1.059	0.206624	0.073904
Paracentral nucleus	0.357387	0.185011	0.191505	0.184334	0.202765	0.224201	0.0669214	0.18434	0.176817	0.160096	0.171713	0.176483	0.17389	0.00799377	1.28933	1.056	0.207808	0.0740084
Entorhinal area lateral part layer 4/5	0.219826	0.17443	0.168975	0.176482	0.192183	0.186379	0.0184173	0.169319	0.171355	0.165216	0.173761	0.182627	0.172456	0.00580735	1.08074	1.02	0.211374	0.0741127
mammillary peduncle	0.0354998	0.0293561	0.026285	0.0290155	0.030722	0.0301757	0.00302654	0.0320887	0.0266249	0.0276498	0.0273102	0.0232125	0.0273772	0.00283509	1.10222	0.954	0.214236	0.0742171
Nucleus of the lateral olfactory tract molecular layer	0.285705	0.237921	0.200722	0.239634	0.252944	0.243385	0.0273731	0.224621	0.224605	0.236218	0.215409	0.213691	0.222909	0.00805178	1.09186	1.015	0.214424	0.0743215
Mediodorsal nucleus of thalamus	2.41979	1.08447	1.31596	1.10464	1.29032	1.44303	0.497313	1.11764	1.06704	0.974912	1.0709	1.1538	1.07686	0.0601792	1.34004	1.034	0.215607	0.0744259
Flocculus granular layer	0.674155	0.672117	0.782407	0.810726	0.963304	0.780542	0.107136	0.624706	0.741401	0.71514	0.682755	0.733582	0.699517	0.042512	1.11583	0.994	0.216295	0.0745303
Folium-tuber vermis (VII)	0.705217	0.720589	0.884475	0.908014	1.28145	0.899948	0.207815	0.669085	0.839709	0.709337	0.731572	0.777617	0.745464	0.058733	1.20723	1.012	0.216323	0.0746347
corpus callosum splenium	0.202417	0.110597	0.12016	0.115038	0.132104	0.136063	0.033947	0.121186	0.112644	0.111965	0.105827	0.104456	0.111216	0.00594545	1.22342	1.02	0.218803	0.074739
Central medial nucleus of the thalamus	0.622271	0.267277	0.333513	0.285376	0.356716	0.37303	0.128698	0.301429	0.264884	0.258065	0.28744	0.284011	0.279166	0.0157279	1.33623	1.024	0.219219	0.0748434
Pons motor related	5.95919	6.39791	5.40379	6.99068	6.83495	6.31731	0.581488	6.11086	6.05444	5.9826	5.50847	5.76386	5.88404	0.221671	1.07363	0.985	0.221044	0.0749478
Lateral visual area layer 6a	0.268297	0.136881	0.16522	0.16078	0.17375	0.180986	0.0453378	0.144058	0.156677	0.140639	0.150889	0.150198	0.148492	0.00560345	1.21882	1.006	0.22592	0.0750522
Subiculum dorsal part	2.75772	1.21589	1.4665	1.43268	1.50435	1.67543	0.550341	1.30335	1.31657	1.26267	1.18219	1.34598	1.28215	0.0567088	1.30673	1.005	0.226762	0.0751566
Folium-tuber vermis (VII) molecular layer	0.379575	0.386408	0.474838	0.490191	0.679638	0.48213	0.108451	0.357073	0.45433	0.383684	0.39634	0.425675	0.40342	0.0336894	1.19511	0.98	0.22705	0.075261
Lateral visual area layer 1	0.14473	0.0890922	0.101385	0.108211	0.115719	0.111827	0.0186373	0.0986558	0.0996727	0.0952382	0.0983168	0.101042	0.0985852	0.00192354	1.13432	1	0.228966	0.0753653
Superior colliculus optic layer	0.880668	0.422591	0.457428	0.473123	0.486431	0.544048	0.169657	0.440025	0.424292	0.446152	0.399753	0.408266	0.423698	0.0177911	1.28405	0.998	0.229614	0.0754697
Mediodorsal nucleus of the thalamus lateral part	0.930846	0.421567	0.502147	0.437622	0.505547	0.559545	0.188668	0.433539	0.448186	0.378563	0.420236	0.447864	0.425678	0.0257294	1.31448	0.994	0.229997	0.0755741
Taenia tecta ventral part	0.493925	0.384701	0.457428	0.438646	0.455709	0.446082	0.0355902	0.424322	0.432825	0.416795	0.397364	0.430796	0.420421	0.0128181	1.06104	0.959	0.232683	0.0756785
Superior colliculus sensory related	4.68939	2.3123	2.53258	2.57179	2.67759	2.95673	0.874458	2.4367	2.30237	2.57758	2.16399	2.21747	2.33962	0.150466	1.26376	0.984	0.232843	0.0757829
Posterior auditory area layer 4	0.0273075	0.0197983	0.0208232	0.0218469	0.0262843	0.0232121	0.0030145	0.0194581	0.0201394	0.0225295	0.018093	0.0238952	0.020823	0.00210397	1.11473	0.919	0.234017	0.0758873
Temporal association areas layer 4	0.430435	0.299705	0.322931	0.333849	0.358423	0.349068	0.0448545	0.331811	0.324619	0.309951	0.303143	0.317464	0.317398	0.0101837	1.09978	0.974	0.234244	0.0759916
Primary visual area layer 1	1.32885	0.745507	0.80323	0.81926	0.938385	0.927047	0.210467	0.78515	0.79704	0.766002	0.771514	0.780348	0.780011	0.0108165	1.18851	0.987	0.235024	0.076096
Retrosplenial area ventral part layer 1	1.3053	0.879658	0.909394	0.937712	0.982079	1.00283	0.154959	0.899168	0.918559	0.961599	0.824427	0.863981	0.893547	0.046776	1.1223	0.955	0.238016	0.0762004
Cortical amygdalar area posterior part lateral zone layer 2	0.376161	0.360465	0.287429	0.352282	0.388462	0.35296	0.0350709	0.33898	0.325643	0.349207	0.321578	0.302103	0.327502	0.0160405	1.07773	0.934	0.238117	0.0763048
Posterior parietal association areas layer 1	0.48505	0.353638	0.364577	0.386418	0.419184	0.401773	0.0472748	0.376531	0.374797	0.362861	0.355716	0.374813	0.368943	0.00822495	1.08898	0.968	0.239207	0.0764092
Field CA2 stratum oriens	0.274099	0.156679	0.176827	0.172045	0.180918	0.192114	0.0418068	0.159078	0.16999	0.167264	0.153279	0.166583	0.163239	0.00615602	1.17689	0.966	0.240749	0.0765136
Paraventricular hypothalamic nucleus descending division	0.0788505	0.0450581	0.0395982	0.0464248	0.0491551	0.0518174	0.0138705	0.0450608	0.0436922	0.0457417	0.0419895	0.034136	0.042124	0.00419519	1.23011	0.946	0.241711	0.076618
Posterior auditory area layer 6a	0.0324277	0.0194569	0.0242369	0.0235537	0.0256016	0.0250554	0.00421704	0.0235545	0.020822	0.02014	0.0232137	0.0228711	0.0221203	0.00137283	1.13269	0.936	0.244708	0.0767223
Ectorhinal area/Layer 5	1.66235	1.02849	1.14562	1.18998	1.33982	1.27325	0.218614	1.08726	1.12985	1.14286	1.12074	1.14117	1.12438	0.0202193	1.1324	0.959	0.245428	0.0768267
Flocculus	1.34524	1.37939	1.6027	1.66242	1.9645	1.59085	0.223569	1.27297	1.51216	1.45383	1.41126	1.51973	1.43399	0.0897786	1.10939	0.921	0.246988	0.0769311
Tuberomammillary nucleus ventral part	0.0436921	0.0307215	0.0307228	0.0303809	0.0320874	0.0335209	0.00511925	0.0334542	0.0317451	0.0300393	0.0276516	0.0262847	0.029835	0.00261384	1.12354	0.907	0.247333	0.0770355
Retrosplenial area ventral part layer 6a	1.09981	0.696012	0.761242	0.74382	0.804915	0.82116	0.143627	0.752037	0.730137	0.748252	0.686169	0.70047	0.723413	0.0260577	1.13512	0.947	0.247438	0.0771399
Primary visual area layer 4	1.30155	0.783056	0.807326	0.830867	0.912783	0.927115	0.192234	0.791636	0.805915	0.747569	0.819989	0.81858	0.796738	0.0266291	1.16364	0.95	0.247786	0.0772443
Pyramus (VIII) granular layer	0.588819	0.66017	0.733592	0.775908	0.991295	0.749957	0.136538	0.595349	0.714094	0.583377	0.647252	0.729485	0.653911	0.0596362	1.14688	0.912	0.249113	0.0773486
Pyramus (VIII)	1.08104	1.22886	1.35999	1.44258	1.86346	1.39519	0.264241	1.10774	1.31657	1.07595	1.20131	1.35383	1.21108	0.110035	1.15202	0.91	0.251195	0.077453
Prelimbic area	1.70536	1.59001	1.4368	1.69211	1.64601	1.61406	0.0974141	1.57235	1.59715	1.59106	1.51367	1.4361	1.54207	0.0606418	1.04669	0.887	0.251575	0.0775574
Lateral visual area layer 6b	0.0853361	0.0392552	0.0518874	0.045742	0.0508619	0.0546165	0.0159998	0.0440367	0.0477883	0.0406213	0.0395998	0.0471076	0.0438307	0.00330586	1.24608	0.934	0.252037	0.0776618
Anteromedial visual area layer 2/3	0.567997	0.348518	0.357067	0.373788	0.42328	0.41413	0.0811756	0.370045	0.371383	0.357058	0.348888	0.351259	0.359727	0.00936629	1.15123	0.942	0.252116	0.0777662
Subiculum dorsal part pyramidal layer	1.80742	0.76394	0.932948	0.907331	0.979006	1.07813	0.371659	0.849669	0.842781	0.821984	0.7681	0.865005	0.829508	0.0336756	1.29972	0.942	0.252493	0.0778706
Retrosplenial area ventral part layer 2	0.542396	0.367633	0.380621	0.393928	0.412357	0.419387	0.0632614	0.373117	0.388451	0.408603	0.348205	0.362524	0.37618	0.0208818	1.11486	0.917	0.252725	0.0779749
Visual areas	20.9394	11.823	13.0285	12.9399	14.5578	14.6577	3.25917	12.4487	12.8134	11.915	12.5422	12.6743	12.4787	0.307562	1.17461	0.941	0.252771	0.0780793
Ventral auditory area layer 6b	0.204465	0.148828	0.157369	0.159414	0.168288	0.167673	0.019409	0.156006	0.158043	0.158389	0.145086	0.155319	0.154568	0.00488308	1.08478	0.926	0.253153	0.0781837
Retrosplenial area ventral part	6.38007	4.27506	4.4432	4.52368	4.81277	4.88695	0.766575	4.44088	4.45626	4.6776	4.09039	4.1779	4.3686	0.210787	1.11865	0.922	0.253653	0.0782881
Pyramus (VIII) molecular layer	0.492218	0.568688	0.626403	0.666673	0.872162	0.645229	0.127737	0.512396	0.602474	0.492576	0.554056	0.624347	0.55717	0.0505013	1.15805	0.907	0.25376	0.0783925
Superior colliculus superficial gray layer	2.21976	1.08788	1.18146	1.19988	1.25175	1.38815	0.419169	1.15622	1.07933	1.22308	1.03574	1.04763	1.1084	0.0710699	1.25239	0.931	0.254973	0.0784969
Postsubiculum layer 1	0.61442	0.26318	0.327368	0.327704	0.347841	0.376103	0.122526	0.293237	0.315744	0.290494	0.266275	0.308589	0.294868	0.0171082	1.2755	0.929	0.256908	0.0786013
Retrosplenial area ventral part layer 6b	0.0996725	0.0631496	0.0652006	0.0662235	0.0703191	0.0729131	0.013582	0.0675912	0.0634902	0.0669057	0.0580342	0.0631515	0.0638346	0.00339922	1.14222	0.917	0.257199	0.0787056
Taenia tecta ventral part layer 2	0.169989	0.139953	0.156003	0.149174	0.16385	0.155794	0.0105945	0.151227	0.147802	0.152927	0.144061	0.147467	0.148697	0.00310151	1.04773	0.909	0.258448	0.07881
Anteromedial visual area layer 5	0.714092	0.419177	0.441384	0.435573	0.506571	0.503359	0.109491	0.445829	0.447503	0.403824	0.422967	0.435233	0.431071	0.0162063	1.16769	0.924	0.258795	0.0789144
Lateral visual area	1.34968	0.763599	0.917928	0.903235	1.00017	0.986921	0.196674	0.83499	0.918218	0.816181	0.849689	0.866712	0.857158	0.0347732	1.15139	0.919	0.259808	0.0790188
posteromedial visual area layer 1	0.484367	0.240651	0.258413	0.247826	0.302441	0.30674	0.0913718	0.249883	0.250206	0.246459	0.244768	0.243048	0.246873	0.0028071	1.2425	0.926	0.260305	0.0791232
Spinal vestibular nucleus	0.532497	0.539332	0.59295	0.618542	0.679638	0.592592	0.054219	0.579646	0.56083	0.555386	0.554397	0.532521	0.556556	0.0150672	1.06475	0.906	0.26088	0.0792276
dorsal hippocampal commissure	1.42614	0.624328	0.789575	0.732555	0.847585	0.884036	0.280898	0.698101	0.719555	0.706948	0.659542	0.716855	0.7002	0.0217027	1.26255	0.923	0.261128	0.0793319
Interanteromedial nucleus of the thalamus	0.0696342	0.0307215	0.0361846	0.0320877	0.0375491	0.0412354	0.0144209	0.0358438	0.0365239	0.0296979	0.0276516	0.0286742	0.0316783	0.00374145	1.30169	0.907	0.261136	0.0794363
Oculomotor nucleus	0.0682688	0.0402792	0.0518874	0.0484729	0.051886	0.0521589	0.00910375	0.0488159	0.0488123	0.0440349	0.0457446	0.0433527	0.0461521	0.00230902	1.13015	0.904	0.262673	0.0795407
Primary visual area layer 5	2.82462	1.56987	1.74198	1.69792	1.91398	1.94967	0.451128	1.6396	1.68863	1.54941	1.69357	1.70646	1.65554	0.0577084	1.17767	0.915	0.263439	0.0796451
Medial preoptic nucleus central part	0.00819226	0.00580294	0.00614456	0.0081926	0.00580304	0.00682708	0.00112176	0.00682739	0.0068269	0.0030722	0.00546204	0.00648583	0.00573487	0.00142227	1.19045	0.853	0.264102	0.0797495
Retrosplenial area ventral part layer 2/3	1.21519	0.796368	0.832246	0.850665	0.897764	0.918446	0.151927	0.830211	0.838002	0.884453	0.757859	0.780007	0.818106	0.0447785	1.12265	0.896	0.264425	0.0798539
Pontine gray	0.99297	0.957144	0.706282	0.969458	0.926438	0.910458	0.104319	0.864007	0.907636	0.832567	0.758541	0.833259	0.839202	0.0487524	1.08491	0.875	0.264653	0.0799582
Mediodorsal nucleus of the thalamus central part	0.425656	0.188766	0.230421	0.177165	0.213688	0.247139	0.0911818	0.195605	0.185692	0.163509	0.18844	0.20584	0.187817	0.0140088	1.31585	0.909	0.2649	0.0800626
Primary visual area	10.3048	5.69644	6.2415	6.24823	7.01416	7.10103	1.65595	6.00025	6.14762	5.68255	6.11373	6.18783	6.0264	0.18292	1.17832	0.912	0.26502	0.080167
Retrosplenial area ventral part layer 5	2.1177	1.47224	1.49449	1.53133	1.64533	1.65222	0.240251	1.51875	1.51762	1.60779	1.41569	1.40777	1.49352	0.0744105	1.10626	0.892	0.265264	0.0802714
Primary visual area layer 2/3	2.64781	1.54426	1.62626	1.69177	1.89623	1.88127	0.400578	1.62526	1.67873	1.53678	1.64237	1.6259	1.62181	0.0467358	1.15998	0.91	0.265912	0.0803758
Dorsal premammillary nucleus	0.139951	0.0983086	0.0774897	0.0955804	0.0972862	0.101723	0.0205802	0.107873	0.0901151	0.0870457	0.0788583	0.0720269	0.0871837	0.0121301	1.16677	0.861	0.265973	0.0804802
Cortical amygdalar area anterior part layer 1	0.394935	0.319503	0.290842	0.342383	0.369688	0.34347	0.0365549	0.315426	0.325302	0.354669	0.295292	0.297666	0.317671	0.0216016	1.08121	0.859	0.266632	0.0805846
Paraventricular hypothalamic nucleus descending division forniceal part	0.00546151	0.00375484	0.00375501	0.00443766	0.00443762	0.00436933	0.000625647	0.00546191	0.00512017	0.00512034	0.00443791	0.00409632	0.00484733	0.000501665	0.901388	0.843	0.268927	0.0806889
Retrosplenial area lateral agranular part layer 1	0.253619	0.165554	0.159758	0.173751	0.176139	0.185764	0.0344265	0.167612	0.167259	0.165558	0.160789	0.157708	0.163785	0.00389269	1.1342	0.897	0.271731	0.0807933
posteromedial visual area layer 2/3	0.8735	0.422249	0.485078	0.468002	0.547534	0.559273	0.162165	0.461873	0.478907	0.457758	0.447888	0.433185	0.455922	0.0151565	1.22668	0.897	0.272127	0.0808977
Lateral visual area layer 5	0.399714	0.223584	0.263875	0.267625	0.295272	0.290014	0.0594294	0.244421	0.27922	0.231098	0.254668	0.248851	0.251652	0.0158222	1.15244	0.882	0.272372	0.0810021
Preparasubthalamic nucleus	0.0174086	0.0153607	0.011265	0.013313	0.0143369	0.0143368	0.00204784	0.0143375	0.0143365	0.0133129	0.0116068	0.0105821	0.0128352	0.00150493	1.117	0.836	0.274136	0.0811065
Nucleus prepositus	0.330763	0.429418	0.432508	0.456055	0.489845	0.427718	0.0530827	0.412375	0.399715	0.383684	0.381319	0.391881	0.393795	0.0113296	1.08614	0.884	0.274156	0.0812109
Postpiriform transition area layers 1	0.403469	0.352955	0.356726	0.396317	0.43591	0.389075	0.0309978	0.397013	0.367287	0.378563	0.365274	0.31883	0.365394	0.0258651	1.06481	0.83	0.275503	0.0813152
Postsubiculum layer 2	0.791577	0.337253	0.407589	0.403486	0.426694	0.47332	0.161971	0.364583	0.389133	0.37515	0.351619	0.380616	0.37222	0.013022	1.27161	0.88	0.2805	0.0814196
Flocculus molecular layer	0.671083	0.707276	0.820298	0.851689	1.00119	0.810308	0.116832	0.648261	0.770757	0.738694	0.7285	0.786151	0.734473	0.0479023	1.10325	0.849	0.280533	0.081524
Dorsal nucleus raphe	0.200028	0.124593	0.148493	0.137567	0.154975	0.153131	0.0256159	0.146106	0.14473	0.138249	0.131772	0.123914	0.136954	0.00828033	1.11812	0.85	0.285058	0.0816284
Anteromedial visual area	2.58875	1.4934	1.57198	1.56137	1.80577	1.80426	0.406205	1.6	1.5951	1.49923	1.52493	1.55216	1.55429	0.039122	1.16083	0.866	0.286613	0.0817328
Retrosplenial area	11.9392	7.77901	8.0876	8.23732	8.81584	8.97179	1.52143	8.19458	8.14722	8.4902	7.64754	7.66284	8.02848	0.326704	1.1175	0.857	0.286827	0.0818372
Lateral visual area layer 4	0.142341	0.084996	0.102751	0.0948977	0.115719	0.108141	0.0198352	0.0914871	0.103428	0.0945555	0.0928547	0.0969461	0.0958542	0.00420244	1.12818	0.857	0.287104	0.0819415
lateral olfactory tract body	0.799428	0.716151	0.741102	0.776591	0.841099	0.774874	0.0437734	0.7476	0.737646	0.781022	0.734303	0.735971	0.747308	0.0174797	1.03689	0.827	0.292538	0.0820459
Postsubiculum	2.08698	0.861566	1.05925	1.04012	1.10019	1.22962	0.436398	0.953104	1.01345	0.965354	0.902944	0.99677	0.966325	0.0383167	1.27247	0.85	0.294705	0.0821503
Primary visual area layer 6a	1.7866	0.869076	1.03058	0.986867	1.11384	1.15739	0.32437	0.947301	0.969078	0.890597	0.97634	1.02681	0.962025	0.0442052	1.20308	0.844	0.296406	0.0822547
lateral olfactory tract general	0.813423	0.727757	0.753732	0.791269	0.855777	0.788392	0.0448409	0.760913	0.750618	0.792969	0.747276	0.750991	0.760553	0.0168367	1.0366	0.822	0.296503	0.0823591
Anterior cingulate area ventral part 6a	0.371041	0.24543	0.289477	0.274452	0.310633	0.298207	0.0421548	0.278558	0.242014	0.311658	0.269347	0.251582	0.270632	0.0242054	1.10189	0.802	0.297392	0.0824635
Primary auditory area layer 6b	0.214706	0.136881	0.158734	0.160438	0.165216	0.167195	0.0256801	0.155665	0.154288	0.156682	0.141672	0.150198	0.151701	0.0054783	1.10214	0.834	0.298253	0.0825678
Primary visual area layer 6b	0.415416	0.18467	0.232128	0.221542	0.238949	0.258541	0.0806438	0.211308	0.20822	0.192183	0.209947	0.229735	0.210279	0.0119281	1.22951	0.837	0.299399	0.0826722
Medullary reticular nucleus ventral part	0.410637	1.07354	0.618211	1.09166	1.00836	0.840484	0.275596	1.07839	1.00526	1.05718	0.964392	0.924743	1.00599	0.0569096	0.835477	0.832	0.299939	0.0827766
Posterolateral visual area layer 5	0.336565	0.16692	0.200722	0.189795	0.217443	0.222289	0.0594463	0.188777	0.188764	0.164533	0.193561	0.200719	0.187271	0.0121813	1.18699	0.816	0.308063	0.082881
Entorhinal area medial part ventral zone	0.277513	0.277176	0.233834	0.288448	0.308926	0.277179	0.0245509	0.269682	0.277172	0.276498	0.252961	0.222225	0.259708	0.020673	1.06727	0.77	0.308863	0.0829854
Retrosplenial area dorsal part layer 1	0.801135	0.497005	0.527408	0.509307	0.580986	0.583168	0.112697	0.532878	0.514407	0.551631	0.492267	0.493606	0.516958	0.0228785	1.12808	0.814	0.309115	0.0830898
Cortical amygdalar area posterior part medial zone layer 1	0.260104	0.246796	0.197308	0.263187	0.260113	0.245502	0.0247538	0.239983	0.244744	0.234511	0.220189	0.21096	0.230077	0.0126186	1.06704	0.785	0.309743	0.0831942
Anteromedial visual area layer 4	0.245768	0.145074	0.149859	0.14576	0.17375	0.172042	0.0383368	0.152251	0.155653	0.139614	0.149182	0.151905	0.149721	0.00545517	1.14908	0.815	0.310856	0.0832985
Entorhinal area medial part ventral zone layer 2	0.105475	0.111963	0.0914856	0.115038	0.124936	0.109779	0.0110935	0.106166	0.109572	0.108551	0.0993409	0.0884121	0.102408	0.00785456	1.07198	0.767	0.313062	0.0834029
Primary somatosensory area trunk layer 6b	0.332128	0.178867	0.214035	0.197988	0.220857	0.228775	0.0536664	0.206529	0.19286	0.202083	0.189806	0.197989	0.197853	0.00604747	1.15629	0.81	0.314548	0.0835073
posteromedial visual area	2.72598	1.32102	1.51634	1.43234	1.69585	1.73831	0.508783	1.43751	1.50567	1.41594	1.4372	1.43303	1.44587	0.0309256	1.20226	0.811	0.314731	0.0836117
Anteromedial visual area layer 1	0.366262	0.230752	0.2352	0.239975	0.27206	0.26885	0.0508272	0.245103	0.239965	0.239632	0.241354	0.232125	0.239636	0.00422788	1.12191	0.81	0.315037	0.0837161
Lateral visual area layer 2/3	0.309258	0.18979	0.23281	0.225979	0.248848	0.241337	0.0390776	0.212332	0.231432	0.21403	0.213361	0.222566	0.218744	0.00731991	1.10328	0.804	0.315327	0.0838205
Nucleus of the lateral olfactory tract layer 3	0.122884	0.09865	0.0795379	0.104797	0.10821	0.102816	0.0141065	0.0945594	0.0962593	0.104796	0.0863686	0.0894362	0.0942839	0.00633465	1.09049	0.78	0.315355	0.0839248
Anterior olfactory nucleus external part	0.358411	0.341008	0.338292	0.362523	0.365591	0.353165	0.0113005	0.352635	0.342028	0.355693	0.320895	0.349552	0.34416	0.0124876	1.02616	0.756	0.316422	0.0840292
Taenia tecta ventral part layer 1	0.240306	0.173064	0.2253	0.21608	0.210957	0.213142	0.0223847	0.197653	0.212317	0.190818	0.182296	0.21335	0.199287	0.0120883	1.06952	0.77	0.316881	0.0841336
Posterolateral visual area layer 2/3	0.334517	0.174088	0.199698	0.196622	0.227342	0.226454	0.0566153	0.185705	0.196615	0.181601	0.199023	0.207547	0.194098	0.00936021	1.1667	0.797	0.319474	0.084238
Anteromedial visual area layer 6a	0.5028	0.257719	0.289818	0.270356	0.31746	0.327631	0.0898728	0.281971	0.283316	0.270354	0.265592	0.281963	0.276639	0.00725134	1.18432	0.8	0.320491	0.0843424
Retrosplenial area lateral agranular part layer 5	0.366262	0.246113	0.230762	0.260115	0.282301	0.277111	0.0476924	0.254662	0.254302	0.249531	0.253302	0.238269	0.250013	0.00614784	1.10838	0.797	0.320883	0.0844468
Accessory olfactory bulb granular layer	0.206172	0.187059	0.191847	0.207546	0.214712	0.201467	0.0103408	0.206187	0.195249	0.20891	0.209947	0.223249	0.208709	0.00895	0.965304	0.749	0.32115	0.0845511
Cortical amygdalar area posterior part lateral zone layer 1	0.305162	0.293561	0.254316	0.305857	0.329066	0.297592	0.0245165	0.290847	0.264884	0.305172	0.285733	0.263188	0.281965	0.0159749	1.05542	0.755	0.321514	0.0846555
Posterolateral visual area layer 1	0.15224	0.0836306	0.0979715	0.100018	0.111282	0.109028	0.0233271	0.0914871	0.0983073	0.092166	0.0955858	0.101384	0.095786	0.00372338	1.13825	0.793	0.322147	0.0847599
Fasciola cinerea	0.120153	0.0621256	0.0747588	0.0587137	0.0696364	0.0770775	0.0222578	0.0587156	0.0757786	0.0641749	0.0631549	0.0597379	0.0643124	0.00608411	1.19849	0.782	0.323078	0.0848643
Retrosplenial area dorsal part	4.26953	2.67618	2.84117	2.83874	3.07971	3.14107	0.578733	2.89072	2.82634	2.97048	2.71395	2.6626	2.81282	0.112646	1.1167	0.787	0.323811	0.0849687
Retrosplenial area dorsal part layer 2/3	1.16979	0.730829	0.776945	0.76396	0.84383	0.85707	0.16062	0.796415	0.761199	0.818571	0.724062	0.72812	0.765674	0.0371618	1.11937	0.784	0.324103	0.0850731
Nucleus of the lateral olfactory tract	0.624319	0.492909	0.41783	0.504869	0.537634	0.515512	0.0670735	0.475869	0.488806	0.515106	0.450277	0.454008	0.476813	0.0238128	1.08116	0.769	0.326537	0.0851775
Paraventricular hypothalamic nucleus descending division medial parvicellular part ventral zone	0.00341344	0.00238945	0.00238955	0.00136543	0.00204813	0.0023212	0.000661873	0.00238959	0.00170672	0.00204813	0.00238964	0.000682719	0.00184336	0.000633163	1.25922	0.738	0.327336	0.0852818
Retrosplenial area dorsal part layer 6a	0.795673	0.477548	0.515801	0.527399	0.547875	0.572859	0.113734	0.510006	0.527378	0.521933	0.504215	0.482682	0.509243	0.0156284	1.12492	0.784	0.32779	0.0853862
Cochlear nuclei	1.45379	1.59308	1.67951	1.85836	2.00751	1.71845	0.195146	1.50476	1.7098	1.65626	1.59219	1.56821	1.60624	0.0709487	1.06986	0.764	0.328788	0.0854906
Posterolateral visual area layer 6a	0.245085	0.104112	0.13006	0.120841	0.145417	0.149103	0.0498232	0.1147	0.130052	0.104796	0.124603	0.132106	0.121252	0.0102001	1.2297	0.774	0.33048	0.085595
posteromedial visual area layer 4	0.224263	0.116059	0.129036	0.126303	0.1461	0.148352	0.0391656	0.126307	0.132442	0.120499	0.125968	0.12801	0.126645	0.00384232	1.1714	0.78	0.33077	0.0856994
Retrosplenial area dorsal part layer 5	1.40804	0.915841	0.962988	0.976968	1.0384	1.06045	0.178151	0.989972	0.959179	1.0169	0.935034	0.902896	0.960796	0.0400436	1.10372	0.772	0.331139	0.0858038
Posterolateral visual area	1.24795	0.615112	0.734957	0.708319	0.823007	0.82587	0.221209	0.685129	0.720238	0.633898	0.720307	0.753722	0.702659	0.040653	1.17535	0.775	0.331153	0.0859081
Anteromedial visual area layer 6b	0.191835	0.0921644	0.0986542	0.0959217	0.112647	0.118245	0.0374412	0.1048	0.0972833	0.0887525	0.0969513	0.099677	0.0974929	0.00519429	1.21285	0.776	0.331743	0.0860125
posteromedial visual area layer 6b	0.0372065	0.0187742	0.0197991	0.0177506	0.0194572	0.0225975	0.00733792	0.0170685	0.0211634	0.0191159	0.018093	0.0174093	0.01857	0.00147329	1.21688	0.761	0.338187	0.0861169
Retrosplenial area lateral agranular part	1.2896	0.827772	0.80323	0.874902	0.923365	0.943774	0.177743	0.862982	0.864627	0.842124	0.843203	0.822335	0.847054	0.0155735	1.11418	0.767	0.338419	0.0862213
Postsubiculum layer 3	0.680982	0.261132	0.324296	0.308929	0.325653	0.380198	0.152202	0.295285	0.308576	0.29971	0.28505	0.307565	0.299237	0.00864492	1.27056	0.751	0.347682	0.0863257
Spinal nucleus of the trigeminal oral part caudal dorsomedial part	0.0153605	0.0436927	0.0334537	0.0512038	0.0491551	0.0385732	0.0131359	0.0488159	0.0440335	0.0471071	0.0409653	0.0471076	0.0456059	0.00278639	0.845794	0.741	0.349454	0.0864301
supramammillary decussation	0.0443748	0.028332	0.0218473	0.0300395	0.0324287	0.0314045	0.00737455	0.0320887	0.0269662	0.0303807	0.0242378	0.0225297	0.0272406	0.0035958	1.15285	0.718	0.350554	0.0865344
Retrochiasmatic area	0.336907	0.274445	0.24271	0.316781	0.320191	0.298207	0.0345558	0.307915	0.239283	0.308586	0.264909	0.260799	0.276298	0.0275035	1.07929	0.702	0.351609	0.0866388
Retrosplenial area lateral agranular part layer 2/3	0.328373	0.210613	0.204136	0.222224	0.240655	0.2412	0.0453186	0.222232	0.226653	0.207203	0.217799	0.212326	0.217242	0.00690982	1.11028	0.739	0.352479	0.0867432
Medullary reticular nucleus	0.637972	1.58181	1.00737	1.63203	1.56887	1.28561	0.396191	1.59488	1.51113	1.55522	1.41399	1.39855	1.49475	0.0771072	0.860082	0.733	0.354745	0.0868476
Posterolateral visual area layer 4	0.147119	0.0737315	0.0884133	0.0829501	0.0986516	0.0981732	0.0257696	0.0846597	0.0860189	0.0744155	0.0877341	0.0901189	0.0845894	0.00540408	1.16058	0.73	0.356065	0.086952
Perihypoglossal nuclei	0.343734	0.46287	0.454697	0.490532	0.526711	0.455709	0.0613917	0.44105	0.430436	0.416113	0.412726	0.42192	0.424449	0.0102445	1.07365	0.71	0.369183	0.0870564
Retrosplenial area dorsal part layer 6b	0.0948937	0.0549573	0.0580319	0.0611032	0.0686124	0.0675197	0.014419	0.0614465	0.0641728	0.061444	0.0583756	0.0553003	0.0601479	0.00303998	1.12256	0.707	0.36936	0.0871608
posteromedial visual area layer 5	0.638314	0.294926	0.348191	0.316781	0.386073	0.396857	0.12457	0.327373	0.346806	0.327701	0.335574	0.334191	0.334329	0.00706484	1.18702	0.709	0.372584	0.0872651
Periventricular hypothalamic nucleus posterior part	0.169648	0.152242	0.0983129	0.161804	0.137907	0.143983	0.0251681	0.143717	0.140634	0.146442	0.114362	0.101042	0.129239	0.0181756	1.11408	0.672	0.372661	0.0873695
Agranular insular area ventral part layer 6b	0.000341344	0.000341349	0.000341364	0.000341358	0.000341355	0.000341354	6.93199e-09	0.00034137	0	0.000341356	0.000341378	0.00034136	0.000273093	0.000136546	1.24996	0.707	0.373973	0.0874739
Principal sensory nucleus of the trigeminal	0.99024	1.18414	1.07905	1.3726	1.3463	1.19447	0.148272	1.14291	1.13565	1.11043	1.09685	1.11659	1.12048	0.0167802	1.06603	0.701	0.376213	0.0875783
Ventromedial hypothalamic nucleus	0.534204	0.434879	0.332489	0.462199	0.458781	0.44451	0.06512	0.470066	0.379234	0.442397	0.390536	0.364913	0.409429	0.0400351	1.08568	0.649	0.390793	0.0876827
posteromedial visual area layer 6a	0.468324	0.228363	0.275822	0.255677	0.294248	0.304487	0.0847897	0.255003	0.276148	0.244411	0.264909	0.277184	0.263531	0.0125364	1.15541	0.676	0.39124	0.0877871
Gigantocellular reticular nucleus	1.01345	3.09706	1.4071	3.30742	2.77283	2.31957	0.929982	2.84839	2.81439	2.92337	2.57638	2.6312	2.75874	0.132483	0.840807	0.661	0.400777	0.0878914
Main olfactory bulb granule layer	5.23451	5.07109	5.08462	5.26921	5.5675	5.24539	0.17926	5.42914	5.00924	5.33334	5.36987	5.73723	5.37576	0.232243	0.975747	0.628	0.40165	0.0879958
Piriform-amygdalar area molecular layer	0.313013	0.298681	0.304497	0.308929	0.347158	0.314456	0.01703	0.335908	0.286047	0.307903	0.305192	0.279915	0.302993	0.0196575	1.03783	0.623	0.404277	0.0881002
Retrosplenial area lateral agranular part layer 6a	0.288777	0.176819	0.17512	0.188771	0.193548	0.204607	0.04266	0.188777	0.186033	0.187746	0.181272	0.180238	0.184813	0.00344322	1.1071	0.654	0.406698	0.0882046
Intermediate reticular nucleus	0.971124	2.97793	1.62114	3.21457	2.90596	2.33814	0.881216	2.846	2.80551	2.91211	2.58218	2.59467	2.74809	0.134794	0.850824	0.65	0.407588	0.088309
Spinal nucleus of the trigeminal oral part middle dorsomedial part dorsal zone	0.0232114	0.0570054	0.047791	0.0696371	0.0669056	0.0529101	0.0167371	0.062812	0.0638315	0.0648576	0.0573515	0.0549589	0.0607623	0.00389117	0.870772	0.646	0.407738	0.0884134
Superior olivary complex medial part	0.0279902	0.0532505	0.03004	0.06281	0.0477897	0.0443761	0.0134479	0.0494986	0.0542738	0.0501793	0.0494998	0.0494971	0.0505897	0.00186083	0.877176	0.647	0.409997	0.0885177
Paraventricular hypothalamic nucleus descending division lateral parvicellular part	0.0365238	0.0221877	0.0184337	0.0235537	0.0235535	0.0248505	0.0061302	0.0259441	0.0228701	0.0235535	0.0201413	0.0163853	0.0217789	0.00326993	1.14104	0.625	0.410049	0.0886221
Parabrachial nucleus lateral division dorsal lateral part	0.0870428	0.0740728	0.085341	0.0836328	0.0914832	0.0843145	0.0057488	0.0815873	0.0819228	0.0829494	0.0850031	0.0757818	0.0814489	0.00307386	1.03518	0.622	0.412526	0.0887265
Entorhinal area medial part ventral zone layer 1	0.127321	0.122886	0.105482	0.130058	0.138932	0.124936	0.0110497	0.123234	0.125615	0.126643	0.11641	0.102408	0.118862	0.00896677	1.0511	0.604	0.419161	0.0888309
Linear nucleus of the medulla	0.0116057	0.0355003	0.01502	0.0392562	0.0331114	0.0268987	0.0113161	0.0290164	0.0337931	0.0341356	0.0320895	0.0307224	0.0319514	0.00191344	0.841864	0.623	0.425793	0.0889353
Spinal nucleus of the trigeminal interpolar part	0.744472	1.99485	1.6464	2.44174	2.25875	1.81724	0.599414	2.14926	2.17573	2.15225	1.91137	2.0287	2.08346	0.100188	0.872221	0.62	0.427973	0.0890397
Arcuate hypothalamic nucleus	0.268979	0.247137	0.192529	0.252605	0.262843	0.244819	0.0272353	0.246469	0.228018	0.26182	0.211313	0.204474	0.230419	0.0213894	1.06249	0.588	0.431048	0.0891441
Retrosplenial area lateral agranular part layer 6b	0.052567	0.0286734	0.0334537	0.0300395	0.030722	0.0350911	0.00887563	0.0296992	0.0303797	0.0320874	0.0300412	0.0337946	0.0312004	0.00153542	1.1247	0.611	0.433799	0.0892484
Prelimbic area layer 2/3	0.38094	0.350225	0.331806	0.373788	0.371394	0.361631	0.0180864	0.350587	0.36558	0.363544	0.349912	0.334532	0.352831	0.0111867	1.02494	0.585	0.436533	0.0893528
Basolateral amygdalar nucleus ventral part	0.288095	0.293219	0.217449	0.294251	0.288445	0.276292	0.0295247	0.272754	0.286388	0.243728	0.262861	0.24612	0.26237	0.016103	1.05306	0.585	0.438492	0.0894572
Major island of Calleja	0.0501776	0.0303801	0.0399396	0.0389149	0.0337942	0.0386413	0.00673185	0.0372093	0.0354999	0.0365251	0.0337964	0.0358428	0.0357747	0.00115021	1.08013	0.594	0.445996	0.0895616
Paraflocculus molecular layer	2.47133	2.62498	3.00298	3.22447	3.58218	2.98119	0.401919	2.58383	3.05265	2.90084	2.75219	2.72815	2.80353	0.160073	1.06337	0.581	0.447227	0.089666
Accessory olfactory bulb	0.869404	0.776911	0.789917	0.869781	0.89435	0.840073	0.0473159	0.860252	0.829127	0.845197	0.882461	0.890266	0.86146	0.0227254	0.975173	0.576	0.447534	0.0897704
Accessory olfactory bulb glomerular layer	0.154629	0.143708	0.143032	0.158049	0.159754	0.151834	0.00710886	0.151227	0.150192	0.156341	0.160789	0.157025	0.155115	0.00391669	0.978852	0.572	0.448686	0.0898747
Paragigantocellular reticular nucleus	0.315743	0.884436	0.549255	0.966727	0.883086	0.71985	0.247826	0.846938	0.842781	0.894693	0.799848	0.741433	0.825139	0.051518	0.872398	0.588	0.448741	0.0899791
Paragigantocellular reticular nucleus lateral part	0.196956	0.61716	0.369356	0.689203	0.630483	0.500631	0.187324	0.604224	0.604863	0.634239	0.556446	0.503164	0.580587	0.0460515	0.862285	0.586	0.448995	0.0900835
corpus callosum posterior forceps	0.77963	0.349542	0.429436	0.415775	0.451271	0.485131	0.151111	0.428078	0.433508	0.419526	0.403508	0.424651	0.421854	0.0102406	1.15	0.591	0.450003	0.0901879
Paragigantocellular reticular nucleus dorsal part	0.118788	0.267277	0.179899	0.277524	0.252603	0.219218	0.0607553	0.242714	0.237917	0.260454	0.243402	0.238269	0.244551	0.0082593	0.896409	0.584	0.453496	0.0902923
Abducens nucleus	0.0139951	0.013654	0.0116064	0.0191161	0.0146783	0.01461	0.0024748	0.0146789	0.0133125	0.0150197	0.012631	0.0119476	0.0135179	0.00117455	1.08079	0.564	0.457114	0.0903967
Postpiriform transition area layers 2	0.256008	0.231435	0.217449	0.244071	0.275474	0.244887	0.0199684	0.254662	0.230749	0.243728	0.234868	0.212667	0.235335	0.0139932	1.04059	0.554	0.458424	0.090501
Nucleus raphe magnus	0.0583699	0.126641	0.0638351	0.134495	0.11333	0.0993341	0.0319878	0.119479	0.121177	0.116402	0.0969513	0.109576	0.112717	0.00882396	0.881267	0.57	0.459481	0.0906054
Nucleus raphe pallidus	0.0204807	0.0460822	0.0355019	0.0512038	0.0481311	0.0402799	0.0112203	0.0460849	0.0453989	0.0467657	0.0409653	0.0450595	0.0448549	0.00203129	0.898005	0.567	0.46467	0.0907098
Paraflocculus	4.40505	4.78094	5.4352	5.87853	6.56392	5.41273	0.769063	4.66174	5.52194	5.24322	5.01347	5.00672	5.08942	0.28504	1.06353	0.557	0.465667	0.0908142
Parvicellular reticular nucleus	0.697708	1.69343	1.18761	1.90273	1.83751	1.4638	0.457873	1.73825	1.6842	1.68186	1.56556	1.56377	1.64673	0.0699799	0.888914	0.559	0.471942	0.0909186
Facial motor nucleus	0.315743	0.805585	0.396324	0.87456	0.733913	0.625225	0.225693	0.729507	0.744473	0.759858	0.683097	0.657459	0.714879	0.038523	0.874589	0.554	0.475045	0.091023
Nucleus ambiguus	0.0498363	0.156338	0.0843169	0.173751	0.156682	0.124185	0.0482989	0.158737	0.148826	0.156682	0.132455	0.121524	0.143645	0.0144163	0.864528	0.546	0.47698	0.0911273
Medulla behavioral state related	0.105475	0.231776	0.13518	0.245437	0.217102	0.186994	0.0559597	0.223938	0.218119	0.220174	0.18332	0.200378	0.209186	0.0152632	0.893913	0.541	0.48161	0.0912317
Perireunensis nucleus	0.0436921	0.0201396	0.0221887	0.0259432	0.030722	0.0285371	0.00839041	0.0337956	0.0242355	0.0218468	0.0218482	0.0232125	0.0249877	0.00449485	1.14205	0.527	0.48344	0.0913361
Nucleus ambiguus ventral division	0.0300383	0.0846547	0.0474496	0.095239	0.0849974	0.0684758	0.0251815	0.087732	0.0785093	0.0849976	0.0737376	0.0672478	0.0784449	0.00743942	0.872916	0.537	0.484023	0.0914405
Paraflocculus granular layer	1.93372	2.15596	2.43222	2.65406	2.98174	2.43154	0.367697	2.07792	2.46929	2.34238	2.26129	2.27858	2.28589	0.127073	1.06372	0.529	0.488079	0.0915449
Spinal nucleus of the trigeminal oral part ventrolateral part	0.187398	0.431466	0.28777	0.510672	0.446492	0.37276	0.117886	0.434564	0.437604	0.433863	0.391219	0.392905	0.418031	0.0212476	0.891704	0.534	0.48938	0.0916493
Spinal nucleus of the trigeminal oral part	0.318133	0.689867	0.509315	0.837011	0.750298	0.620925	0.185647	0.72029	0.720921	0.708313	0.649642	0.659507	0.691734	0.0308302	0.897635	0.532	0.491533	0.0917537
Superior olivary complex lateral part	0.0447161	0.0791931	0.0419878	0.081926	0.0689537	0.0633553	0.0169177	0.0652016	0.0706584	0.0805599	0.0662273	0.0672478	0.069979	0.00559957	0.905348	0.526	0.491557	0.091858
Main olfactory bulb	19.4334	18.8606	18.6614	19.8036	20.8131	19.5144	0.765764	20.1807	19.3164	19.6792	19.3175	20.753	19.8494	0.551758	0.983125	0.502	0.499973	0.0919624
motor root of the trigeminal nerve	0.16009	0.152242	0.161807	0.182968	0.180918	0.167605	0.0121605	0.165906	0.163163	0.160096	0.158058	0.16829	0.163103	0.0037219	1.02761	0.501	0.512149	0.0920668
Inferior salivatory nucleus	0.0256008	0.0474476	0.0382328	0.0580309	0.0508619	0.0440348	0.0112038	0.0532537	0.049495	0.0488139	0.046086	0.0430113	0.048132	0.003434	0.914876	0.494	0.517157	0.0921712
Nucleus ambiguus dorsal division	0.00716823	0.0358417	0.0129718	0.0365254	0.0378904	0.0260795	0.0132164	0.0324301	0.0334518	0.0341356	0.0286757	0.025602	0.030859	0.00323512	0.845117	0.497	0.517165	0.0922756
Main olfactory bulb glomerular layer	4.56446	4.43686	4.33089	4.65613	4.908	4.57927	0.198074	4.73002	4.64878	4.59226	4.47751	4.84765	4.65924	0.125003	0.982835	0.483	0.517411	0.09238
Nucleus of the lateral olfactory tract pyramidal layer	0.21573	0.156338	0.13757	0.160438	0.176481	0.169311	0.0263082	0.156689	0.167942	0.174091	0.148499	0.150881	0.15962	0.00987224	1.06071	0.488	0.520447	0.0924843
Spinal nucleus of the trigeminal oral part middle dorsomedial part ventral zone	0.030721	0.0675872	0.0546183	0.0911427	0.0822666	0.0652671	0.0213108	0.0757841	0.0774853	0.0740742	0.0727135	0.0641756	0.0728465	0.00462292	0.895954	0.492	0.522122	0.0925887
Medullary reticular nucleus dorsal part	0.227335	0.508269	0.389155	0.54037	0.560505	0.445127	0.124046	0.516492	0.505873	0.498038	0.449594	0.473807	0.488761	0.0241062	0.910725	0.488	0.525285	0.0926931
Entorhinal area medial part dorsal zone layer 2a	0.0150191	0.0201396	0.0167268	0.0215056	0.0197986	0.018638	0.00239054	0.0242372	0.018774	0.0177505	0.0211654	0.017068	0.019799	0.00261804	0.941357	0.463	0.530995	0.0927975
Medulla motor related	8.03456	16.8685	11.3237	18.3415	17.3466	14.383	4.00731	16.4475	16.1026	16.3909	14.9653	14.8512	15.7515	0.699311	0.913118	0.476	0.53592	0.0929019
Magnocellular reticular nucleus	0.268979	0.725709	0.371404	0.792634	0.711384	0.574022	0.211553	0.705952	0.666305	0.705582	0.562932	0.592259	0.646606	0.0588952	0.887746	0.467	0.540123	0.0930063
Piriform-amygdalar area	0.788847	0.760527	0.727106	0.797755	0.892302	0.793307	0.0553116	0.843866	0.759151	0.76293	0.774245	0.717879	0.771614	0.0408544	1.02811	0.446	0.547156	0.0931106
Ventromedial hypothalamic nucleus ventrolateral part	0.204807	0.17443	0.148152	0.187406	0.183649	0.179689	0.0185923	0.189802	0.16248	0.185697	0.164544	0.162146	0.172934	0.0121941	1.03906	0.43	0.562898	0.093215
Hypoglossal nucleus	0.191153	0.477548	0.309959	0.483022	0.447516	0.38184	0.114228	0.432857	0.458085	0.413382	0.402143	0.382323	0.417758	0.0259726	0.914021	0.434	0.569933	0.0933194
Lateral reticular nucleus	0.211292	0.526019	0.37277	0.576554	0.610002	0.459327	0.148261	0.532878	0.527037	0.537635	0.481001	0.450253	0.505761	0.0343456	0.908191	0.431	0.571661	0.0934238
ventral spinocerebellar tract	0.338955	0.61204	0.450259	0.671793	0.639699	0.542549	0.127231	0.606272	0.598378	0.604541	0.549618	0.550954	0.581953	0.0259918	0.932291	0.429	0.574312	0.0935282
rubrospinal tract	0.398007	0.446144	0.3854	0.509648	0.489845	0.445809	0.0488854	0.462897	0.443748	0.445469	0.398388	0.396318	0.429364	0.02699	1.0383	0.416	0.576592	0.0936326
Main olfactory bulb inner plexiform layer	1.0609	1.04385	1.04628	1.08723	1.16573	1.0808	0.0451823	1.12857	1.03018	1.09097	1.08592	1.1596	1.09905	0.0436308	0.983393	0.411	0.577136	0.093737
Nucleus x	0.030721	0.0512024	0.0505219	0.0710026	0.0696364	0.0546169	0.0147886	0.0607638	0.0570046	0.06042	0.061448	0.055983	0.0591239	0.00219669	0.92377	0.426	0.577785	0.0938413
Lateral reticular nucleus magnocellular part	0.202758	0.498029	0.348874	0.547198	0.577231	0.434818	0.140103	0.501131	0.499388	0.509985	0.452325	0.424651	0.477496	0.033225	0.910621	0.419	0.582153	0.0939457
Parabrachial nucleus lateral division external lateral part	0.0918216	0.0832893	0.0928511	0.0931909	0.0955794	0.0913464	0.00421255	0.0931939	0.0914804	0.0877284	0.0952444	0.0788541	0.0893002	0.0057765	1.02291	0.405	0.584196	0.0940501
gracile fascicle	0.00648554	0.00409619	0.00580319	0.00682717	0.00887523	0.00641747	0.00154782	0.00648602	0.00614421	0.00750983	0.00477929	0.00443767	0.0058714	0.00113004	1.093	0.403	0.585821	0.0941545
Nucleus raphe obscurus	0.0266249	0.0590535	0.0358432	0.0597377	0.0556409	0.04738	0.0135728	0.0583742	0.0515431	0.0570064	0.0454032	0.0457422	0.0516138	0.00543756	0.917972	0.41	0.586462	0.0942589
Nucleus of Roller	0.0129711	0.0334522	0.0221887	0.0344772	0.0368663	0.0279911	0.00905464	0.0286751	0.030721	0.0324288	0.0314067	0.0300396	0.0306543	0.00126607	0.913123	0.412	0.590329	0.0943633
Medial mammillary nucleus median part	0.0187739	0.0160434	0.0133132	0.0174093	0.016385	0.016385	0.00180603	0.0180926	0.0194567	0.0170678	0.0160448	0.0146785	0.0170681	0.00164392	0.959979	0.396	0.591335	0.0944676
Main olfactory bulb outer plexiform layer	4.92526	4.77275	4.68386	5.05654	5.28315	4.94431	0.212152	5.12123	4.93755	4.95956	4.82606	5.22451	5.01378	0.14138	0.986144	0.385	0.602769	0.094572
Parapyramidal nucleus	0.0180912	0.0259426	0.0153614	0.0296982	0.030722	0.0239631	0.00617996	0.0269682	0.0269662	0.025943	0.0235551	0.0249193	0.0256704	0.00130205	0.933492	0.382	0.615224	0.0946764
Medulla	15.7213	29.1615	22.2604	32.372	31.491	26.2012	6.32746	28.9041	28.8334	28.807	26.4124	26.4748	27.8863	1.17858	0.939572	0.37	0.626505	0.0947808
Ventromedial hypothalamic nucleus central part	0.148143	0.121179	0.0768069	0.12323	0.12835	0.119542	0.0234016	0.131769	0.104793	0.12084	0.108558	0.0986529	0.112923	0.011888	1.05862	0.357	0.632173	0.0948852
Accessory olfactory bulb mitral layer	0.168965	0.14678	0.1502	0.164535	0.17375	0.160846	0.0105567	0.167612	0.161115	0.156682	0.164544	0.168632	0.163717	0.00438797	0.982464	0.355	0.635506	0.0949896
Spinal nucleus of the trigeminal caudal part	0.484709	0.976942	0.857165	1.10839	1.11828	0.909097	0.232758	0.974952	1.02984	1.00051	0.866417	0.952393	0.964823	0.0555727	0.942243	0.329	0.663276	0.0950939
inferior cerebellar peduncle	0.362508	0.437951	0.519556	0.56529	0.573818	0.491825	0.0806403	0.475869	0.490513	0.493259	0.444815	0.459811	0.472853	0.0184042	1.04012	0.324	0.66812	0.0951983
Ventromedial hypothalamic nucleus anterior part	0.0215047	0.0150194	0.0119477	0.0194574	0.0167264	0.0169311	0.00334157	0.0191167	0.0150192	0.0211641	0.0177516	0.0160439	0.0178191	0.00218485	0.950168	0.315	0.670082	0.0953027
Superior olivary complex	0.565266	0.871465	0.559837	0.930543	0.813449	0.748112	0.155978	0.780371	0.820252	0.805599	0.752055	0.761232	0.783902	0.0258175	0.954344	0.32	0.673043	0.0954071
vestibular nerve	0.113326	0.109232	0.12255	0.135861	0.140638	0.124321	0.0122566	0.12221	0.119129	0.130057	0.113679	0.121865	0.121388	0.00530247	1.02416	0.311	0.677333	0.0955115
Piriform-amygdalar area pyramidal layer	0.206172	0.194569	0.200722	0.211984	0.242362	0.211162	0.0166333	0.223938	0.201394	0.209251	0.214385	0.184334	0.20666	0.01335	1.02178	0.298	0.684575	0.0956159
Orbital area lateral part layer 6b	0.000682688	0.000682699	0.00102409	0.00102408	0.00136542	0.000955795	0.000255456	0.00136548	0.00102403	0.00102407	0.000682755	0.00102408	0.00102408	0.000215896	0.933318	0.289	0.694028	0.0957203
Orbital area ventrolateral part layer 6b	0.00204807	0.0020481	0.00204819	0.00170679	0.00204813	0.00197985	0.000136531	0.00238959	0.00170672	0.00238949	0.00170689	0.00204816	0.00204817	0.000305327	0.966646	0.289	0.698221	0.0958246
Pontine reticular nucleus caudal part	2.47509	3.16499	2.44758	3.47196	3.2736	2.96664	0.424254	2.94909	2.95571	3.00018	2.71737	2.76228	2.87692	0.114199	1.03119	0.289	0.701373	0.095929
spinal tract of the trigeminal nerve	0.463887	0.814801	0.757146	0.977651	0.948284	0.792354	0.183458	0.843524	0.861555	0.853048	0.786876	0.80083	0.829166	0.0297219	0.955603	0.28	0.711254	0.0960334
Piriform-amygdalar area polymorph layer	0.269662	0.267277	0.221887	0.276842	0.302782	0.26769	0.0261427	0.28402	0.271711	0.245776	0.254668	0.25363	0.261961	0.0139009	1.02187	0.274	0.711925	0.0961378
Inferior olivary complex	0.168965	0.45024	0.371746	0.484388	0.509984	0.397065	0.123186	0.446511	0.450575	0.453662	0.382684	0.373789	0.421444	0.0354636	0.942152	0.269	0.720391	0.0962422
Main olfactory bulb mitral layer	0.910365	0.910379	0.894033	0.954097	1.00939	0.935652	0.0419222	0.960956	0.914463	0.930194	0.93162	0.985847	0.944616	0.025507	0.990511	0.258	0.726285	0.0963466
sensory root of the trigeminal nerve	0.484709	0.833575	0.778652	0.995743	0.970472	0.81263	0.183068	0.861276	0.877598	0.873529	0.802238	0.819263	0.846781	0.0303861	0.95967	0.26	0.730555	0.0964509
Lateral reticular nucleus parvicellular part	0.00375479	0.0102405	0.00921683	0.00921668	0.0102407	0.00853389	0.00243302	0.0105825	0.00785093	0.0102407	0.00819307	0.00819263	0.00901195	0.00115465	0.946952	0.251	0.735301	0.0965553
Superior olivary complex periolivary region	0.49256	0.739022	0.487809	0.785807	0.696706	0.640381	0.125842	0.665671	0.69532	0.67486	0.636328	0.644487	0.663333	0.021194	0.965398	0.254	0.736317	0.0966597
dorsal limb	0.0139951	0.0116059	0.0126305	0.0146784	0.0146783	0.0135176	0.00121362	0.0133134	0.0129711	0.0119474	0.0129724	0.0150198	0.0132448	0.000998766	1.0206	0.245	0.737773	0.0967641
Posterolateral visual area layer 6b	0.0324277	0.0126299	0.0180923	0.018092	0.0228708	0.0208225	0.00664686	0.0197994	0.0204807	0.0163851	0.0197999	0.021847	0.0196624	0.00180115	1.059	0.238	0.751047	0.0968685
Frontal pole layer 2/3	0.105817	0.10377	0.0962647	0.117086	0.104455	0.105478	0.00668892	0.105142	0.108889	0.111623	0.0989995	0.0955807	0.104047	0.00598665	1.01376	0.226	0.75803	0.0969729
Spinal nucleus of the trigeminal oral part rostral dorsomedial part	0.061442	0.0901163	0.0856824	0.114355	0.105479	0.0914149	0.0182042	0.0983145	0.097966	0.0884111	0.0873927	0.10036	0.0944888	0.00544953	0.967468	0.229	0.760159	0.0970772
Prelimbic area layer 2	0.173744	0.15941	0.145421	0.178189	0.158047	0.162962	0.0117692	0.160444	0.170331	0.174433	0.153279	0.143712	0.16044	0.0111779	1.01572	0.22	0.763888	0.0971816
Prelimbic area layer 1	0.380599	0.37446	0.287429	0.396659	0.367639	0.361357	0.0381917	0.355707	0.379917	0.383001	0.344791	0.31132	0.354947	0.0261441	1.01806	0.196	0.789712	0.097286
Nucleus of the trapezoid body	0.0754371	0.118107	0.0798792	0.13074	0.121864	0.105205	0.0229065	0.116407	0.116057	0.114013	0.0942202	0.101042	0.108348	0.00904915	0.970996	0.18	0.808333	0.0973904
Medulla sensory related	4.48185	6.93349	6.44496	8.05435	8.13859	6.81065	1.33284	7.07898	7.37817	7.09201	6.58381	6.72854	6.9723	0.28312	0.976815	0.168	0.823179	0.0974948
medial longitudinal fascicle	0.756077	1.09334	0.764314	1.18383	1.17733	0.99498	0.194357	1.09614	1.04349	1.05069	0.921037	0.977654	1.0178	0.0614062	0.977576	0.158	0.832037	0.0975992
trigeminal nerve	0.704534	1.05682	1.01214	1.2562	1.23571	1.05308	0.198888	1.08965	1.11586	1.09712	1.02755	1.04593	1.07522	0.0330756	0.979409	0.155	0.836386	0.0977035
vagus nerve	0.0204807	0.0467649	0.044036	0.0474488	0.0549582	0.0427377	0.0117031	0.0474504	0.0457402	0.0430108	0.0426722	0.0413045	0.0440356	0.00223313	0.970525	0.154	0.837498	0.0978079
solitary tract	0.0204807	0.0467649	0.044036	0.0474488	0.0549582	0.0427377	0.0117031	0.0474504	0.0457402	0.0430108	0.0426722	0.0413045	0.0440356	0.00223313	0.970525	0.154	0.837498	0.0979123
Nucleus of the solitary tract lateral part	0.162139	0.317796	0.331123	0.347162	0.401434	0.311931	0.0801155	0.358779	0.335201	0.312682	0.313043	0.283328	0.320607	0.0252183	0.972938	0.146	0.844826	0.0980167
facial nerve	0.125273	0.236214	0.175803	0.282986	0.251579	0.214371	0.0565606	0.227352	0.222898	0.224271	0.214727	0.211643	0.220178	0.00596965	0.973625	0.144	0.847951	0.0981211
Orbital area medial part layer 2	0.0849947	0.0846547	0.0884133	0.0928495	0.0706605	0.0843145	0.0074385	0.0805632	0.0808987	0.0795359	0.0819307	0.0942152	0.0834288	0.00544719	1.01062	0.136	0.852838	0.0982255
Ventral cochlear nucleus	0.743448	0.950317	0.89574	1.07664	1.12886	0.959002	0.136553	0.881075	1.00287	0.958185	0.969171	0.917575	0.945776	0.0422913	1.01398	0.131	0.860815	0.0983299
Nucleus of the solitary tract central part	0.00955764	0.0163848	0.0153614	0.0136543	0.0174091	0.0144734	0.00275303	0.0170685	0.0143365	0.0133129	0.0146792	0.0143371	0.0147468	0.00124797	0.981461	0.128	0.862846	0.0984342
vomeronasal nerve	0.0283316	0.0269666	0.0273091	0.0317463	0.0320874	0.0292882	0.00219543	0.0290164	0.0290143	0.0300393	0.0303826	0.0290156	0.0294936	0.000595662	0.993034	0.128	0.864372	0.0985386
Accessory facial motor nucleus	0.00409613	0.0122886	0.00546183	0.0122889	0.0133128	0.00948966	0.00388845	0.00819287	0.0116057	0.010582	0.00989995	0.00887535	0.00983119	0.00120956	0.965261	0.119	0.873674	0.098643
trapezoid body	0.145754	0.200031	0.161124	0.236561	0.224953	0.193685	0.0352532	0.190826	0.205831	0.200717	0.20073	0.182627	0.196146	0.00832788	0.98745	0.096	0.897826	0.0987474
oculomotor nerve	0.838341	1.13157	0.81074	1.22855	1.23059	1.04796	0.186102	1.13642	1.08548	1.09131	0.963368	1.0193	1.05918	0.0607626	0.989409	0.081	0.913359	0.0988518
genu of the facial nerve	0.0460815	0.0935297	0.0706624	0.116403	0.1007	0.0854753	0.0245947	0.0870493	0.0853362	0.0880698	0.0839789	0.0894362	0.0867741	0.00193504	0.985033	0.074	0.921157	0.0989562
Nucleus of the solitary tract	0.541372	0.838354	0.840439	0.906648	1.00563	0.826489	0.155013	0.890633	0.87555	0.776243	0.81282	0.749284	0.820906	0.054841	1.0068	0.048	0.948499	0.0990605
olfactory nerve layer of main olfactory bulb	1.61661	1.6634	1.60168	1.70099	1.80782	1.6781	0.0737399	1.699	1.70536	1.67572	1.62291	1.70065	1.68073	0.0306776	0.998436	0.047	0.949899	0.0991649
pyramid	0.0539324	0.0894336	0.0682728	0.101042	0.104796	0.0834954	0.0195067	0.0928525	0.0884083	0.0904593	0.07681	0.0723682	0.0841797	0.00807906	0.991871	0.046	0.950677	0.0992693
Nucleus of the solitary tract medial part	0.264542	0.409619	0.397007	0.450935	0.475849	0.39959	0.0732079	0.423981	0.430777	0.374467	0.394974	0.361841	0.397208	0.0268948	1.006	0.043	0.953631	0.0993737
Orbital area medial part layer 1	0.21846	0.217781	0.187409	0.234855	0.218126	0.215326	0.015391	0.214039	0.207879	0.222564	0.208582	0.221201	0.214853	0.00613812	1.0022	0.04	0.956564	0.0994781
Frontal pole cerebral cortex	0.658794	0.646857	0.605921	0.696371	0.694658	0.66052	0.0335301	0.66806	0.678252	0.675543	0.640766	0.635612	0.659647	0.0179099	1.00132	0.033	0.964801	0.0995825
Frontal pole layer 1	0.552978	0.543087	0.509657	0.579285	0.590203	0.555042	0.0283938	0.562919	0.569363	0.56392	0.541766	0.540031	0.5556	0.0122145	0.998996	0.026	0.972496	0.0996868
Dorsal motor nucleus of the vagus nerve	0.0720236	0.130395	0.108554	0.132106	0.127667	0.114149	0.0226935	0.1147	0.126639	0.106503	0.122555	0.0993356	0.113946	0.0100464	1.00178	0.012	0.987548	0.0997912
Hindbrain	34.4986	47.9453	39.3521	53.0024	52.0123	45.3621	7.25818	46.9786	46.8615	46.4367	43.0371	43.4701	45.3568	1.73211	1.00012	0.001	0.998923	0.0998956
Entorhinal area medial part ventral zone layer 5/6	0.0030721	0.0020481	0.00238955	0.00204815	0.00238949	0.00238948	0.000373903	0.00273096	0.00204807	0.00375491	0.00204827	0.00136544	0.00238953	0.000807795	0.999978	0	0.99991	0.1
Frontal pole layer 5	0	0	0	0	0			0	0	0	0	0
Frontal pole layer 6a	0	0	0	0	0			0	0	0	0	0
Frontal pole layer 6b	0	0	0	0	0			0	0	0	0	0
Somatomotor areas Layer 1	0	0	0	0	0			0	0	0	0	0
Somatomotor areas Layer 2/3	0	0	0	0	0			0	0	0	0	0
Somatomotor areas Layer 5	0	0	0	0	0			0	0	0	0	0
Somatomotor areas Layer 6a	0	0	0	0	0			0	0	0	0	0
Somatomotor areas Layer 6b	0	0	0	0	0			0	0	0	0	0
Somatosensory areas layer 1	0	0	0	0	0			0	0	0	0	0
Somatosensory areas layer 2/3	0	0	0	0	0			0	0	0	0	0
Somatosensory areas layer 4	0	0	0	0	0			0	0	0	0	0
Somatosensory areas layer 5	0	0	0	0	0			0	0	0	0	0
Somatosensory areas layer 6a	0	0	0	0	0			0	0	0	0	0
Somatosensory areas layer 6b	0	0	0	0	0			0	0	0	0	0
Primary somatosensory area layer 1	0	0	0	0	0			0	0	0	0	0
Primary somatosensory area layer 2/3	0	0	0	0	0			0	0	0	0	0
Primary somatosensory area layer 4	0	0	0	0	0			0	0	0	0	0
Primary somatosensory area layer 5	0	0	0	0	0			0	0	0	0	0
Primary somatosensory area layer 6a	0	0	0	0	0			0	0	0	0	0
Primary somatosensory area layer 6b	0	0	0	0	0			0	0	0	0	0
Rostrolateral lateral visual area	0	0	0	0	0			0	0	0	0	0
Rostrolateral lateral visual area layer 1	0	0	0	0	0			0	0	0	0	0
Rostrolateral lateral visual area layer 2/3	0	0	0	0	0			0	0	0	0	0
Rostrolateral lateral visual area layer 4	0	0	0	0	0			0	0	0	0	0
Rostrolateral lateral visual arealayer 5	0	0	0	0	0			0	0	0	0	0
Rostrolateral lateral visual area layer 6a	0	0	0	0	0			0	0	0	0	0
Rostrolateral lateral visual area layer 6b	0	0	0	0	0			0	0	0	0	0
Laterolateral anterior visual area	0	0	0	0	0			0	0	0	0	0
Laterolateral anterior visual area layer 1	0	0	0	0	0			0	0	0	0	0
Laterolateral anterior visual area layer 2/3	0	0	0	0	0			0	0	0	0	0
Laterolateral anterior visual area layer 4	0	0	0	0	0			0	0	0	0	0
Laterolateral anterior visual arealayer 5	0	0	0	0	0			0	0	0	0	0
Laterolateral anterior visual area layer 6a	0	0	0	0	0			0	0	0	0	0
Laterolateral anterior visual area layer 6b	0	0	0	0	0			0	0	0	0	0
Visual areas layer 1	0	0	0	0	0			0	0	0	0	0
Visual areas layer 2/3	0	0	0	0	0			0	0	0	0	0
Visual areas layer 4	0	0	0	0	0			0	0	0	0	0
Visual areas layer 5	0	0	0	0	0			0	0	0	0	0
Visual areas layer 6a	0	0	0	0	0			0	0	0	0	0
Visual areas layer 6b	0	0	0	0	0			0	0	0	0	0
Laterointermediate area	0	0	0	0	0			0	0	0	0	0
Laterointermediate area layer 1	0	0	0	0	0			0	0	0	0	0
Laterointermediate area layer 2/3	0	0	0	0	0			0	0	0	0	0
Laterointermediate area layer 4	0	0	0	0	0			0	0	0	0	0
Laterointermediate area layer 5	0	0	0	0	0			0	0	0	0	0
Laterointermediate area layer 6a	0	0	0	0	0			0	0	0	0	0
Laterointermediate area layer 6b	0	0	0	0	0			0	0	0	0	0
Postrhinal area	0	0	0	0	0			0	0	0	0	0
Postrhinal area layer 1	0	0	0	0	0			0	0	0	0	0
Postrhinal area layer 2/3	0	0	0	0	0			0	0	0	0	0
Postrhinal area layer 4	0	0	0	0	0			0	0	0	0	0
Postrhinal area layer 5	0	0	0	0	0			0	0	0	0	0
Postrhinal area layer 6a	0	0	0	0	0			0	0	0	0	0
Postrhinal area layer 6b	0	0	0	0	0			0	0	0	0	0
Anterior cingulate area layer 1	0	0	0	0	0			0	0	0	0	0
Anterior cingulate area layer 2/3	0	0	0	0	0			0	0	0	0	0
Anterior cingulate area layer 5	0	0	0	0	0			0	0	0	0	0
Anterior cingulate area layer 6a	0	0	0	0	0			0	0	0	0	0
Anterior cingulate area layer 6b	0	0	0	0	0			0	0	0	0	0
Orbital area layer 1	0	0	0	0	0			0	0	0	0	0
Orbital area layer 2/3	0	0	0	0	0			0	0	0	0	0
Orbital area layer 5	0	0	0	0	0			0	0	0	0	0
Orbital area layer 6a	0	0	0	0	0			0	0	0	0	0
Orbital area layer 6b	0	0	0	0	0			0	0	0	0	0
Orbital area medial part layer 6b	0	0	0	0	0			0	0	0	0	0
Orbital area ventral part	0	0	0	0	0			0	0	0	0	0
Agranular insular area posterior part layer 6b	0	0	0	0	0			0	0	0	0	0
Mediomedial anterior visual area	0	0	0	0	0			0	0	0	0	0
Mediomedial anterior visual area layer 1	0	0	0	0	0			0	0	0	0	0
Mediomedial anterior visual area layer 2/3	0	0	0	0	0			0	0	0	0	0
Mediomedial anterior visual area layer 4	0	0	0	0	0			0	0	0	0	0
Mediomedial anterior visual arealayer 5	0	0	0	0	0			0	0	0	0	0
Mediomedial anterior visual area layer 6a	0	0	0	0	0			0	0	0	0	0
Mediomedial anterior visual area layer 6b	0	0	0	0	0			0	0	0	0	0
Mediomedial posterior visual area	0	0	0	0	0			0	0	0	0	0
Mediomedial posterior visual area layer 1	0	0	0	0	0			0	0	0	0	0
Mediomedial posterior visual area layer 2/3	0	0	0	0	0			0	0	0	0	0
Mediomedial posterior visual area layer 4	0	0	0	0	0			0	0	0	0	0
Mediomedial posterior visual arealayer 5	0	0	0	0	0			0	0	0	0	0
Mediomedial posterior visual area layer 6a	0	0	0	0	0			0	0	0	0	0
Mediomedial posterior visual area layer 6b	0	0	0	0	0			0	0	0	0	0
Medial visual area	0	0	0	0	0			0	0	0	0	0
Medial visual area layer 1	0	0	0	0	0			0	0	0	0	0
Medial visual area layer 2/3	0	0	0	0	0			0	0	0	0	0
Medial visual area layer 4	0	0	0	0	0			0	0	0	0	0
Medial visual arealayer 5	0	0	0	0	0			0	0	0	0	0
Medial visual area layer 6a	0	0	0	0	0			0	0	0	0	0
Medial visual area layer 6b	0	0	0	0	0			0	0	0	0	0
Retrosplenial area dorsal part layer 4	0	0	0	0	0			0	0	0	0	0
Anterior area	0	0	0	0	0			0	0	0	0	0
Anterior area layer 1	0	0	0	0	0			0	0	0	0	0
Anterior area layer 2/3	0	0	0	0	0			0	0	0	0	0
Anterior area layer 4	0	0	0	0	0			0	0	0	0	0
Anterior area layer 5	0	0	0	0	0			0	0	0	0	0
Anterior area layer 6a	0	0	0	0	0			0	0	0	0	0
Anterior area layer 6b	0	0	0	0	0			0	0	0	0	0
Rostrolateral visual area	0	0	0	0	0			0	0	0	0	0
Rostrolateral area layer 1	0	0	0	0	0			0	0	0	0	0
Rostrolateral area layer 2/3	0	0	0	0	0			0	0	0	0	0
Rostrolateral area layer 4	0	0	0	0	0			0	0	0	0	0
Rostrolateral area layer 5	0	0	0	0	0			0	0	0	0	0
Rostrolateral area layer 6a	0	0	0	0	0			0	0	0	0	0
Rostrolateral area layer 6b	0	0	0	0	0			0	0	0	0	0
Anterior olfactory nucleus layer 2	0	0	0	0	0			0	0	0	0	0
Taenia tecta dorsal part layers 1-4	0	0	0	0	0			0	0	0	0	0
Taenia tecta ventral part layers 1-3	0	0	0	0	0			0	0	0	0	0
Dorsal peduncular area layer 2	0	0	0	0	0			0	0	0	0	0
Piriform area layers 1-3	0	0	0	0	0			0	0	0	0	0
Nucleus of the lateral olfactory tract layers 1-3	0	0	0	0	0			0	0	0	0	0
Cortical amygdalar area anterior part layer 3	0	0	0	0	0			0	0	0	0	0
Cortical amygdalar area posterior part lateral zone layers 1-2	0	0	0	0	0			0	0	0	0	0
Cortical amygdalar area posterior part lateral zone layers 1-3	0	0	0	0	0			0	0	0	0	0
Cortical amygdalar area posterior part medial zone layers 1-2	0	0	0	0	0			0	0	0	0	0
Cortical amygdalar area posterior part medial zone layers 1-3	0	0	0	0	0			0	0	0	0	0
Piriform-amygdalar area layers 1-3	0	0	0	0	0			0	0	0	0	0
Postpiriform transition area layers 1-3	0	0	0	0	0			0	0	0	0	0
Dentate gyrus subgranular zone	0	0	0	0	0			0	0	0	0	0
Dentate gyrus crest	0	0	0	0	0			0	0	0	0	0
Dentate gyrus crest molecular layer	0	0	0	0	0			0	0	0	0	0
Dentate gyrus crest polymorph layer	0	0	0	0	0			0	0	0	0	0
Dentate gyrus crest granule cell layer	0	0	0	0	0			0	0	0	0	0
Dentate gyrus lateral blade	0	0	0	0	0			0	0	0	0	0
Dentate gyrus lateral blade molecular layer	0	0	0	0	0			0	0	0	0	0
Dentate gyrus lateral blade polymorph layer	0	0	0	0	0			0	0	0	0	0
Dentate gyrus lateral blade granule cell layer	0	0	0	0	0			0	0	0	0	0
Dentate gyrus medial blade	0	0	0	0	0			0	0	0	0	0
Dentate gyrus medial blade molecular layer	0	0	0	0	0			0	0	0	0	0
Dentate gyrus medial blade polymorph layer	0	0	0	0	0			0	0	0	0	0
Dentate gyrus medial blade granule cell layer	0	0	0	0	0			0	0	0	0	0
Entorhinal area lateral part layer 5/6	0	0	0	0	0			0	0	0	0	0
Entorhinal area medial part dorsal zone layer 5/6	0	0	0	0	0			0	0	0	0	0
Entorhinal area medial part ventral zone layer 4	0	0	0	0	0			0	0	0	0	0
Prosubiculum	0	0	0	0	0			0	0	0	0	0
Prosubiculum dorsal part	0	0	0	0	0			0	0	0	0	0
Prosubiculum dorsal part molecular layer	0	0	0	0	0			0	0	0	0	0
Prosubiculum dorsal part pyramidal layer	0	0	0	0	0			0	0	0	0	0
Prosubiculum dorsal part stratum radiatum	0	0	0	0	0			0	0	0	0	0
Prosubiculum ventral part	0	0	0	0	0			0	0	0	0	0
Prosubiculum ventral part molecular layer	0	0	0	0	0			0	0	0	0	0
Prosubiculum ventral part pyramidal layer	0	0	0	0	0			0	0	0	0	0
Prosubiculum ventral part stratum radiatum	0	0	0	0	0			0	0	0	0	0
Hippocampo-amygdalar transition area	0	0	0	0	0			0	0	0	0	0
Area prostriata	0	0	0	0	0			0	0	0	0	0
Layer 6b isocortex	0	0	0	0	0			0	0	0	0	0
Olfactory tubercle layers 1-3	0	0	0	0	0			0	0	0	0	0
Lateral strip of striatum	0	0	0	0	0			0	0	0	0	0
Posterior triangular thalamic nucleus	0	0	0	0	0			0	0	0	0	0
Dorsal part of the lateral geniculate complex shell	0	0	0	0	0			0	0	0	0	0
Dorsal part of the lateral geniculate complex core	0	0	0	0	0			0	0	0	0	0
Dorsal part of the lateral geniculate complex ipsilateral zone	0	0	0	0	0			0	0	0	0	0
Ethmoid nucleus of the thalamus	0	0	0	0	0			0	0	0	0	0
Retroethmoid nucleus	0	0	0	0	0			0	0	0	0	0
Xiphoid thalamic nucleus	0	0	0	0	0			0	0	0	0	0
Posterior intralaminar thalamic nucleus	0	0	0	0	0			0	0	0	0	0
Intermediate geniculate nucleus	0	0	0	0	0			0	0	0	0	0
Ventral part of the lateral geniculate complex lateral zone	0	0	0	0	0			0	0	0	0	0
Ventral part of the lateral geniculate complex medial zone	0	0	0	0	0			0	0	0	0	0
Pineal body	0	0	0	0	0			0	0	0	0	0
Paraventricular hypothalamic nucleus magnocellular division anterior magnocellular part	0	0	0	0	0			0	0	0	0	0
Anterior hypothalamic area	0	0	0	0	0			0	0	0	0	0
Suprachiasmatic preoptic nucleus	0	0	0	0	0			0	0	0	0	0
Ventromedial preoptic nucleus	0	0	0	0	0			0	0	0	0	0
Anterior hypothalamic nucleus dorsal part	0	0	0	0	0			0	0	0	0	0
Medial mammillary nucleus lateral part	0	0	0	0	0			0	0	0	0	0
Medial mammillary nucleus medial part	0	0	0	0	0			0	0	0	0	0
Medial mammillary nucleus posterior part	0	0	0	0	0			0	0	0	0	0
Medial mammillary nucleus dorsal part	0	0	0	0	0			0	0	0	0	0
Perifornical nucleus	0	0	0	0	0			0	0	0	0	0
Subcommissural organ	0	0	0	0	0			0	0	0	0	0
Paranigral nucleus	0	0	0	0	0			0	0	0	0	0
Midbrain reticular nucleus magnocellular part	0	0	0	0	0			0	0	0	0	0
Midbrain reticular nucleus magnocellular part general	0	0	0	0	0			0	0	0	0	0
Midbrain reticular nucleus parvicellular part	0	0	0	0	0			0	0	0	0	0
Supraoculomotor periaqueductal gray	0	0	0	0	0			0	0	0	0	0
Retroparafascicular nucleus	0	0	0	0	0			0	0	0	0	0
Intercollicular nucleus	0	0	0	0	0			0	0	0	0	0
Medial accesory oculomotor nucleus	0	0	0	0	0			0	0	0	0	0
Paratrochlear nucleus	0	0	0	0	0			0	0	0	0	0
Dorsal terminal nucleus of the accessory optic tract	0	0	0	0	0			0	0	0	0	0
Medial terminal nucleus of the accessory optic tract	0	0	0	0	0			0	0	0	0	0
Substantia nigra lateral part	0	0	0	0	0			0	0	0	0	0
Interpeduncular nucleus rostral	0	0	0	0	0			0	0	0	0	0
Interpeduncular nucleus caudal	0	0	0	0	0			0	0	0	0	0
Interpeduncular nucleus apical	0	0	0	0	0			0	0	0	0	0
Interpeduncular nucleus lateral	0	0	0	0	0			0	0	0	0	0
Interpeduncular nucleus intermediate	0	0	0	0	0			0	0	0	0	0
Interpeduncular nucleus dorsomedial	0	0	0	0	0			0	0	0	0	0
Interpeduncular nucleus dorsolateral	0	0	0	0	0			0	0	0	0	0
Interpeduncular nucleus rostrolateral	0	0	0	0	0			0	0	0	0	0
Parabrachial nucleus medial division ventral medial part	0	0	0	0	0			0	0	0	0	0
Lateral tegmental nucleus	0	0	0	0	0			0	0	0	0	0
Posterodorsal tegmental nucleus	0	0	0	0	0			0	0	0	0	0
Pontine reticular nucleus ventral part	0	0	0	0	0			0	0	0	0	0
Superior salivatory nucleus	0	0	0	0	0			0	0	0	0	0
Peritrigeminal zone	0	0	0	0	0			0	0	0	0	0
Accessory trigeminal nucleus	0	0	0	0	0			0	0	0	0	0
Parvicellular motor 5 nucleus	0	0	0	0	0			0	0	0	0	0
Intertrigeminal nucleus	0	0	0	0	0			0	0	0	0	0
Paratrigeminal nucleus	0	0	0	0	0			0	0	0	0	0
Nucleus z	0	0	0	0	0			0	0	0	0	0
Accessory abducens nucleus	0	0	0	0	0			0	0	0	0	0
Efferent vestibular nucleus	0	0	0	0	0			0	0	0	0	0
Efferent cochlear group	0	0	0	0	0			0	0	0	0	0
Nucleus intercalatus	0	0	0	0	0			0	0	0	0	0
Paramedian reticular nucleus	0	0	0	0	0			0	0	0	0	0
Parapyramidal nucleus deep part	0	0	0	0	0			0	0	0	0	0
Parapyramidal nucleus superficial part	0	0	0	0	0			0	0	0	0	0
Interstitial nucleus of the vestibular nerve	0	0	0	0	0			0	0	0	0	0
Cerebellar cortex molecular layer	0	0	0	0	0			0	0	0	0	0
Cerebellar cortex Purkinje layer	0	0	0	0	0			0	0	0	0	0
Cerebellar cortex granular layer	0	0	0	0	0			0	0	0	0	0
Lingula (I) Purkinje layer	0	0	0	0	0			0	0	0	0	0
Lobule II Purkinje layer	0	0	0	0	0			0	0	0	0	0
Lobule III Purkinje layer	0	0	0	0	0			0	0	0	0	0
Lobule IV	0	0	0	0	0			0	0	0	0	0
Lobule IV molecular layer	0	0	0	0	0			0	0	0	0	0
Lobule IV Purkinje layer	0	0	0	0	0			0	0	0	0	0
Lobule IV granular layer	0	0	0	0	0			0	0	0	0	0
Lobule V	0	0	0	0	0			0	0	0	0	0
Lobule V molecular layer	0	0	0	0	0			0	0	0	0	0
Lobule V Purkinje layer	0	0	0	0	0			0	0	0	0	0
Lobule V granular layer	0	0	0	0	0			0	0	0	0	0
Lobules IV-V Purkinje layer	0	0	0	0	0			0	0	0	0	0
Declive (VI) Purkinje layer	0	0	0	0	0			0	0	0	0	0
Folium-tuber vermis (VII) Purkinje layer	0	0	0	0	0			0	0	0	0	0
Pyramus (VIII) Purkinje layer	0	0	0	0	0			0	0	0	0	0
Uvula (IX) Purkinje layer	0	0	0	0	0			0	0	0	0	0
Nodulus (X) Purkinje layer	0	0	0	0	0			0	0	0	0	0
Simple lobule Purkinje layer	0	0	0	0	0			0	0	0	0	0
Crus 1 Purkinje layer	0	0	0	0	0			0	0	0	0	0
Crus 2 Purkinje layer	0	0	0	0	0			0	0	0	0	0
Paramedian lobule Purkinje layer	0	0	0	0	0			0	0	0	0	0
Copula pyramidis Purkinje layer	0	0	0	0	0			0	0	0	0	0
Paraflocculus Purkinje layer	0	0	0	0	0			0	0	0	0	0
Flocculus Purkinje layer	0	0	0	0	0			0	0	0	0	0
Vestibulocerebellar nucleus	0	0	0	0	0			0	0	0	0	0
terminal nerve	0	0	0	0	0			0	0	0	0	0
accessory olfactory tract	0	0	0	0	0			0	0	0	0	0
accessory optic tract	0	0	0	0	0			0	0	0	0	0
tectothalamic pathway	0	0	0	0	0			0	0	0	0	0
trochlear nerve	0	0	0	0	0			0	0	0	0	0
trochlear nerve decussation	0	0	0	0	0			0	0	0	0	0
abducens nerve	0	0	0	0	0			0	0	0	0	0
intermediate nerve	0	0	0	0	0			0	0	0	0	0
efferent cochleovestibular bundle	0	0	0	0	0			0	0	0	0	0
intermediate acoustic stria	0	0	0	0	0			0	0	0	0	0
dorsal acoustic stria	0	0	0	0	0			0	0	0	0	0
glossopharyngeal nerve	0	0	0	0	0			0	0	0	0	0
accessory spinal nerve	0	0	0	0	0			0	0	0	0	0
hypoglossal nerve	0	0	0	0	0			0	0	0	0	0
ventral roots	0	0	0	0	0			0	0	0	0	0
dorsolateral fascicle	0	0	0	0	0			0	0	0	0	0
dorsal commissure of the spinal cord	0	0	0	0	0			0	0	0	0	0
ventral commissure of the spinal cord	0	0	0	0	0			0	0	0	0	0
fasciculus proprius	0	0	0	0	0			0	0	0	0	0
internal arcuate fibers	0	0	0	0	0			0	0	0	0	0
spinothalamic tract	0	0	0	0	0			0	0	0	0	0
lateral spinothalamic tract	0	0	0	0	0			0	0	0	0	0
ventral spinothalamic tract	0	0	0	0	0			0	0	0	0	0
spinocervical tract	0	0	0	0	0			0	0	0	0	0
spino-olivary pathway	0	0	0	0	0			0	0	0	0	0
spinoreticular pathway	0	0	0	0	0			0	0	0	0	0
spinovestibular pathway	0	0	0	0	0			0	0	0	0	0
spinotectal pathway	0	0	0	0	0			0	0	0	0	0
spinohypothalamic pathway	0	0	0	0	0			0	0	0	0	0
spinotelenchephalic pathway	0	0	0	0	0			0	0	0	0	0
hypothalamohypophysial tract	0	0	0	0	0			0	0	0	0	0
spinocerebellar tract	0	0	0	0	0			0	0	0	0	0
uncinate fascicle	0	0	0	0	0			0	0	0	0	0
dorsal spinocerebellar tract	0	0	0	0	0			0	0	0	0	0
cuneocerebellar tract	0	0	0	0	0			0	0	0	0	0
juxtarestiform body	0	0	0	0	0			0	0	0	0	0
bulbocerebellar tract	0	0	0	0	0			0	0	0	0	0
olivocerebellar tract	0	0	0	0	0			0	0	0	0	0
reticulocerebellar tract	0	0	0	0	0			0	0	0	0	0
trigeminocerebellar tract	0	0	0	0	0			0	0	0	0	0
supra-callosal cerebral white matter	0	0	0	0	0			0	0	0	0	0
corpus callosum extreme capsule	0	0	0	0	0			0	0	0	0	0
corpus callosum rostrum	0	0	0	0	0			0	0	0	0	0
corpus callosum body	0	0	0	0	0			0	0	0	0	0
corticotectal tract	0	0	0	0	0			0	0	0	0	0
corticorubral tract	0	0	0	0	0			0	0	0	0	0
corticopontine tract	0	0	0	0	0			0	0	0	0	0
corticobulbar tract	0	0	0	0	0			0	0	0	0	0
pyramidal decussation	0	0	0	0	0			0	0	0	0	0
corticospinal tract crossed	0	0	0	0	0			0	0	0	0	0
corticospinal tract uncrossed	0	0	0	0	0			0	0	0	0	0
middle thalamic commissure	0	0	0	0	0			0	0	0	0	0
thalamic peduncles	0	0	0	0	0			0	0	0	0	0
optic radiation	0	0	0	0	0			0	0	0	0	0
auditory radiation	0	0	0	0	0			0	0	0	0	0
cerebral nuclei related	0	0	0	0	0			0	0	0	0	0
pallidothalamic pathway	0	0	0	0	0			0	0	0	0	0
nigrostriatal tract	0	0	0	0	0			0	0	0	0	0
nigrothalamic fibers	0	0	0	0	0			0	0	0	0	0
pallidotegmental fascicle	0	0	0	0	0			0	0	0	0	0
striatonigral pathway	0	0	0	0	0			0	0	0	0	0
subthalamic fascicle	0	0	0	0	0			0	0	0	0	0
direct tectospinal pathway	0	0	0	0	0			0	0	0	0	0
crossed tectospinal pathway	0	0	0	0	0			0	0	0	0	0
rubroreticular tract	0	0	0	0	0			0	0	0	0	0
central tegmental bundle	0	0	0	0	0			0	0	0	0	0
retriculospinal tract	0	0	0	0	0			0	0	0	0	0
retriculospinal tract lateral part	0	0	0	0	0			0	0	0	0	0
retriculospinal tract medial part	0	0	0	0	0			0	0	0	0	0
vestibulospinal pathway	0	0	0	0	0			0	0	0	0	0
ansa peduncularis	0	0	0	0	0			0	0	0	0	0
precommissural fornix general	0	0	0	0	0			0	0	0	0	0
precommissural fornix diagonal band	0	0	0	0	0			0	0	0	0	0
medial corticohypothalamic tract	0	0	0	0	0			0	0	0	0	0
perforant path	0	0	0	0	0			0	0	0	0	0
angular path	0	0	0	0	0			0	0	0	0	0
longitudinal association bundle	0	0	0	0	0			0	0	0	0	0
commissural branch of stria terminalis	0	0	0	0	0			0	0	0	0	0
medial forebrain bundle	0	0	0	0	0			0	0	0	0	0
ventrolateral hypothalamic tract	0	0	0	0	0			0	0	0	0	0
preoptic commissure	0	0	0	0	0			0	0	0	0	0
supraoptic commissures	0	0	0	0	0			0	0	0	0	0
supraoptic commissures anterior	0	0	0	0	0			0	0	0	0	0
supraoptic commissures dorsal	0	0	0	0	0			0	0	0	0	0
supraoptic commissures ventral	0	0	0	0	0			0	0	0	0	0
premammillary commissure	0	0	0	0	0			0	0	0	0	0
propriohypothalamic pathways	0	0	0	0	0			0	0	0	0	0
propriohypothalamic pathways dorsal	0	0	0	0	0			0	0	0	0	0
propriohypothalamic pathways lateral	0	0	0	0	0			0	0	0	0	0
propriohypothalamic pathways medial	0	0	0	0	0			0	0	0	0	0
propriohypothalamic pathways ventral	0	0	0	0	0			0	0	0	0	0
periventricular bundle of the hypothalamus	0	0	0	0	0			0	0	0	0	0
dorsal thalamus related	0	0	0	0	0			0	0	0	0	0
periventricular bundle of the thalamus	0	0	0	0	0			0	0	0	0	0
pineal stalk	0	0	0	0	0			0	0	0	0	0
midbrain related	0	0	0	0	0			0	0	0	0	0
dorsal longitudinal fascicle	0	0	0	0	0			0	0	0	0	0
dorsal tegmental tract	0	0	0	0	0			0	0	0	0	0
ventricular systems	0	0	0	0	0			0	0	0	0	0
lateral ventricle	0	0	0	0	0			0	0	0	0	0
rhinocele	0	0	0	0	0			0	0	0	0	0
subependymal zone	0	0	0	0	0			0	0	0	0	0
choroid plexus	0	0	0	0	0			0	0	0	0	0
choroid fissure	0	0	0	0	0			0	0	0	0	0
interventricular foramen	0	0	0	0	0			0	0	0	0	0
third ventricle	0	0	0	0	0			0	0	0	0	0
cerebral aqueduct	0	0	0	0	0			0	0	0	0	0
fourth ventricle	0	0	0	0	0			0	0	0	0	0
lateral recess	0	0	0	0	0			0	0	0	0	0
central canal spinal cord/medulla	0	0	0	0	0			0	0	0	0	0
grooves	0	0	0	0	0			0	0	0	0	0
grooves of the cerebral cortex	0	0	0	0	0			0	0	0	0	0
endorhinal groove	0	0	0	0	0			0	0	0	0	0
hippocampal fissure	0	0	0	0	0			0	0	0	0	0
rhinal fissure	0	0	0	0	0			0	0	0	0	0
rhinal incisure	0	0	0	0	0			0	0	0	0	0
grooves of the cerebellar cortex	0	0	0	0	0			0	0	0	0	0
precentral fissure	0	0	0	0	0			0	0	0	0	0
preculminate fissure	0	0	0	0	0			0	0	0	0	0
primary fissure	0	0	0	0	0			0	0	0	0	0
posterior superior fissure	0	0	0	0	0			0	0	0	0	0
prepyramidal fissure	0	0	0	0	0			0	0	0	0	0
secondary fissure	0	0	0	0	0			0	0	0	0	0
posterolateral fissure	0	0	0	0	0			0	0	0	0	0
nodular fissure	0	0	0	0	0			0	0	0	0	0
simple fissure	0	0	0	0	0			0	0	0	0	0
intercrural fissure	0	0	0	0	0			0	0	0	0	0
ansoparamedian fissure	0	0	0	0	0			0	0	0	0	0
intraparafloccular fissure	0	0	0	0	0			0	0	0	0	0
paramedian sulcus	0	0	0	0	0			0	0	0	0	0
parafloccular sulcus	0	0	0	0	0			0	0	0	0	0
Interpeduncular fossa	0	0	0	0	0			0	0	0	0	0
retina	0	0	0	0	0			0	0	0	0	0
#brainvol	621.66	494.61	519.893	548.45	579.68			489.631	499.695	484.398	465.088	475.328
#maskvol	621.66	494.61	519.893	548.45	579.68			489.631	499.695	484.398	465.088	475.328
